# Supplementary material for: Implementing parallel spreadsheet models for health policy decisions: The impact of unintentional errors on model projections
Source: PLoS One. 2018 Mar 23;13(3):e0194916. doi: 10.1371/journal.pone.0194916 (PMC5865740; doi:10.1371/journal.pone.0194916)
Supplement: S1 File — This file contains the three model versions for the Re-entry into Care model revision, before identification of unintentional implementation errors. (XLSX) [file pone.0194916.s001.xlsx]

## Sheet: Directory
Tab	Description
Directory	A tabled of the different tabs in the model and a description of each
Schematic	A visual schematic of the model framework
User	A user interface
Params	A list of the parameters and their values
TPM	Transition probability matrix model
TPM Output (cell)	TPM Outputs by year, referenced by cell
TPM Summary Measures	TPM summary measured by year
DET Output (name)	DET Outputs by year, referenced by cell name
DET Output (cell)	DET Outputs by year, referenced by cell
DET Output (diff)	DET Difference between output tabs
DET Summary measures	DET summary measured by year
Output (diff)	Difference between Output tabs (TPM - DET)
Summary Measures (diff)	Difference between Summary Measures tabs (TPM - DET)
Log	Describes revisions

## Sheet: Schematic
MODEL CONCEPTUAL FRAMEWORK (DETAILED)

## Sheet: User
	Directions									Locked	Not Locked
	Table on upper left corresponds to policy parameters, table on upper right corresponds to non-policy parameters, table on lower left corresponds to complements.									x
	Parameter names are listed in columns D and M.									x
	Initial and final stages of transition (aymptomatic, intermediate, and AIDS) are listed in columns B and K.									x
	Initial treatment state of transition (no care, in care, ART1, ART2, ART1ear, ATR1late, LTFU) is listed in columns B and K.									x
	Final treatment state of transition (in care, ART1, ART2, LTFU, Dead, ART1ear, ART1late) is listed in columns C and L.									x
	The baseline annual probability is the point estimate and is provided in Columns F and O.									x
	The lower/upper bounds of the baseline annual probability point esrimates are provided in columns G/H and P/Q.									x
	The user enters user-defined annual probabilities in columns I and R. The user-defined probability is constrained by the lower and upper bounds.										x
	If the user enters a user-defined probability, then the final input probability becomes the user-defined probaility. Otherwise, the final input probability becomes the data-defined probability.									x
				Annual Probability
	From	To	Policy Parameter Name	Final Input	Baseline	Lower bound	Upper bound	User-defined
	From Asymptomatic to Asymptomatic
	No Care To	In Care	pAsympt_NoCare_Asympt_InCare_2013plus_u		0.0740274	0	0						Annual Probability
	In Care To	LTFU	pAsympt_InCare_Asympt_LTFU_2013plus_u		0.306795	0	0			From	To	Non-Policy Parameter Name	Final Input	Baseline	Lower bound	Upper bound	User-defined
	Asymptomatic to Intermediate									From Asymptomatic to Asymptomatic
	No Care To	In Care	pAsympt_NoCare_Int_InCare_2013plus_u		0.0740274	0	0			No Care to	Dead	pAsympt_NoCare_Asympt_Dead_2013plus_u		0.018185	0.00921112	0.0314588
		ART1	pAsympt_NoCare_Int_ART1_2013plus_u		0	0	0			In Care to	Dead	pAsympt_InCare_Asympt_Dead_2013plus_u		0.0170631	0.00921112	0.0314588
	In Care To	ART1	pAsympt_InCare_Int_ART1_2013plus_u		0.038	0.034	0.043			LTFU to	Dead	pAsympt_LTFU_Asympt_Dead_2013plus_u		0.018185	0.00921112	0.0314588
	LTFU To	ART1	pAsympt_LTFU_Int_ART1_2013plus_u		0.1313					From Asymptomatic to Intermediate
	From Intermediate to Intermediate									No Care to	No Care	pAsympt_NoCare_Int_NoCare_2013plus_u		0.2	0.124071	0.166432
	No Care To	In Care	pInt_NoCare_Int_InCare_2013plus_u		0.0987032	0	0			In Care to	In Care	pAsympt_InCare_Int_InCare_2013plus_u		0.2	0.124071	0.166432
		ART1	pInt_NoCare_Int_ART1_2013plus_u		0	0	0			LTFU to	LTFU	pAsympt_LTFU_Int_LTFU_2013plus_u		0.2	0.124071	0.166432
	In Care To	ART1	pInt_InCare_Int_ART1_2013plus_u		0.128456	0	0			From Intermediate to Intermediate
		LTFU	pInt_InCare_Int_LTFU_2013plus_u		0.182495	0	0.853426			No Care to	Dead	pInt_NoCare_Int_Dead_2013plus_u		0.0278885	0.00990274	0.0682125
	ART1 To	ART2	pInt_ART1_Int_ART2_2013plus_u		0.00866226	0.00377286	0.0135277			In Care to	Dead	pInt_InCare_Int_Dead_2013plus_u		0.0261679	0.00990274	0.0682125
		LTFU	pInt_ART1_Int_LTFU_2013plus_u		0.0143855	0.00810696	0.0206243			LTFU to	Dead	pInt_LTFU_Int_Dead_2013plus_u		0.0278885	0.00990274	0.0682125
		Dead	pInt_ART1_Int_Dead_2013plus_u		0.00505717	0.00203792	0.0103956			From Intermediate to AIDS
	ART2 To	LTFU	pInt_ART2_Int_LTFU_2013plus_u		0.0143855	0.00810696	0.0206243			No Care to	No Care	pInt_NoCare_AIDS_NoCare_2013plus_u		0.3	0.182562	0.279486
		Dead	pInt_ART2_Int_Dead_2013plus_u		0.00505717	0.00203792	0.0103956			In Care to	In Care	pInt_InCare_AIDS_InCare_2013plus_u		0.3	0.182562	0.279486
	LTFU To	ART1	pInt_LTFU_Int_ART1_2013plus_u		0.1616					LTFU to	LTFU	pInt_LTFU_AIDS_LTFU_2013plus_u		0.240383	0	0
		ART2	pInt_LTFU_Int_ART2_2013plus_u		0.1717					From AIDS to AIDS
	From Intermediate to AIDS									No Care to	Dead	pAIDS_NoCare_AIDS_Dead_2013plus_u		0.410515	0.314557	0.465536
	No Care To	In Care	pInt_NoCare_AIDS_InCare_2013plus_u		0.0987032	0	0			In Care to	Dead	pAIDS_InCare_AIDS_Dead_2013plus_u		0.385187	0.314557	0.465536
		ART1ear	pInt_NoCare_AIDS_ART1ear_2013plus_u		0	0	0			LTFU to	Dead	pAIDS_LTFU_AIDS_Dead_2013plus_u		0.410515	0.314557	0.465536
	In Care To	ART1ear	pInt_InCare_AIDS_ART1ear_2013plus_u		0.089	0.078	0.1
	From AIDS to AIDS
	No Care To	In Care	pAIDS_NoCare_AIDS_InCare_2013plus_u		0.46884	0	0
		ART1ear	pAIDS_NoCare_AIDS_ART1ear_2013plus_u		0.0515874	0	0
	In Care To	ART1ear	pAIDS_InCare_AIDS_ART1ear_2013plus_u		0.432907	0	Varies
		LTFU	pAIDS_InCare_AIDS_LTFU_2013plus_u		0.0588055	0	0.275
	ART1ear To	LTFU	pAIDS_ART1ear_AIDS_LTFU_2013plus_u		0.0317053	0.0122997	0.0205862
		Dead	pAIDS_ART1ear_AIDS_Dead_2013plus_u		0.147805	0.0498259	0.0648731
	ART1late To	ART2	pAIDS_ART1late_AIDS_ART2_2013plus_u		0.0305939	0.0247457	0.0377972
		LTFU	pAIDS_ART1late_AIDS_LTFU_2013plus_u		0.0107977	0.0122997	0.0205862
		Dead	pAIDS_ART1late_AIDS_Dead_2013plus_u		0.0257552	0.0498259	0.0648731
	ART2 To	LTFU	pAIDS_ART2_AIDS_LTFU_2013plus_u		0.0274461	0.0675829	0.0520808
		Dead	pAIDS_ART2_AIDS_Dead_2013plus_u		0.0942122	0.0675829	0.130575
	LTFU To	ART1	pAIDS_LTFU_AIDS_ART1ear_2013plus_u		0.2121
		ART2	pAIDS_LTFU_AIDS_ART2_2013plus_u		0.2323
				Annual Probability
	From	To	Complementary Parameters	Final Input	Baseline	Lower bound	Upper bound	User-defined
	From Asymptomatic to Asymptomatic
	No Care To	No Care	pAsympt_NoCare_2013plus_u		0.63376
	In Care To	In Care	pAsympt_InCare_2013plus_u		0.438142
	LTFU To	LTFU	pAsympt_LTFU_2013plus_u		0.650515
	From Intermediate to Intermediate
	No Care To	No Care	pInt_NoCare_2013plus_u		0.474705
	In Care To	In Care	pInt_InCare_2013plus_u		0.273881
	ART1 To	ART1	pInt_ART1_2013plus_u		0.971895
	ART2 To	ART2	pInt_ART2_2013plus_u		0.980557
	LTFU To	LTFU	pInt_LTFU_2013plus_u		0.398428
	From AIDS to AIDS
	No Care To	No Care	pAIDS_NoCare_2013plus_u		0.0690575
	In Care To	In Care	pAIDS_InCare_2013plus_u		0.1231
	ART1ear To	ART1ear	pAIDS_ART1ear_2013plus_u		0
	ART1late To	ART1late	pAIDS_ART1late_2013plus_u		0.932853
	ART2 To	ART2	pAIDS_ART2_2013plus_u		0.878342
	LTFU To	LTFU	pAIDS_LTFU_2013plus_u		0.145085
	ART1ear To	ART1late	pAIDS_ART1ear_AIDS_ART1late_2013plus_u		0.82049

## Sheet: Notes
Tab	Description
Notes	Description of the different tabs in the file
Params	A list of model parameters and their values
Model (SN)	Output for Single Name model version
Model (SC)	Output for Single Cell model version
Model (Matrix)	Output for Matrix model version, compact version
Model (Matrix calcs)	Transition probability matrices underlying Matrix model version
Diff (SN-SC)	Difference in model output for Single Name and Single Cell model versions, used to identify unintentional errors
Diff (SN-Matrix)	Difference in model output for Single Name and Matrix model versions, used to identify unintentional errors
Diff (SC-Matrix)	Difference in model output for Single Cell and Matrix model versions, used to identify unintentional errors
Errors	List of original errors, by model version, including location, error type, and number of copied propagations
Note: Data in this file are provided in order to duplicate findings for the current analysis. We emphasize that the current analysis does not incorporate calibrated parameter values that might be incorporated after model revision and formal model performance assesment. Therefore, the models presented should be used only to elucidate the process for identifying unintentional errors and should not …

## Sheet: Params
init_prop_Asympt_NoCare		0.339353
init_prop_Asympt_InCare		0.0784138
init_prop_Asympt_LTFU		0.034704
init_prop_Asympt_Dead		0
init_prop_Int_NoCare		0.227031
init_prop_Int_InCare		0.0581573
init_prop_Int_ART1		0.00453715
init_prop_Int_ART2		0
init_prop_Int_LTFU		0.0129827
init_prop_Int_Dead		0
init_prop_AIDS_NoCare		0.183615
init_prop_AIDS_InCare		0.0362073
init_prop_AIDS_ART1ear		0.0227356
init_prop_AIDS_ART1late		0
init_prop_AIDS_ART2		0
init_prop_AIDS_LTFU		0.00226222
init_prop_AIDS_DEAD		0
Inc_2004		110000	WHO	Adult HIV prevalence	98000		130000
Inc_2005	Number of incident HIV-infected individuals at time t=1, where t is defined as an index from 0 (for the prevalent cohort) to n.	10964.4	External calibration (top 25 sets)
Inc_2006	Number of incident HIV-infected individuals at time t=2, where t is defined as an index from 0 (for the prevalent cohort) to n.	10075.4	External calibration (top 25 sets)
Inc_2007	Number of incident HIV-infected individuals at time t=3, where t is defined as an index from 0 (for the prevalent cohort) to n.	10186	External calibration (top 25 sets)
Inc_2008	Number of incident HIV-infected individuals at time t=4, where t is defined as an index from 0 (for the prevalent cohort) to n.	9220.12	External calibration (top 25 sets)
Inc_2009	Number of incident HIV-infected individuals at time t=5, where t is defined as an index from 0 (for the prevalent cohort) to n.	8588.04	External calibration (top 25 sets)
Inc_2010	Number of incident HIV-infected individuals at time t=6, where t is defined as an index from 0 (for the prevalent cohort) to n.	8588.04	Assumption						In current model, parameter refers to 2010.
Inc_2011	Number of incident HIV-infected individuals at time t=7, where t is defined as an index from 0 (for the prevalent cohort) to n.	8588.04	Assumption						In current model, parameter refers to 2011.
Inc_2012	Number of incident HIV-infected individuals at time t=8, where t is defined as an index from 0 (for the prevalent cohort) to n.	8588.04	Assumption						In current model, parameter refers to 2012.
Inc_2013	Number of incident HIV-infected individuals at time t=9, where t is defined as an index from 0 (for the prevalent cohort) to n.	8588.04	Assumption						In current model, parameter refers to 2013.
Inc_2014	Number of incident HIV-infected individuals at time t=10, where t is defined as an index from 0 (for the prevalent cohort) to n.	8588.04	Assumption						In current model, parameter refers to 2014.
Inc_2015	Number of incident HIV-infected individuals at time t=11, where t is defined as an index from 0 (for the prevalent cohort) to n.	8588.04	Assumption						In current model, parameter refers to 2015.
Inc_2016	Number of incident HIV-infected individuals at time t=12, where t is defined as an index from 0 (for the prevalent cohort) to n.	8588.04	Assumption						In current model, parameter refers to 2016.
Inc_2017	Number of incident HIV-infected individuals at time t=13, where t is defined as an index from 0 (for the prevalent cohort) to n.	8588.04	Assumption						In current model, parameter refers to 2017.
Inc_2018	Number of incident HIV-infected individuals at time t=14, where t is defined as an index from 0 (for the prevalent cohort) to n.	8588.04	Assumption						In current model, parameter refers to 2018.
Inc_2019		8588.04	Assumption						In current model, parameter refers to 2019.
Inc_2020		8588.04	Assumption
Inc_2021		8588.04	Assumption
Inc_2022		8588.04	Assumption
Inc_2023		8588.04	Assumption
m_preARTLTFU_Int	Multiplier for pre-ART LTFU for the fraction of the cohort in the Eligible New stage.	3.10337	Assumption		1	Assumption	5	Assumption
m_preARTLTFU_Asympt	Multiplier for pre-ART LTFU for the fraction of the cohort in the Not Eligible stage.	5.21712	Assumption		1	Assumption	6	Assumption
m_Mort_NoCare&LTFU		1.06575
pAsympt_NoCare_Asympt_InCare_2004_2006	Probability of transitioning from Not Eligible, Not in Care to Not Eligible, In Care/Off ART.	0.0563104	External calibration (top 25 sets)		0	0	0	0
pAsympt_NoCare_Asympt_Dead_2004_2006	Probability of transitioning from Not Eligible, Not in Care to Not Eligible, Dead.	0.018185	Assumption	Empiric data: Seroc/Asympt to Death | No Sympt & No AIDS	0.00921112	Same	0.0314588	Same
pAsympt_NoCare_Int_NoCare_2004_2006	Probability of transitioning from Not Eligible, Not in Care to Eligible_Asympt, Not in Care.	0.2	Assumption	Reflects internally calibrated value	0.124071	Orig empiric LB	0.166432	Orig empiric UB
pAsympt_NoCare_Int_InCare_2004_2006	Probability of transitioning from Not Eligible, Not in Care to Eligible_Asympt, In Care/Off ART.	0.0563104	External calibration (top 25 sets)		0	0	0	0
pAsympt_NoCare_Int_ART1_2004_2006	Probability of transitioning from Not Eligible, Not in Care to Eligible_Asympt, In Care/On ART1.	0	n/a		0	Same	0	Same
pAsympt_NoCare_2004_2006	Probability of remaining in Not Eligible, Not in Care.	0.669194	1		0.866718		0.802109
pAsympt_NoCare_Asympt_InCare_2007_2009		0.0740274	External calibration (top 25 sets)		0	0	0	0
pAsympt_NoCare_Asympt_Dead_2007_2009	Probability of transitioning from Not Eligible, Not in Care to Not Eligible, Dead.	0.018185	Assumption	Empiric data: Seroc/Asympt to Death | No Sympt & No AIDS	0.00921112	Same	0.0314588	Same
pAsympt_NoCare_Int_NoCare_2007_2009	Probability of transitioning from Not Eligible, Not in Care to Eligible_Asympt, Not in Care.	0.2	Assumption	Reflects internally valibrated value	0.124071	Orig empiric LB	0.166432	Orig empiric UB
pAsympt_NoCare_Int_InCare_2007_2009		0.0740274	External Calibration (top 25 sets)		0	0	0	0
pAsympt_NoCare_Int_ART1_2007_2009	Probability of transitioning from Not Eligible, Not in Care to Eligible_Asympt, In Care/On ART1.	0	n/a		0	Same	0	Same
pAsympt_NoCare_2007_2009	Probability of remaining in Not Eligible, Not in Care.	0.63376	1		0.866718		0.802109
pAsympt_NoCare_Asympt_InCare_2010_2012		0.0740274	External Calibration (top 25 sets)		0	0	0	0
pAsympt_NoCare_Asympt_Dead_2010_2012		0.018185	Assumption	Empiric data: Seroc/Asympt to Death | No Sympt & No AIDS	0.00921112	Same	0.0314588	Same
pAsympt_NoCare_Int_NoCare_2010_2012		0.2	Assumption	Reflects internally valibrated value	0.124071	Orig empiric LB	0.166432	Orig empiric UB
pAsympt_NoCare_Int_InCare_2010_2012		0.0740274	Assumption - same as 2009 calibrated value		0	0	0	0
pAsympt_NoCare_Int_ART1_2010_2012		0	n/a		0	Same	0	Same
pAsympt_NoCare_2010_2012		0.63376	1		0.866718		0.802109
pAsympt_NoCare_Asympt_InCare_2013plus		0.0740274	External Calibration (top 25 sets)		0	0	0	0
pAsympt_NoCare_Asympt_Dead_2013plus		0.018185	Assumption	Empiric data: Seroc/Asympt to Death | No Sympt & No AIDS	0.00921112	Same	0.0314588	Same
pAsympt_NoCare_Int_NoCare_2013plus		0.2	Assumption	Reflects internally valibrated value	0.124071	Orig empiric LB	0.166432	Orig empiric UB
pAsympt_NoCare_Int_InCare_2013plus		0.0740274	0		0	0	0	0
pAsympt_NoCare_Int_ART1_2013plus		0	n/a		0	Same	0	Same
pAsympt_NoCare_2013plus		0.63376	1		0.866718		0.802109
pAsympt_InCare_Asympt_LTFU_2004_2012	Probability of transitioning from Not Eligible, In Care/off ART to Not Eligible, Lost to Follow-up.	0.306795	Assumption			Assumption		Assumption
pAsympt_InCare_Asympt_Dead_2004_2012	Probability of transitioning from Not Eligible, In Care/off ART to Not Eligible, Dead.	0.0170631	Nat hx cohort	Empiric data: Seroc/Asympt to Death | No Sympt & No AIDS	0.00921112	Same	0.0314588	Same
pAsympt_InCare_Int_InCare_2004_2012	Probability of transitioning from Not Eligible, In Care/off ART to Eligible_Asympt, In Care/Off ART.	0.2	Nat hx cohort	Reflects internally calibrated value	0.124071	Orig empiric LB	0.166432	Orig empiric UB
pAsympt_InCare_Int_ART1_2004_2012	Probability of transitioning from Not Eligible, In Care/off ART to Eligible_Asympt, In Care/On ART1.	0.038	Trans 2 ART cohort (GHESKIO)	Empiric data: 1st CD4 >350 & ART CD4 >200 & <=350	0.034	Same	0.043	Same
pAsympt_InCare_2004_2012	Probability of remaining in Not Eligible, In Care/off ART.	0.438142			0.832718		0.759109
pAsympt_InCare_Asympt_LTFU_2013plus	Probability of transitioning from Not Eligible, In Care/off ART to Not Eligible, Lost to Follow-up.	0.306795	Assumption			Assumption		Assumption
pAsympt_InCare_Asympt_Dead_2013plus	Probability of transitioning from Not Eligible, In Care/off ART to Not Eligible, Dead.	0.0170631	Nat hx cohort	Empiric data: Seroc/Asympt to Death | No Sympt & No AIDS	0.00921112	Same	0.0314588	Same
pAsympt_InCare_Int_InCare_2013plus	Probability of transitioning from Not Eligible, In Care/off ART to Eligible_Asympt, In Care/Off ART.	0.2	Nat hx cohort	Reflects internally calibrated value	0.124071	Orig empiric LB	0.166432	Orig empiric UB
pAsympt_InCare_Int_ART1_2013plus	Probability of transitioning from Not Eligible, In Care/off ART to Eligible_Asympt, In Care/On ART1.	0.038	0	0	0.034	Same	0.043	0
pAsympt_InCare_2013plus	Probability of remaining in Not Eligible, In Care/off ART.	0.438142			0.832718		0.759109
pAsympt_LTFU_Asympt_Dead_2004_2012	Probability of transitioning from Not Eligible, Lost to Follow-up to Not Eligible, Dead.	0.018185	Assumption	Empiric data: Seroc/Asympt to Death | No Sympt & No AIDS	0.00921112	Same	0.0314588	Same
pAsympt_LTFU_Int_LTFU_2004_2012		0.2	Assumption	Reflects internally calibrated value	0.124071	Orig empiric LB	0.166432	Orig empiric UB
pAsympt_LTFU_Int_ART1_2004_2012		0.1212
pAsympt_LTFU_2004_2012	Probability of remaining in Not Eligible, Lost to Follow-up.	0.660615			0.990789		0.968541
pAsympt_LTFU_Asympt_Dead_2013plus	Probability of transitioning from Not Eligible, Lost to Follow-up to Not Eligible, Dead.	0.018185	Assumption	#REF!	0.00921112	Same	0.0314588	#REF!
pAsympt_LTFU_Int_LTFU_2013plus		0.2	Assumption	0	0.124071	Orig empiric LB	0.166432	Assumption
pAsympt_LTFU_Int_ART1_2013plus		0.1313
pAsympt_LTFU_2013plus	Probability of remaining in Not Eligible, Lost to Follow-up.	0.650515			0.990789		0.968541
pInt_NoCare_Int_InCare_2004_2006	Probability of transitioning from Eligible_Asympt, Not in Care to Eligible_Asympt, In Care/Off ART.	0.0750805	External calibration (top 25 sets)		0	0	0	0
pInt_NoCare_Int_ART1_2004_2006	Probability of transitioning from Eligible_Asympt, Not in Care to Eligible_Asympt, In Care/On ART1.	0	n/a		0	Same	0	Same
pInt_NoCare_Int_Dead_2004_2006	Probability of transitioning from Eligible_Asympt, Not in Care to Eligible_Asympt, Dead.	0.0278885	Assumption	#REF!	0.00990274	Same	0.0682125	#REF!
pInt_NoCare_AIDS_NoCare_2004_2006	Probability of transitioning from Eligible_Asympt, Not in Care to Eligible_Old, Not in Care.	0.3	Assumption	#REF!	0.182562	Orig empiric LB	0.279486	#REF!
pInt_NoCare_AIDS_InCare_2004_2006	Probability of transitioning from Eligible_Asympt, Not in Care to Eligible_Old, In Care/Off ART.	0.0750805	External calibration (top 25 sets)		0	0	0	0
pInt_NoCare_AIDS_ART1ear_2004_2006	Probability of transitioning from Eligible_Asympt, Not in Care to Eligible_Old, In Care/On ART1.	0	n/a		0	Same	0	Same
pInt_NoCare_2004_2006	Probability of remaining in Eligible_Asympt, Not in Care.	0.52195			0.807535		0.652302
pInt_NoCare_Int_InCare_2007_2009		0.0987032	External calibration (top 25 sets)		0	0	0	0
pInt_NoCare_Int_ART1_2007_2009	Probability of transitioning from Eligible_Asympt, Not in Care to Eligible_Asympt, In Care/On ART1.	0	n/a		0	Same	0	Same
pInt_NoCare_Int_Dead_2007_2009	Probability of transitioning from Eligible_Asympt, Not in Care to Eligible_Asympt, Dead.	0.0278885	Assumption	Empiric data: Sympt HIV to Death | No AIDS	0.00990274	Same	0.0682125	#REF!
pInt_NoCare_AIDS_NoCare_2007_2009	Probability of transitioning from Eligible_Asympt, Not in Care to Eligible_Old, Not in Care.	0.3	Assumption	Reflects internally calibrated value	0.182562	Orig empiric LB	0.279486	#REF!
pInt_NoCare_AIDS_InCare_2007_2009		0.0987032	0		0	0	0	0
pInt_NoCare_AIDS_ART1ear_2007_2009	Probability of transitioning from Eligible_Asympt, Not in Care to Eligible_Old, In Care/On ART1.	0	n/a		0	Same	0	Same
pInt_NoCare_2007_2009	Probability of remaining in Eligible_Asympt, Not in Care.	0.474705			0.807535		0.652302
pInt_NoCare_Int_InCare_2010_2012		0.0987032	External calibration (top 25 sets)		0	0	0	0
pInt_NoCare_Int_ART1_2010_2012	Probability of transitioning from Eligible_Asympt, Not in Care to Eligible_Asympt, In Care/On ART1.	0	n/a		0	Same	0	Same
pInt_NoCare_Int_Dead_2010_2012	Probability of transitioning from Eligible_Asympt, Not in Care to Eligible_Asympt, Dead.	0.0278885	Assumption	Empiric data: Sympt HIV to Death | No AIDS	0.00990274	Same	0.0682125	0
pInt_NoCare_AIDS_NoCare_2010_2012	Probability of transitioning from Eligible_Asympt, Not in Care to Eligible_Old, Not in Care.	0.3	Assumption	Reflects internally calibrated value	0.182562	Orig empiric LB	0.279486	#REF!
pInt_NoCare_AIDS_InCare_2010_2012		0.0987032	Trans 2 ART cohort (GHESKIO)		0	0	0	Same
pInt_NoCare_AIDS_ART1ear_2010_2012	Probability of transitioning from Eligible_Asympt, Not in Care to Eligible_Old, In Care/On ART1.	0	n/a		0	Same	0	Same
pInt_NoCare_2010_2012	Probability of remaining in Eligible_Asympt, Not in Care.	0.474705			0.807535		0.652302
pInt_NoCare_Int_InCare_2013plus		0.0987032	External calibration (top 25 sets)		0	0	0	0
pInt_NoCare_Int_ART1_2013plus	Probability of transitioning from Eligible_Asympt, Not in Care to Eligible_Asympt, In Care/On ART1.	0	n/a		0	Same	0	Same
pInt_NoCare_Int_Dead_2013plus	Probability of transitioning from Eligible_Asympt, Not in Care to Eligible_Asympt, Dead.	0.0278885	Assumption	Empiric data: Sympt HIV to Death | No AIDS	0.00990274	Same	0.0682125	0
pInt_NoCare_AIDS_NoCare_2013plus	Probability of transitioning from Eligible_Asympt, Not in Care to Eligible_Old, Not in Care.	0.3	Assumption	Reflects internally calibrated value	0.182562	Orig empiric LB	0.279486	n/a
pInt_NoCare_AIDS_InCare_2013plus		0.0987032	0		0	0	0	0
pInt_NoCare_AIDS_ART1ear_2013plus	Probability of transitioning from Eligible_Asympt, Not in Care to Eligible_Old, In Care/On ART1.	0	n/a		0	Same	0	Same
pInt_NoCare_2013plus	Probability of remaining in Eligible_Asympt, Not in Care.	0.474705			0.807535		0.652302
pInt_InCare_Int_ART1_2004_2012	Probability of transitioning from Eligible_Asympt, In Care/off ART to Eligible_Asympt, In Care/On ART1.	0.128456	Assumption - same as 2009 calibrated value	0	0	0	0	0
pInt_InCare_Int_LTFU_2004_2012	Probability of transitioning from Eligible_Asympt, In Care/off ART to Eligible_Asympt, Lost to Follow-up.	0.182495	External calibration (top 25 sets)		0		0.853426
pInt_InCare_Int_Dead_2004_2012	Probability of transitioning from Eligible_Asympt, In Care/off ART to Eligible_Asympt, Dead.	0.0261679	Nat hx cohort	Empiric data: Sympt HIV to Death | No AIDS	0.00990274	Same	0.0682125	Same
pInt_InCare_AIDS_InCare_2004_2012	Probability of transitioning from Eligible_Asympt, In Care/off ART to Eligible_Old, In Care/Off ART.	0.3	Nat hx cohort	Reflects internally calibrated value	0.182562	Orig empiric LB	0.279486	Orig empiric UB
pInt_InCare_AIDS_ART1ear_2004_2012	Probability of transitioning from Eligible_Asympt, In Care/off ART to Eligible_Asympt, In Care/On ART1.	0.089	0	0	0.078	Same	0.1	0
pInt_InCare_2004_2012	Probability of remaining in Eligible_Asympt, In Care/off ART.	0.273881			Varies		Varies
pInt_InCare_Int_ART1_2013plus		0.128456	0	0	0	0	0	0
pInt_InCare_Int_LTFU_2013plus	Probability of transitioning from Eligible_Asympt, In Care/off ART to Eligible_Asympt, Lost to Follow-up.	0.182495	External calibration (top 25 sets)		0		0.853426
pInt_InCare_Int_Dead_2013plus	Probability of transitioning from Eligible_Asympt, In Care/off ART to Eligible_Asympt, Dead.	0.0261679	Nat hx cohort	Empiric data: Sympt HIV to Death | No AIDS	0.00990274	Same	0.0682125	Same
pInt_InCare_AIDS_InCare_2013plus	Probability of transitioning from Eligible_Asympt, In Care/off ART to Eligible_Old, In Care/Off ART.	0.3	Nat hx cohort	Reflects internally calibrated value	0.182562	Orig empiric LB	0.279486	Orig empiric UB
pInt_InCare_AIDS_ART1ear_2013plus	Probability of transitioning from Eligible_Asympt, In Care/off ART to Eligible_Asympt, In Care/On ART1.	0.089	Trans 2 ART cohort (GHESKIO)	Empiric data: 1st CD4>200 & <=350 & ART<=200	0.078	Same	0.1	0
pInt_InCare_2013plus	Probability of remaining in Eligible_Asympt, In Care/off ART.	0.273881			Varies		Varies
pInt_ART1_Int_ART2_2004_2012	Probability of transitioning from Eligible_Asympt, In Care/on ART1 to Eligible_Asympt, In Care/on ART2.	0.00866226	CIPRA cohort	Event 14 in data analysis results dated 2/23/2011	0.00377286	Same	0.0135277	Same
pInt_ART1_Int_LTFU_2004_2012	Probability of transitioning from Eligible_Asympt, In Care/on ART1 to Eligible_Asympt, Lost to Follow-up.	0.0143855	Assumption	Empiric data: ART1 to LTFU	0.00810696	Same	0.0206243	Same
pInt_ART1_Int_Dead_2004_2012	Probability of transitioning from Eligible_Asympt, In Care/on ART1 to Eligible_Asympt, Dead.	0.00505717	Assumption	Empiric data: ART1 to any death	0.00203792	Same	0.0103956	Same
pInt_ART1_2004_2012	Probability of remaining in Eligible_Asympt, In Care/on ART1.	0.971895			0.986082		0.955452
pInt_ART1_Int_ART2_2013plus	Probability of transitioning from Eligible_Asympt, In Care/on ART1 to Eligible_Asympt, In Care/on ART2.	0.00866226	CIPRA cohort	Event 14 in data analysis results dated 2/23/2011	0.00377286	Same	0.0135277	Same
pInt_ART1_Int_LTFU_2013plus	Probability of transitioning from Eligible_Asympt, In Care/on ART1 to Eligible_Asympt, Lost to Follow-up.	0.0143855	Assumption	Empiric data (complete dataset): ART2 to death	0.00810696	Same	0.0206243	Same
pInt_ART1_Int_Dead_2013plus	Probability of transitioning from Eligible_Asympt, In Care/on ART1 to Eligible_Asympt, Dead.	0.00505717	Assumption	0	0.00203792	Same	0.0103956	Same
pInt_ART1_2013plus	Probability of remaining in Eligible_Asympt, In Care/on ART1.	0.971895			0.986082		0.955452
pInt_ART2_Int_LTFU_2004_2012	Probability of transitioning from Eligible_Asympt, In Care/on ART2 to Eligible_Asympt, Lost to Follow-up.	0.0143855	Assumption	Empiric data: ART1 to LTFU	0.00810696	Same	0.0206243	Same
pInt_ART2_Int_Dead_2004_2012	Probability of transitioning from Eligible_Asympt, In Care/on ART2 to Eligible_Asympt, Dead.	0.00505717	Assumption	Empiric data: ART1 to any death	0.00203792	Same	0.0103956	Same
pInt_ART2_2004_2012	Probability of remaining in Eligible_Asympt, In Care/on ART2.	0.980557			0.989855		0.96898
pInt_ART2_Int_LTFU_2013plus	Probability of transitioning from Eligible_Asympt, In Care/on ART2 to Eligible_Asympt, Lost to Follow-up.	0.0143855	Assumption	Event 14 in data analysis results dated 2/23/2011	0.00810696	Same	0.0206243	Same
pInt_ART2_Int_Dead_2013plus	Probability of transitioning from Eligible_Asympt, In Care/on ART2 to Eligible_Asympt, Dead.	0.00505717	Assumption	Empiric data (complete dataset): ART2 to death	0.00203792	Same	0.0103956	Same
pInt_ART2_2013plus	Probability of remaining in Eligible_Asympt, In Care/on ART2.	0.980557			0.989855		0.96898
pInt_LTFU_Int_Dead_2004_2012	Probability of transitioning from Eligible_Asympt, Lost to Follow-up to Eligible_Asympt, Dead.	0.0278885	Assumption	#REF!	0.00990274	Same	0.0682125	#REF!
pInt_LTFU_Int_ART1_2004_2012		0.1414
pInt_LTFU_Int_ART2_2004_2012		0.1515
pInt_LTFU_AIDS_LTFU_2004_2012		0.240383	External calibration (top 25 sets)
pInt_LTFU_2004_2012	Probability of remaining in Eligible_Asympt, Lost to Follow-up.	0.438828			0.990097		0.931787
pInt_LTFU_Int_Dead_2013plus	Probability of transitioning from Eligible_Asympt, Lost to Follow-up to Eligible_Asympt, Dead.	0.0278885	Assumption	#REF!	0.00990274	Same	0.0682125	#REF!
pInt_LTFU_Int_ART1_2013plus		0.1616
pInt_LTFU_Int_ART2_2013plus		0.1717
pInt_LTFU_AIDS_LTFU_2013plus		0.240383	0
pInt_LTFU_2013plus	Probability of remaining in Eligible_Asympt, Lost to Follow-up.	0.398428			0.990097		0.931787
pAIDS_NoCare_AIDS_InCare_2004_2006	Probability of transitioning from Eligible_Old, Not in Care to Eligible_Old, In Care/Off ART.	0.0938507	External calibration (top 25 sets)		0	0	0	0
pAIDS_NoCare_AIDS_ART1ear_2004_2006	Probability of transitioning from Eligible_Old, Not in Care to Eligible_Old, In Care/On ART1.	0.0515874	n/a		0	n/a	0	n/a
pAIDS_NoCare_AIDS_Dead_2004_2006	Probability of transitioning from Eligible_Old, Not in Care to Eligible_Old, Dead.	0.410515	Assumption	Empiric data: AIDS to death	0.314557	Same	0.465536	Same
pAIDS_NoCare_2004_2006	Probability of remaining in Eligible_Old, Not in Care.	0.444047			0.685443		0.534464
pAIDS_NoCare_AIDS_InCare_2007_2009		0.46884	External calibration (top 25 sets)		0	0	0	0
pAIDS_NoCare_AIDS_ART1ear_2007_2009	Probability of transitioning from Eligible_Old, Not in Care to Eligible_Old, In Care/On ART1.	0.0515874	n/a		0	n/a	0	n/a
pAIDS_NoCare_AIDS_Dead_2007_2009	Probability of transitioning from Eligible_Old, Not in Care to Eligible_Old, Dead.	0.410515	Assumption	Empiric data: ART1 to any death	0.314557	Same	0.465536	Same
pAIDS_NoCare_2007_2009	Probability of remaining in Eligible_Old, Not in Care.	0.0690575			0.685443		0.534464
pAIDS_NoCare_AIDS_InCare_2010_2012		0.46884	0		0	0	0	0
pAIDS_NoCare_AIDS_ART1ear_2010_2012	Probability of transitioning from Eligible_Old, Not in Care to Eligible_Old, In Care/On ART1.	0.0515874	n/a		0	n/a	0	n/a
pAIDS_NoCare_AIDS_Dead_2010_2012	Probability of transitioning from Eligible_Old, Not in Care to Eligible_Old, Dead.	0.410515	Assumption	Empiric data: ART1 to any death	0.314557	Same	0.465536	Same
pAIDS_NoCare_2010_2012	Probability of remaining in Eligible_Old, Not in Care.	0.0690575			0.685443		0.534464
pAIDS_NoCare_AIDS_InCare_2013plus		0.46884	External calibration (top 25 sets)		0	0	0	0
pAIDS_NoCare_AIDS_ART1ear_2013plus	Probability of transitioning from Eligible_Old, Not in Care to Eligible_Old, In Care/On ART1.	0.0515874	n/a		0	n/a	0	n/a
pAIDS_NoCare_AIDS_Dead_2013plus	Probability of transitioning from Eligible_Old, Not in Care to Eligible_Old, Dead.	0.410515	Assumption	0	0.314557	Same	0.465536	0
pAIDS_NoCare_2013plus	Probability of remaining in Eligible_Old, Not in Care.	0.0690575			0.685443		0.534464
pAIDS_InCare_AIDS_ART1ear_2005	Probability of transitioning from Eligible_Old, In Care/off ART to Eligible_Old, In Care/On ART1.	0.35989	External calibration (top 25 sets)		0		Varies
pAIDS_InCare_AIDS_LTFU_2004_2012	Probability of transitioning from Eligible_Old, In Care/off ART to Eligible_Old, Lost to Follow-up.	0.0588055	Calibration		0	Assumption	0.275	UB of ENEW multiplier
pAIDS_InCare_AIDS_Dead_2004_2012	Probability of transitioning from Eligible_Old, In Care/off ART to Eligible_OId, Dead.	0.385187	Nat hx cohort	Empiric data: AIDS to death	0.314557	Same	0.465536	Same
pAIDS_InCare_2005	Probability of remaining in Eligible_OId, In Care/off ART.	0.196117			0.685443		0.259464
pAIDS_InCare_AIDS_ART1ear_2006		0.130418	External calibration (top 25 sets)		0		Varies
pAIDS_InCare_AIDS_LTFU_2004_2012	Probability of transitioning from Eligible_Old, In Care/off ART to Eligible_Old, Lost to Follow-up.	0.0588055	Calibration		0	Assumption	0.275	UB of ENEW multiplier
pAIDS_InCare_AIDS_Dead_2004_2012	Probability of transitioning from Eligible_Old, In Care/off ART to Eligible_OId, Dead.	0.385187	Nat hx cohort	Empiric data: AIDS to death	0.314557	Same	0.465536	Same
pAIDS_InCare_2006	Probability of remaining in Eligible_OId, In Care/off ART.	0.425589			0.685443		0.259464
pAIDS_InCare_AIDS_ART1ear_2007		0.38379	External calibration (top 25 sets)		0		Varies
pAIDS_InCare_AIDS_LTFU_2004_2012	Probability of transitioning from Eligible_Old, In Care/off ART to Eligible_Old, Lost to Follow-up.	0.0588055	Calibration		0	Assumption	0.275	UB of ENEW multiplier
pAIDS_InCare_AIDS_Dead_2004_2012	Probability of transitioning from Eligible_Old, In Care/off ART to Eligible_OId, Dead.	0.385187	Nat hx cohort	Empiric data: AIDS to death	0.314557	Same	0.465536	Same
pAIDS_InCare_2007	Probability of remaining in Eligible_OId, In Care/off ART.	0.172217			0.685443		0.259464
pAIDS_InCare_AIDS_ART1ear_2008		0.420461	External calibration (top 25 sets)		0		Varies
pAIDS_InCare_AIDS_LTFU_2004_2012	Probability of transitioning from Eligible_Old, In Care/off ART to Eligible_Old, Lost to Follow-up.	0.0588055	Calibration		0	Assumption	0.275	UB of ENEW multiplier
pAIDS_InCare_AIDS_Dead_2004_2012	Probability of transitioning from Eligible_Old, In Care/off ART to Eligible_OId, Dead.	0.385187	Nat hx cohort	Empiric data: AIDS to death	0.314557	Same	0.465536	Same
pAIDS_InCare_2008	Probability of remaining in Eligible_OId, In Care/off ART.	0.135546			0.685443		0.259464
pAIDS_InCare_AIDS_ART1ear_2009		0.432907	External calibration (top 25 sets)		0		Varies
pAIDS_InCare_AIDS_LTFU_2004_2012	Probability of transitioning from Eligible_Old, In Care/off ART to Eligible_Old, Lost to Follow-up.	0.0588055	Calibration		0	Assumption	0.275	UB of ENEW multiplier
pAIDS_InCare_AIDS_Dead_2004_2012	Probability of transitioning from Eligible_Old, In Care/off ART to Eligible_OId, Dead.	0.385187	Nat hx cohort	Empiric data: AIDS to death	0.314557	Same	0.465536	Same
pAIDS_InCare_2009	Probability of remaining in Eligible_OId, In Care/off ART.	0.1231			0.685443		0.259464
pAIDS_InCare_AIDS_ART1ear_2010		0.432907	External calibration (top 25 sets)		0		Varies
pAIDS_InCare_AIDS_LTFU_2004_2012	Probability of transitioning from Eligible_Old, In Care/off ART to Eligible_Old, Lost to Follow-up.	0.0588055	Calibration		0	Assumption	0.275	UB of ENEW multiplier
pAIDS_InCare_AIDS_Dead_2004_2012	Probability of transitioning from Eligible_Old, In Care/off ART to Eligible_OId, Dead.	0.385187	Nat hx cohort	Empiric data: AIDS to death	0.314557	Same	0.465536	Same
pAIDS_InCare_2010	Probability of remaining in Eligible_OId, In Care/off ART.	0.1231			0.685443		0.259464
pAIDS_InCare_AIDS_ART1ear_2011		0.432907	External calibration (top 25 sets)		0		Varies
pAIDS_InCare_AIDS_LTFU_2004_2012	Probability of transitioning from Eligible_Old, In Care/off ART to Eligible_Old, Lost to Follow-up.	0.0588055	Calibration		0	Assumption	0.275	UB of ENEW multiplier
pAIDS_InCare_AIDS_Dead_2004_2012	Probability of transitioning from Eligible_Old, In Care/off ART to Eligible_OId, Dead.	0.385187	Nat hx cohort	Empiric data: AIDS to death	0.314557	Same	0.465536	Same
pAIDS_InCare_2011	Probability of remaining in Eligible_OId, In Care/off ART.	0.1231			0.685443		0.259464
pAIDS_InCare_AIDS_ART1ear_2012		0.432907	External calibration (top 25 sets)		0		Varies
pAIDS_InCare_AIDS_LTFU_2004_2012	Probability of transitioning from Eligible_Old, In Care/off ART to Eligible_Old, Lost to Follow-up.	0.0588055	Calibration		0	Assumption	0.275	UB of ENEW multiplier
pAIDS_InCare_AIDS_Dead_2004_2012	Probability of transitioning from Eligible_Old, In Care/off ART to Eligible_OId, Dead.	0.385187	Nat hx cohort	Empiric data: AIDS to death	0.314557	Same	0.465536	Same
pAIDS_InCare_2012	Probability of remaining in Eligible_OId, In Care/off ART.	0.1231			0.685443		0.259464
pAIDS_InCare_AIDS_ART1ear_2013plus		0.432907	External calibration (top 25 sets)		0		Varies
pAIDS_InCare_AIDS_LTFU_2013plus	Probability of transitioning from Eligible_Old, In Care/off ART to Eligible_Old, Lost to Follow-up.	0.0588055	Calibration		0	Assumption	0.275	UB of ENEW multiplier
pAIDS_InCare_AIDS_Dead_2013plus	Probability of transitioning from Eligible_Old, In Care/off ART to Eligible_OId, Dead.	0.385187	Nat hx cohort	Empiric data: AIDS to death	0.314557	Same	0.465536	Same
pAIDS_InCare_2013plus	Probability of remaining in Eligible_OId, In Care/off ART.	0.1231			0.685443		0.259464
pAIDS_ART1ear_AIDS_ART1late_2004_2012	Probability of transitioning from Eligible_Old, In Care/on ART1 to Eligible_Old, In Care/on ART2.	0.82049	ART longitudinal cohort	Empiric data: ART1 early to ART1 late		Same		Same
pAIDS_ART1ear_AIDS_LTFU_2004_2012	Probability of transitioning from Eligible_Old, In Care/on ART1 to Eligible_Old, Lost to Follow-up.	0.0317053	ART longitudinal cohort	Empiric data: ART1 to LTFU	0.0122997	Same	0.0205862	Same
pAIDS_ART1ear_AIDS_Dead_2004_2012	Probability of transitioning from Eligible_Old, In Care/on ART1 to Eligible_OId, Dead.	0.147805	ART longitudinal cohort	Empiric data: ART1 to any death	0.0498259	Same	0.0648731	Same
pAIDS_ART1ear_2004_2012	Probability of remaining in Eligible_Old, In Care/on ART1.	0			0.937874		0.914541
pAIDS_ART1ear_AIDS_ART1late_2013plus	Probability of transitioning from Eligible_Old, In Care/on ART1 to Eligible_Old, In Care/on ART2.	0.82049	ART longitudinal cohort	Empiric data: ART1 early to ART1 late		Same		Same
pAIDS_ART1ear_AIDS_LTFU_2013plus	Probability of transitioning from Eligible_Old, In Care/on ART1 to Eligible_Old, Lost to Follow-up.	0.0317053	ART longitudinal cohort	Empiric data: ART1 to LTFU	0.0122997	Same	0.0205862	Same
pAIDS_ART1ear_AIDS_Dead_2013plus	Probability of transitioning from Eligible_Old, In Care/on ART1 to Eligible_OId, Dead.	0.147805	ART longitudinal cohort	Empiric data: ART1 to any death	0.0498259	Same	0.0648731	Same
pAIDS_ART1ear_2013plus	Probability of remaining in Eligible_Old, In Care/on ART1.	0			0.937874		0.914541
pAIDS_ART1late_AIDS_ART2_2004_2012		0.0305939	1st-line ART longitudinal cohort with info from ART longitudinal cohort	Empiric data (complete dataset): Late ART1 to ART2	0.0247457	Same	0.0377972	Same
pAIDS_ART1late_AIDS_LTFU_2004_2012		0.0107977	ART longitudinal cohort	Empiric data: ART1 to LTFU	0.0122997	Same	0.0205862	Same
pAIDS_ART1late_AIDS_Dead_2004_2012		0.0257552	ART longitudinal cohort	Empiric data: ART1 to any death	0.0498259	Same	0.0648731	Same
pAIDS_ART1late_2004_2012		0.932853			0.913129		0.876744
pAIDS_ART1late_AIDS_ART2_2013plus		0.0305939	1st-line ART longitudinal cohort with info from ART longitudinal cohort	Empiric data (complete dataset): Late ART1 to ART2	0.0247457	Same	0.0377972	Same
pAIDS_ART1late_AIDS_LTFU_2013plus		0.0107977	ART longitudinal cohort	Empiric data: ART1 to LTFU	0.0122997	Same	0.0205862	Same
pAIDS_ART1late_AIDS_Dead_2013plus		0.0257552	ART longitudinal cohort	Empiric data: ART1 to any death	0.0498259	Same	0.0648731	Same
pAIDS_ART1late_2013plus		0.932853			0.913129		0.876744
pAIDS_ART2_AIDS_LTFU_2004_2012	Probability of transitioning from Eligible_Old, In Care/on ART2 to Eligible_Old, Lost to Follow-up.	0.0274461	1st-line ART failures cohort	Empiric data (complete dataset): ART2 to LTFU	0.0143757	Same	0.0520808	Same
pAIDS_ART2_AIDS_Dead_2004_2012	Probability of transitioning from Eligible_Old, In Care/on ART2 to Eligible_OId, Dead.	0.0942122	1st-line ART failures cohort	Empiric data (complete dataset): ART2 to death	0.0675829	Same	0.130575	Same
pAIDS_ART2_2004_2012	Probability of remaining in Eligible_Old, In Care/on ART2.	0.878342			0.918041		0.817344
pAIDS_ART2_AIDS_LTFU_2013plus	Probability of transitioning from Eligible_Old, In Care/on ART2 to Eligible_Old, Lost to Follow-up.	0.0274461	1st-line ART failures cohort	Empiric data (complete dataset): ART2 to LTFU	0.0143757	Same	0.0520808	Same
pAIDS_ART2_AIDS_Dead_2013plus	Probability of transitioning from Eligible_Old, In Care/on ART2 to Eligible_OId, Dead.	0.0942122	1st-line ART failures cohort	Empiric data (complete dataset): ART2 to death	0.0675829	Same	0.130575	Same
pAIDS_ART2_2013plus	Probability of remaining in Eligible_Old, In Care/on ART2.	0.878342			0.918041		0.817344
pAIDS_LTFU_AIDS_Dead_2004_2012	Probability of transitioning from Eligible_Old, Lost to Follow-up to Eligible_Old, Dead.	0.410515	Assumption	Empiric data: AIDS to death	0.314557	Same	0.465536	Same
pAIDS_LTFU_AIDS_ART1ear_2004_2012		0.1818
pAIDS_LTFU_AIDS_ART2_2004_2012		0.1919
pAIDS_LTFU_2004_2012	Probability of remaining in Eligible_OId, Lost to Follow-up.	0.215785			0.685443		0.534464
pAIDS_LTFU_AIDS_Dead_2013plus	Probability of transitioning from Eligible_Old, Lost to Follow-up to Eligible_Old, Dead.	0.410515	Assumption	0	0.314557	Same	0.465536	0
pAIDS_LTFU_AIDS_ART1ear_2013plus		0.2121
pAIDS_LTFU_AIDS_ART2_2013plus		0.2323
pAIDS_LTFU_2013plus	Probability of remaining in Eligible_OId, Lost to Follow-up.	0.145085			0.685443		0.534464
pAsympt_NoCare_Asympt_InCare_2013plus_u		0.0740274
pAsympt_InCare_Asympt_LTFU_2013plus_u		0.306795
pAsympt_NoCare_Int_InCare_2013plus_u		0.0740274
pAsympt_NoCare_Int_ART1_2013plus_u		0
pAsympt_InCare_Int_ART1_2013plus_u		0.038
pAsympt_LTFU_Int_ART1_2013plus_u		0.1313
pInt_NoCare_Int_InCare_2013plus_u		0.0987032
pInt_NoCare_Int_ART1_2013plus_u		0
pInt_InCare_Int_ART1_2013plus_u		0.128456
pInt_InCare_Int_LTFU_2013plus_u		0.182495
pInt_ART1_Int_ART2_2013plus_u		0.00866226
pInt_ART1_Int_LTFU_2013plus_u		0.0143855
pInt_ART1_Int_Dead_2013plus_u		0.00505717
pInt_ART2_Int_LTFU_2013plus_u		0.0143855
pInt_ART2_Int_Dead_2013plus_u		0.00505717
pInt_LTFU_Int_ART1_2013plus_u		0.1616
pInt_LTFU_Int_ART2_2013plus_u		0.1717
pInt_NoCare_AIDS_InCare_2013plus_u		0.0987032
pInt_NoCare_AIDS_ART1ear_2013plus_u		0
pInt_InCare_AIDS_ART1ear_2013plus_u		0.089
pAIDS_NoCare_AIDS_InCare_2013plus_u		0.46884
pAIDS_NoCare_AIDS_ART1ear_2013plus_u		0.0515874
pAIDS_InCare_AIDS_ART1ear_2013plus_u		0.432907
pAIDS_InCare_AIDS_LTFU_2013plus_u		0.0588055
pAIDS_ART1ear_AIDS_LTFU_2013plus_u		0.0317053
pAIDS_ART1ear_AIDS_Dead_2013plus_u		0.147805
pAIDS_ART1late_AIDS_ART2_2013plus_u		0.0305939
pAIDS_ART1late_AIDS_LTFU_2013plus_u		0.0107977
pAIDS_ART1late_AIDS_Dead_2013plus_u		0.0257552
pAIDS_ART2_AIDS_LTFU_2013plus_u		0.0274461
pAIDS_ART2_AIDS_Dead_2013plus_u		0.0942122
pAIDS_LTFU_AIDS_ART1ear_2013plus_u		0.2121
pAIDS_LTFU_AIDS_ART2_2013plus_u		0.2323
pAsympt_NoCare_2013plus_u		0.63376
pAsympt_InCare_2013plus_u		0.438142
pAsympt_LTFU_2013plus_u		0.650515
pInt_NoCare_2013plus_u		0.474705
pInt_InCare_2013plus_u		0.273881
pInt_ART1_2013plus_u		0.971895
pInt_ART2_2013plus_u		0.980557
pInt_LTFU_2013plus_u		0.398428
pAIDS_NoCare_2013plus_u		0.0690575
pAIDS_InCare_2013plus_u		0.1231
pAIDS_ART1ear_2013plus_u		0
pAIDS_ART1late_2013plus_u		0.932853
pAIDS_ART2_2013plus_u		0.878342
pAIDS_LTFU_2013plus_u		0.145085
pAIDS_ART1ear_AIDS_ART1late_2013plus_u		0.82049
pAsympt_NoCare_Asympt_Dead_2013plus_u		0.018185
pAsympt_InCare_Asympt_Dead_2013plus_u		0.0170631
pAsympt_LTFU_Asympt_Dead_2013plus_u		0.018185
pAsympt_NoCare_Int_NoCare_2013plus_u		0.2
pAsympt_InCare_Int_InCare_2013plus_u		0.2
pAsympt_LTFU_Int_LTFU_2013plus_u		0.2
pInt_NoCare_Int_Dead_2013plus_u		0.0278885
pInt_InCare_Int_Dead_2013plus_u		0.0261679
pInt_LTFU_Int_Dead_2013plus_u		0.0278885
pInt_NoCare_AIDS_NoCare_2013plus_u		0.3
pInt_InCare_AIDS_InCare_2013plus_u		0.3
pInt_LTFU_AIDS_LTFU_2013plus_u		0.240383
pAIDS_NoCare_AIDS_Dead_2013plus_u		0.410515
pAIDS_InCare_AIDS_Dead_2013plus_u		0.385187
pAIDS_LTFU_AIDS_Dead_2013plus_u		0.410515

## Sheet: Error Report
	CASE STUDY 1
			TPM	SCF (name)	SCF (cell)
	time (min)	find and replace	1	1
		type parameter names in user tab	5	5
		add parameter names to Name Manager	2	2
		replace cell references to 2013+ data-defined probs with user probs			47
		total	8	8	47
	errors		0	0	0
	CASE STUDY 2	Step 1: Re-entry into care
	User tab	13 min
	Param tab	11 min
	TPM tab	15 min
	SCF Output (name)	16 min
	SCF Output (cell)	24 min

## Sheet: Model (SN)
		2004	2005	2006	2007	2008	2009	2010	2011	2012	2013	2014	2015	2016	2017	2018	2019	2020	2021	2022	2023
Asymptomatic
	Not in care	37328.9	35944.6	34129.4	31815.8	29383.7	27210.3	25832.8	24959.9	24406.6	24056	23833.8	23692.9	23603.7	23547.1	23511.3	23488.5	23474.1	23465	23459.2	23455.6
	In care, off ART	8625.51	5881.2	4600.85	4542.33	4345.43	4079.12	3801.54	3577.95	3415.36	3303.17	3228.06	3178.7	3146.65	3126	3112.76	3104.31	3098.92	3095.5	3093.32	3091.94
	Lost from care	3817.44	5168.12	5218.46	4858.92	4603.44	4374.26	4141.15	3902	3675.42	3438.73	3250.34	3104.75	2994.9	2913.6	2854.38	2811.8	2781.5	2760.14	2745.2	2734.81
	Deaths
	Not in care		678.827	653.654	620.644	578.572	534.344	494.82	469.771	453.896	443.835	437.459	433.418	430.857	429.234	428.205	427.553	427.14	426.878	426.712	426.607
	In care, off ART		147.178	100.351	78.5048	77.5063	74.1465	69.6023	64.866	61.0509	58.2766	56.3623	55.0807	54.2384	53.6915	53.3392	53.1133	52.9691	52.8772	52.8188	52.7816
	Lost from care		69.4203	93.9826	94.898	88.3596	83.7138	79.5461	75.3071	70.9581	66.8377	62.5335	59.1076	56.46	54.4623	52.984	51.9071	51.1327	50.5818	50.1934	49.9216
	Subtotal - This period		895.425	847.988	794.047	744.438	692.205	643.968	609.944	585.905	568.949	556.355	547.606	541.555	537.388	534.528	532.574	531.242	530.337	529.724	529.31
Intermediate
	Not in care	24973.4	20500.7	17889.3	15318	13634.7	12349.2	11304.3	10532.8	9991.93	9624.54	9380.01	9219.49	9115.12	9047.73	9004.42	8976.69	8958.99	8947.7	8940.52	8935.96
	In care, off ART	6397.3	7454.22	6781.06	7069.61	6711.88	6228.33	5754.86	5364.56	5072.17	4865.24	4723.9	4629.59	4567.61	4527.32	4501.32	4484.62	4473.94	4467.12	4462.78	4460.02
	In care, on ART1	499.086	2299.21	4404.66	6462.03	8503.49	10428	12198.3	13805.5	15259.9	16693.2	17978.5	19154.9	20248.5	21277.8	22256.1	23193	24095.5	24968.8	25816.4	26641
	In care, on ART2		220.68	624.877	1189.58	1815.39	2473.32	3134.99	3784.38	4413.74	5095.78	5728.31	6330.9	6914.35	7485.34	8048.36	8606.49	9161.89	9716.02	10269.8	10824
	Lost from care
	In Care, Off ART	1428.1	1794.16	2147.69	2179.98	2246.8	2210.85	2106.82	1974.76	1845.59	1660.98	1549.66	1479.52	1434.36	1405.06	1386.03	1373.7	1365.74	1360.62	1357.34	1355.24
	In Care, Off ART (from Asympt)		763.488	1368.67	1644.3	1693.35	1663.78	1604.96	1532.53	1452.92	1313.97	1211.27	1132.67	1072.24	1026.19	991.583	965.951	947.222	933.701	924.042	917.204
	In Care, on ART1		7.17961	36.226	79.2604	127.741	178.384	228.292	275.66	319.566	346.846	378.334	409.37	438.658	466.059	491.784	516.106	539.275	561.49	582.902	603.627
	In Care, on ART2		0	3.17459	10.3823	21.6688	35.6241	51.2129	67.5721	84.0929	96.999	111.953	127.01	141.678	155.915	169.801	183.434	196.894	210.247	223.538	236.801
	Subtotal - pre-ART	1428.1	2557.65	3516.35	3824.28	3940.15	3874.62	3711.79	3507.3	3298.51	2974.95	2760.93	2612.19	2506.6	2431.25	2377.61	2339.65	2312.96	2294.32	2281.38	2272.44
	Subtotal - on ART	0	7.17961	39.4005	89.6426	149.41	214.008	279.505	343.232	403.659	443.845	490.287	536.38	580.335	621.974	661.585	699.54	736.169	771.736	806.44	840.428
	Subtotal lost	1428.1	2564.83	3555.75	3913.92	4089.56	4088.63	3991.29	3850.53	3702.17	3418.79	3251.22	3148.57	3086.93	3053.22	3039.2	3039.19	3049.13	3066.06	3087.82	3112.87
	Deaths
	Not in care		696.473	571.734	498.905	427.196	380.252	344.401	315.26	293.743	278.66	268.414	261.595	257.118	254.207	252.328	251.12	250.347	249.853	249.538	249.338
	In care, Off ART		167.404	195.061	177.446	184.997	175.636	162.982	150.593	140.379	132.728	127.313	123.615	121.147	119.525	118.471	117.79	117.353	117.074	116.895	116.782
	ART1		2.52396	11.6275	22.2751	32.6796	43.0036	52.7362	61.6889	69.8165	77.172	84.4205	90.9205	96.8696	102.4	107.605	112.553	117.291	121.855	126.271	130.558
	ART2		0	1.11601	3.16011	6.0159	9.18071	12.508	15.8542	19.1383	22.3211	25.7702	28.969	32.0165	34.967	37.8546	40.7019	43.5245	46.3332	49.1356	51.9363
	Lost from care
	In Care, Off ART		39.8275	50.0366	59.8959	60.7964	62.6601	61.6572	58.7561	55.0733	51.4707	46.3223	43.2178	41.2616	40.0022	39.1849	38.6543	38.3105	38.0885	37.9457	37.8542
	In Care, Off ART (from Asympt)		0	21.2926	38.1701	45.8572	47.225	46.4003	44.7601	42.7402	40.5198	36.6447	33.7805	31.5886	29.9032	28.6189	27.6538	26.939	26.4166	26.0396	25.7702
	In Care, on ART1		0	0.200229	1.01029	2.21046	3.56252	4.97486	6.36674	7.68776	8.91223	9.67303	10.5512	11.4167	12.2335	12.9977	13.7151	14.3935	15.0396	15.6591	16.2563
	In Care, on ART2		0	0	0.0885348	0.289547	0.60431	0.993505	1.42825	1.88449	2.34523	2.70516	3.12219	3.54212	3.95118	4.34824	4.73551	5.11569	5.49109	5.86348	6.23416
	Subtotal lost		39.8275	71.5294	99.1648	109.154	114.052	114.026	111.311	107.386	103.248	95.3452	90.6717	87.809	86.09	85.1498	84.7587	84.7586	85.0359	85.5079	86.1148
	Subtotal - This period		906.228	851.068	800.952	760.042	722.124	686.654	654.707	630.463	614.129	601.263	595.771	594.96	597.189	601.408	606.924	613.274	620.151	627.348	634.728
AIDS
	Not in care	20197.7	16460.8	13459.6	6296.26	5030.2	4437.78	4011.22	3668.29	3413.15	3233.28	3110.64	3028.82	2975.01	2939.98	2917.35	2902.79	2893.47	2887.51	2883.72	2881.3
	In care, off ART	3982.81	6470.87	8074.25	11501	8143.67	6720.2	5995.27	5460.87	5041.06	4728.66	4507.54	4356.28	4255.16	4188.59	4145.23	4117.21	4099.19	4087.65	4080.28	4075.58
	In care, on ART1 to 12mo	2500.91	3089.92	2485.68	4627.89	6105.58	4786.24	4104.61	3717.07	3424.48	3195.24	2997.27	2866.73	2780.73	2725.14	2690.04	2668.6	2656.16	2649.58	2646.77	2646.37
	In care, on ART1 post 12 mo	0	2051.97	4449.44	6190.15	9571.63	13938.5	16929.6	19160.7	20923.9	22328.7	23451	24335.6	25053.7	25653	26166.4	26616.5	27018.9	27384	27719.2	28029.6
	In care, on ART2	0	47.7532	241.065	591.924	1042.71	1635.07	2297.61	2960.96	3602.56	4296.92	4905.01	5453.13	5951.54	6406.77	6823.82	7206.88	7559.58	7885.06	8186.09	8465.05
	Lost from care
	In Care, Off ART	248.844	287.908	442.649	570.327	799.388	651.388	535.745	468.161	422.151	357.69	329.967	312.941	301.576	293.981	288.964	285.687	283.563	282.196	281.318	280.758
	In Care, Off ART (from Int --> AIDS)		0	183.53	368.607	474.802	509.508	509.888	495.833	475.389	418.229	376.535	345.798	322.446	304.53	290.861	280.56	272.903	267.29	263.226	260.314
	In Care, Off ART (from Int)		343.29	505.364	625.318	658.964	682.288	678.678	652.893	615.585	532.96	476.596	441.66	419.729	405.692	396.612	390.72	386.902	384.435	382.846	381.826
	In Care, on ART1 to 12 mo		79.2922	115.077	103.641	169.093	230.067	201.394	173.596	155.31	131.107	120.328	112.487	107.211	103.719	101.449	100.007	99.1184	98.595	98.3104	98.1801
	In Care, on ART1 post 12 mo		0	22.1565	52.8245	78.2378	120.234	176.448	220.875	254.552	262.861	279.234	293.729	305.383	314.827	322.669	329.35	335.18	340.37	345.066	349.367
	In Care, on ART1 (from Int)		0	1.72586	9.08052	21.0123	35.241	50.4849	65.7715	80.4566	88.4914	96.2147	104.904	113.626	121.931	129.723	137.037	143.945	150.517	156.81	162.871
	In Care, on ART2		0	1.31064	6.89909	17.7347	32.4452	51.8775	74.2548	97.2899	112.991	134.327	154.112	172.026	188.305	203.161	216.763	229.25	240.741	251.342	261.142
	In Care, on ART2 (from Int)		0	0	0.763118	2.6604	5.78288	9.8113	14.4278	19.3565	23.0228	26.6572	30.7791	34.9966	39.1344	43.1571	47.0789	50.9248	54.7184	58.4786	62.2192
	Subtotal - pre-ART	248.844	631.198	1131.54	1564.25	1933.15	1843.18	1724.31	1616.89	1513.12	1308.88	1183.1	1100.4	1043.75	1004.2	976.437	956.967	943.369	933.921	927.39	922.898
	Subtotal - on ART	0	79.2922	140.27	173.208	288.738	423.77	490.016	548.925	606.965	618.473	656.761	696.012	733.242	767.917	800.159	830.236	858.418	884.942	910.007	933.778
	Subtotal lost	248.844	710.49	1271.81	1737.46	2221.89	2266.95	2214.33	2165.81	2120.09	1927.35	1839.86	1796.41	1776.99	1772.12	1776.6	1787.2	1801.79	1818.86	1837.4	1856.68
	Deaths
	Not in care		8291.45	6757.39	5525.35	2584.71	2064.97	1821.77	1646.67	1505.89	1401.15	1327.31	1276.96	1243.37	1221.28	1206.91	1197.61	1191.64	1187.81	1185.37	1183.81
	In care		1534.13	2492.5	3110.1	4430.03	3136.84	2588.54	2309.3	2103.46	1941.75	1821.42	1736.25	1677.98	1639.03	1613.39	1596.69	1585.9	1578.96	1574.51	1571.67
	ART1 to 12 mo		369.647	456.705	367.396	684.024	902.434	707.43	606.681	549.401	506.154	472.272	443.011	423.716	411.006	402.788	397.601	394.432	392.594	391.621	391.206
	ART1 post 12 mo		0	52.849	114.596	159.429	246.519	358.989	436.026	493.486	538.899	575.079	603.986	626.768	645.262	660.697	673.92	685.514	695.877	705.281	713.914
	ART2		0	4.49894	22.7112	55.7664	98.2361	154.044	216.463	278.959	339.405	404.822	462.111	513.751	560.708	603.596	642.887	678.976	712.205	742.869	771.229
	Lost from care
	In Care, Off ART		102.154	118.19	181.714	234.128	328.16	267.405	219.931	192.187	173.299	146.837	135.456	128.467	123.802	120.684	118.624	117.279	116.407	115.845	115.485
	In Care, Off ART (from Int-->AIDS)		0	0	75.3416	151.319	194.913	209.161	209.317	203.547	195.154	171.689	154.573	141.955	132.369	125.014	119.403	115.174	112.031	109.727	108.058
	In Care, Off ART (from Int)		0	140.926	207.459	256.702	270.514	280.089	278.607	268.022	252.707	218.788	195.65	181.308	172.305	166.543	162.815	160.396	158.829	157.816	157.164
	In Care, on ART1 to 12 mo		0	32.5506	47.2408	42.5462	69.4151	94.4459	82.6753	71.2636	63.7571	53.8215	49.3963	46.1776	44.0116	42.5781	41.6464	41.0545	40.6896	40.4747	40.3579
	In Care, on ART1 post 12 mo		0	0	9.09557	21.6853	32.1178	49.3577	72.4344	90.6725	104.497	107.908	114.63	120.58	125.364	129.241	132.46	135.203	137.596	139.727	141.655
	In Care, on ART1 (from Int)		0	0	0.70849	3.72769	8.62586	14.467	20.7248	27.0002	33.0286	36.327	39.4976	43.0648	46.645	50.0546	53.2533	56.2559	59.0917	61.7894	64.373
	In Care, on ART2		0	0	0.538036	2.83218	7.28036	13.3192	21.2965	30.4827	39.9389	46.3846	55.1431	63.2652	70.6194	77.3019	83.4006	88.9843	94.1104	98.8279	103.18
	In Care, on ART2 (from Int)		0	0	0	0.313271	1.09213	2.37396	4.02768	5.92284	7.94613	9.45122	10.9432	12.6353	14.3666	16.0653	17.7166	19.3266	20.9054	22.4627	24.0063
	Subtotal lost		102.154	291.667	522.098	713.253	912.119	930.618	909.014	889.097	870.328	791.207	755.289	737.453	729.482	727.481	729.319	733.673	739.66	746.67	754.279
	Subtotal - This period		10297.4	10055.6	9662.25	8627.21	7361.12	6561.39	6124.15	5820.29	5597.69	5392.11	5277.61	5223.05	5206.78	5214.86	5238.03	5270.13	5307.1	5346.32	5386.11

## Sheet: Model (SC)
		2004	2005	2006	2007	2008	2009	2010	2011	2012	2013	2014	2015	2016	2017	2018	2019	2020	2021	2022	2023
Asymptomatic
	Not in care	37328.9	35944.6	34129.4	31815.8	29383.7	27210.3	25832.8	24959.9	24406.6	24056	23833.8	23692.9	23603.7	23547.1	23511.3	23488.5	23474.1	23465	23459.2	23455.6
	In care, off ART	8625.51	5881.2	4600.85	4542.33	4345.43	4079.12	3801.54	3577.95	3415.36	3303.17	3228.06	3178.7	3146.65	3126	3112.76	3104.31	3098.92	3095.5	3093.32	3091.94
	Lost from care	3817.44	5168.12	5218.46	4858.92	4603.44	4374.26	4141.15	3902	3675.42	3438.73	3250.34	3104.75	2994.9	2913.6	2854.38	2811.8	2781.5	2760.14	2745.2	2734.81
	Deaths
	Not in care		678.827	653.654	620.644	578.572	534.344	494.82	469.771	453.896	443.835	437.459	433.418	430.857	429.234	428.205	427.553	427.14	426.878	426.712	426.607
	In care, off ART		147.178	100.351	78.5048	77.5063	74.1465	69.6023	64.866	61.0509	58.2766	56.3623	55.0807	54.2384	53.6915	53.3392	53.1133	52.9691	52.8772	52.8188	52.7816
	Lost from care		69.4203	93.9826	94.898	88.3596	83.7138	79.5461	75.3071	70.9581	66.8377	62.5335	59.1076	56.46	54.4623	52.984	51.9071	51.1327	50.5818	50.1934	49.9216
	Subtotal - This period		895.425	847.988	794.047	744.438	692.205	643.968	609.944	585.905	568.949	556.355	547.606	541.555	537.388	534.528	532.574	531.242	530.337	529.724	529.31
Intermediate
	Not in care	24973.4	20500.7	17889.3	15318	13634.7	12349.2	11304.3	10532.8	9991.93	9624.54	9380.01	9219.49	9115.12	9047.73	9004.42	8976.69	8958.99	8947.7	8940.52	8935.96
	In care, off ART	6397.3	7454.22	6781.06	7069.61	6711.88	6228.33	5754.86	5364.56	5072.17	4865.24	4723.9	4629.59	4567.61	4527.32	4501.32	4484.62	4473.94	4467.12	4462.78	4460.02
	In care, on ART1	499.086	2299.21	4404.66	6462.03	8503.49	10428	12198.3	13805.5	15259.9	16693.2	17978.5	19154.9	20248.5	21277.8	22256.1	23193	24095.5	24968.8	25816.4	26641
	In care, on ART2		220.68	624.877	1189.58	1815.39	2473.32	3134.99	3784.38	4413.74	5095.78	5728.31	6330.9	6914.35	7485.34	8048.36	8606.49	9161.89	9716.02	10269.8	10824
	Lost from care
	In Care, Off ART	1428.1	1794.16	2147.69	2179.98	2246.8	2210.85	2106.82	1974.76	1845.59	1660.98	1549.66	1479.52	1434.36	1405.06	1386.03	1373.7	1365.74	1360.62	1357.34	1355.24
	In Care, Off ART (from Asympt)		763.488	1368.67	1644.3	1693.35	1663.78	1604.96	1532.53	1452.92	1313.97	1211.27	1132.67	1072.24	1026.19	991.583	965.951	947.222	933.701	924.042	917.204
	In Care, on ART1		7.17961	36.226	79.2604	127.741	178.384	228.292	275.66	319.566	346.846	378.334	409.37	438.658	466.059	491.784	516.106	539.275	561.49	582.902	603.627
	In Care, on ART2		0	3.17459	10.3823	21.6688	35.6241	51.2129	67.5721	84.0929	96.999	111.953	127.01	141.678	155.915	169.801	183.434	196.894	210.247	223.538	236.801
	Subtotal - pre-ART	1428.1	2557.65	3516.35	3824.28	3940.15	3874.62	3711.79	3507.3	3298.51	2974.95	2760.93	2612.19	2506.6	2431.25	2377.61	2339.65	2312.96	2294.32	2281.38	2272.44
	Subtotal - on ART	0	7.17961	39.4005	89.6426	149.41	214.008	279.505	343.232	403.659	443.845	490.287	536.38	580.335	621.974	661.585	699.54	736.169	771.736	806.44	840.428
	Subtotal lost	1428.1	2564.83	3555.75	3913.92	4089.56	4088.63	3991.29	3850.53	3702.17	3418.79	3251.22	3148.57	3086.93	3053.22	3039.2	3039.19	3049.13	3066.06	3087.82	3112.87
	Deaths
	Not in care		696.473	571.734	498.905	427.196	380.252	344.401	315.26	293.743	278.66	268.414	261.595	257.118	254.207	252.328	251.12	250.347	249.853	249.538	249.338
	In care, Off ART		167.404	195.061	177.446	184.997	175.636	162.982	150.593	140.379	132.728	127.313	123.615	121.147	119.525	118.471	117.79	117.353	117.074	116.895	116.782
	ART1		2.52396	11.6275	22.2751	32.6796	43.0036	52.7362	61.6889	69.8165	77.172	84.4205	90.9205	96.8696	102.4	107.605	112.553	117.291	121.855	126.271	130.558
	ART2		0	1.11601	3.16011	6.0159	9.18071	12.508	15.8542	19.1383	22.3211	25.7702	28.969	32.0165	34.967	37.8546	40.7019	43.5245	46.3332	49.1356	51.9363
	Lost from care
	In Care, Off ART		39.8275	50.0366	59.8959	60.7964	62.6601	61.6572	58.7561	55.0733	51.4707	46.3223	43.2178	41.2616	40.0022	39.1849	38.6543	38.3105	38.0885	37.9457	37.8542
	In Care, Off ART (from Asympt)		0	21.2926	38.1701	45.8572	47.225	46.4003	44.7601	42.7402	40.5198	36.6447	33.7805	31.5886	29.9032	28.6189	27.6538	26.939	26.4166	26.0396	25.7702
	In Care, on ART1		0	0.200229	1.01029	2.21046	3.56252	4.97486	6.36674	7.68776	8.91223	9.67303	10.5512	11.4167	12.2335	12.9977	13.7151	14.3935	15.0396	15.6591	16.2563
	In Care, on ART2		0	0	0.0885348	0.289547	0.60431	0.993505	1.42825	1.88449	2.34523	2.70516	3.12219	3.54212	3.95118	4.34824	4.73551	5.11569	5.49109	5.86348	6.23416
	Subtotal lost		39.8275	71.5294	99.1648	109.154	114.052	114.026	111.311	107.386	103.248	95.3452	90.6717	87.809	86.09	85.1498	84.7587	84.7586	85.0359	85.5079	86.1148
	Subtotal - This period		906.228	851.068	800.952	760.042	722.124	686.654	654.707	630.463	614.129	601.263	595.771	594.96	597.189	601.408	606.924	613.274	620.151	627.348	634.728
AIDS
	Not in care	20197.7	16460.8	13459.6	6296.26	5030.2	4437.78	4011.22	3668.29	3413.15	3233.28	3110.64	3028.82	2975.01	2939.98	2917.35	2902.79	2893.47	2887.51	2883.72	2881.3
	In care, off ART	3982.81	6470.87	8074.25	11501	8143.67	6720.2	5995.27	5460.87	5041.06	4728.66	4507.54	4356.28	4255.16	4188.59	4145.23	4117.21	4099.19	4087.65	4080.28	4075.58
	In care, on ART1 to 12mo	2500.91	3089.92	2485.68	4627.89	6105.58	4786.24	4104.61	3717.07	3424.48	3259.48	3055.67	2922.91	2835.74	2779.67	2744.55	2723.37	2711.37	2705.36	2703.19	2703.47
	In care, on ART1 post 12 mo	0	2051.97	4449.44	6190.15	9571.63	13938.5	16929.6	19160.7	20923.9	22328.7	23503.7	24432.7	25190.3	25825.6	26372.2	26853.2	27284.6	27677.2	28038.5	28373.7
	In care, on ART2	0	47.7532	241.065	591.924	1042.71	1635.07	2297.61	2960.96	3602.56	4296.92	4905.01	5455.22	5956.97	6416.49	6838.53	7227.12	7585.76	7917.48	8224.96	8510.52
	Lost from care
	In Care, Off ART	248.844	287.908	442.649	570.327	799.388	651.388	535.745	468.161	422.151	357.69	329.967	312.941	301.576	293.981	288.964	285.687	283.563	282.196	281.318	280.758
	In Care, Off ART (from Int --> AIDS)		0	183.53	368.607	474.802	509.508	509.888	495.833	475.389	418.229	376.535	345.798	322.446	304.53	290.861	280.56	272.903	267.29	263.226	260.314
	In Care, Off ART (from Int)		343.29	505.364	625.318	658.964	682.288	678.678	652.893	615.585	532.96	476.596	441.66	419.729	405.692	396.612	390.72	386.902	384.435	382.846	381.826
	In Care, on ART1 to 12 mo		79.2922	115.077	103.641	169.093	230.067	201.394	173.596	155.31	131.107	122.365	114.634	109.303	105.766	103.476	102.03	101.148	100.64	100.375	100.268
	In Care, on ART1 post 12 mo		0	22.1565	52.8245	78.2378	120.234	176.448	220.875	254.552	262.861	279.234	294.298	306.514	316.467	324.77	331.877	338.102	343.664	348.709	353.342
	In Care, on ART1 (from Int)		0	1.72586	9.08052	21.0123	35.241	50.4849	65.7715	80.4566	88.4914	96.2147	104.904	113.626	121.931	129.723	137.037	143.945	150.517	156.81	162.871
	In Care, on ART2		0	1.31064	6.89909	17.7347	32.4452	51.8775	74.2548	97.2899	112.991	134.327	154.112	172.084	188.462	203.45	217.208	229.87	241.55	252.349	262.355
	In Care, on ART2 (from Int)		0	0	0.763118	2.6604	5.78288	9.8113	14.4278	19.3565	23.0228	26.6572	30.7791	34.9966	39.1344	43.1571	47.0789	50.9248	54.7184	58.4786	62.2192
	Subtotal - pre-ART	248.844	631.198	1131.54	1564.25	1933.15	1843.18	1724.31	1616.89	1513.12	1308.88	1183.1	1100.4	1043.75	1004.2	976.437	956.967	943.369	933.921	927.39	922.898
	Subtotal - on ART	0	79.2922	140.27	173.208	288.738	423.77	490.016	548.925	606.965	618.473	658.798	698.728	736.523	771.761	804.577	835.231	863.991	891.089	916.723	941.056
	Subtotal lost	248.844	710.49	1271.81	1737.46	2221.89	2266.95	2214.33	2165.81	2120.09	1927.35	1841.9	1799.13	1780.27	1775.96	1781.01	1792.2	1807.36	1825.01	1844.11	1863.95
	Deaths
	Not in care		8291.45	6757.39	5525.35	2584.71	2064.97	1821.77	1646.67	1505.89	1401.15	1327.31	1276.96	1243.37	1221.28	1206.91	1197.61	1191.64	1187.81	1185.37	1183.81
	In care		1534.13	2492.5	3110.1	4430.03	3136.84	2588.54	2309.3	2103.46	1941.75	1821.42	1736.25	1677.98	1639.03	1613.39	1596.69	1585.9	1578.96	1574.51	1571.67
	ART1 to 12 mo		369.647	456.705	367.396	684.024	902.434	707.43	606.681	549.401	506.154	481.767	451.642	432.02	419.136	410.85	405.658	402.527	400.754	399.865	399.545
	ART1 post 12 mo		0	52.849	114.596	159.429	246.519	358.989	436.026	493.486	538.899	575.079	605.343	629.269	648.782	665.143	679.22	691.61	702.721	712.832	722.137
	ART2		0	4.49894	22.7112	55.7664	98.2361	154.044	216.463	278.959	339.405	404.822	462.111	513.948	561.219	604.511	644.273	680.883	714.671	745.923	774.891
	Lost from care
	In Care, Off ART		102.154	118.19	181.714	234.128	328.16	267.405	219.931	192.187	173.299	146.837	135.456	128.467	123.802	120.684	118.624	117.279	116.407	115.845	115.485
	In Care, Off ART (from Int-->AIDS)		0	0	75.3416	151.319	194.913	209.161	209.317	203.547	195.154	171.689	154.573	141.955	132.369	125.014	119.403	115.174	112.031	109.727	108.058
	In Care, Off ART (from Int)		0	140.926	207.459	256.702	270.514	280.089	278.607	268.022	252.707	218.788	195.65	181.308	172.305	166.543	162.815	160.396	158.829	157.816	157.164
	In Care, on ART1 to 12 mo		0	32.5506	47.2408	42.5462	69.4151	94.4459	82.6753	71.2636	63.7571	53.8215	50.2324	47.059	44.8706	43.4186	42.4782	41.8846	41.5228	41.3142	41.2056
	In Care, on ART1 post 12 mo		0	0	9.09557	21.6853	32.1178	49.3577	72.4344	90.6725	104.497	107.908	114.63	120.814	125.829	129.914	133.323	136.24	138.796	141.079	143.15
	In Care, on ART1 (from Int)		0	0	0.70849	3.72769	8.62586	14.467	20.7248	27.0002	33.0286	36.327	39.4976	43.0648	46.645	50.0546	53.2533	56.2559	59.0917	61.7894	64.373
	In Care, on ART2		0	0	0.538036	2.83218	7.28036	13.3192	21.2965	30.4827	39.9389	46.3846	55.1431	63.2652	70.6429	77.3665	83.5194	89.1673	94.365	99.1598	103.593
	In Care, on ART2 (from Int)		0	0	0	0.313271	1.09213	2.37396	4.02768	5.92284	7.94613	9.45122	10.9432	12.6353	14.3666	16.0653	17.7166	19.3266	20.9054	22.4627	24.0063
	Subtotal lost		102.154	291.667	522.098	713.253	912.119	930.618	909.014	889.097	870.328	791.207	756.125	738.568	730.829	729.06	731.132	735.724	741.948	749.193	757.036
	Subtotal - This period		10297.4	10055.6	9662.25	8627.21	7361.12	6561.39	6124.15	5820.29	5597.69	5401.61	5288.43	5235.16	5220.29	5229.86	5254.59	5288.28	5326.86	5367.69	5409.09

## Sheet: Model (Matrix)
		2004	2005	2006	2007	2008	2009	2010	2011	2012	2013	2014	2015	2016	2017	2018	2019	2020	2021	2022	2023
Asymptomatic
	Not in care	37328.9	35944.6	34129.4	31815.8	29383.7	27210.3	25832.8	24959.9	24406.6	24056	23833.8	23692.9	23603.7	23547.1	23511.3	23488.5	23474.1	23465	23459.2	23455.6
	In care, off ART	8625.51	5881.2	4600.85	4542.33	4345.43	4079.12	3801.54	3577.95	3415.36	3303.17	3228.06	3178.7	3146.65	3126	3112.76	3104.31	3098.92	3095.5	3093.32	3091.94
	Lost from care	3817.44	5168.12	5218.46	4858.92	4603.44	4374.26	4141.15	3902	3675.42	3438.73	3250.34	3104.75	2994.9	2913.6	2854.38	2811.8	2781.5	2760.14	2745.2	2734.81
	Deaths
	Not in care		678.827	653.654	620.644	578.572	534.344	494.82	469.771	453.896	443.835	437.459	433.418	430.857	429.234	428.205	427.553	427.14	426.878	426.712	426.607
	In care, off ART		147.178	100.351	78.5048	77.5063	74.1465	69.6023	64.866	61.0509	58.2766	56.3623	55.0807	54.2384	53.6915	53.3392	53.1133	52.9691	52.8772	52.8188	52.7816
	Lost from care		69.4203	93.9826	94.898	88.3596	83.7138	79.5461	75.3071	70.9581	66.8377	62.5335	59.1076	56.46	54.4623	52.984	51.9071	51.1327	50.5818	50.1934	49.9216
	Subtotal - This period		895.425	847.988	794.047	744.438	692.205	643.968	609.944	585.905	568.949	556.355	547.606	541.555	537.388	534.528	532.574	531.242	530.337	529.724	529.31
Intermediate
	Not in care	24973.4	20500.7	17889.3	15318	13634.7	12349.2	11304.3	10532.8	9991.93	9624.54	9380.01	9219.49	9115.12	9047.73	9004.42	8976.69	8958.99	8947.7	8940.52	8935.96
	In care, off ART	6397.3	7454.22	6781.06	7069.61	6711.88	6228.33	5754.86	5364.56	5072.17	4865.24	4723.9	4629.59	4567.61	4527.32	4501.32	4484.62	4473.94	4467.12	4462.78	4460.02
	In care, on ART1	499.086	2299.21	4404.66	6462.03	8503.49	10428	12198.3	13805.5	15259.9	16693.2	17978.5	19154.9	20248.5	21277.8	22256.1	23193	24095.5	24968.8	25816.4	26641
	In care, on ART2		220.68	624.877	1189.58	1815.39	2473.32	3134.99	3784.38	4413.74	5095.78	5728.31	6330.9	6914.35	7485.34	8048.36	8606.49	9161.89	9716.02	10269.8	10824
	Lost from care
	In Care, Off ART	1428.1	1794.16	2147.69	2179.98	2246.8	2210.85	2106.82	1974.76	1845.59	1660.98	1549.66	1479.52	1434.36	1405.06	1386.03	1373.7	1365.74	1360.62	1357.34	1355.24
	In Care, Off ART (from Asympt)		763.488	1368.67	1644.3	1693.35	1663.78	1604.96	1532.53	1452.92	1313.97	1211.27	1132.67	1072.24	1026.19	991.583	965.951	947.222	933.701	924.042	917.204
	In Care, on ART1		7.17961	36.226	79.2604	127.741	178.384	228.292	275.66	319.566	346.846	378.334	409.37	438.658	466.059	491.784	516.106	539.275	561.49	582.902	603.627
	In Care, on ART2		0	3.17459	10.3823	21.6688	35.6241	51.2129	67.5721	84.0929	96.999	111.953	127.01	141.678	155.915	169.801	183.434	196.894	210.247	223.538	236.801
	Subtotal - pre-ART	1428.1	2557.65	3516.35	3824.28	3940.15	3874.62	3711.79	3507.3	3298.51	2974.95	2760.93	2612.19	2506.6	2431.25	2377.61	2339.65	2312.96	2294.32	2281.38	2272.44
	Subtotal - on ART	0	7.17961	39.4005	89.6426	149.41	214.008	279.505	343.232	403.659	443.845	490.287	536.38	580.335	621.974	661.585	699.54	736.169	771.736	806.44	840.428
	Subtotal lost	1428.1	2564.83	3555.75	3913.92	4089.56	4088.63	3991.29	3850.53	3702.17	3418.79	3251.22	3148.57	3086.93	3053.22	3039.2	3039.19	3049.13	3066.06	3087.82	3112.87
	Deaths
	Not in care		696.473	571.734	498.905	427.196	380.252	344.401	315.26	293.743	278.66	268.414	261.595	257.118	254.207	252.328	251.12	250.347	249.853	249.538	249.338
	In care, Off ART		167.404	195.061	177.446	184.997	175.636	162.982	150.593	140.379	132.728	127.313	123.615	121.147	119.525	118.471	117.79	117.353	117.074	116.895	116.782
	ART1		2.52396	11.6275	22.2751	32.6796	43.0036	52.7362	61.6889	69.8165	77.172	84.4205	90.9205	96.8696	102.4	107.605	112.553	117.291	121.855	126.271	130.558
	ART2		0	1.11601	3.16011	6.0159	9.18071	12.508	15.8542	19.1383	22.3211	25.7702	28.969	32.0165	34.967	37.8546	40.7019	43.5245	46.3332	49.1356	51.9363
	Lost from care
	In Care, Off ART		39.8275	50.0366	59.8959	60.7964	62.6601	61.6572	58.7561	55.0733	51.4707	46.3223	43.2178	41.2616	40.0022	39.1849	38.6543	38.3105	38.0885	37.9457	37.8542
	In Care, Off ART (from Asympt)		0	21.2926	38.1701	45.8572	47.225	46.4003	44.7601	42.7402	40.5198	36.6447	33.7805	31.5886	29.9032	28.6189	27.6538	26.939	26.4166	26.0396	25.7702
	In Care, on ART1		0	0.200229	1.01029	2.21046	3.56252	4.97486	6.36674	7.68776	8.91223	9.67303	10.5512	11.4167	12.2335	12.9977	13.7151	14.3935	15.0396	15.6591	16.2563
	In Care, on ART2		0	0	0.0885348	0.289547	0.60431	0.993505	1.42825	1.88449	2.34523	2.70516	3.12219	3.54212	3.95118	4.34824	4.73551	5.11569	5.49109	5.86348	6.23416
	Subtotal lost		39.8275	71.5294	99.1648	109.154	114.052	114.026	111.311	107.386	103.248	95.3452	90.6717	87.809	86.09	85.1498	84.7587	84.7586	85.0359	85.5079	86.1148
	Subtotal - This period		906.228	851.068	800.952	760.042	722.124	686.654	654.707	630.463	614.129	601.263	595.771	594.96	597.189	601.408	606.924	613.274	620.151	627.348	634.728
AIDS
	Not in care	20197.7	16460.8	13459.6	6296.26	5030.2	4437.78	4011.22	3668.29	3413.15	3233.28	3110.64	3028.82	2975.01	2939.98	2917.35	2902.79	2893.47	2887.51	2883.72	2881.3
	In care, off ART	3982.81	6470.87	8074.25	11501	8143.67	6720.2	5995.27	5460.87	5041.06	4728.66	4507.54	4356.28	4255.16	4188.59	4145.23	4117.21	4099.19	4087.65	4080.28	4075.58
	In care, on ART1 to 12mo	2500.91	3089.92	2485.68	4627.89	6105.58	4786.24	4104.61	3717.07	3424.48	3259.48	3055.67	2922.91	2835.74	2779.67	2744.55	2723.37	2711.37	2705.36	2703.19	2703.47
	In care, on ART1 post 12 mo	0	2051.97	4449.44	6190.15	9571.63	13938.5	16929.6	19160.7	20923.9	22328.7	23503.7	24432.7	25190.3	25825.6	26372.2	26853.2	27284.6	27677.2	28038.5	28373.7
	In care, on ART2	0	47.7532	241.065	591.924	1042.71	1635.07	2297.61	2960.96	3602.56	4296.92	4905.01	5455.22	5956.97	6416.49	6838.53	7227.12	7585.76	7917.48	8224.96	8510.52
	Lost from care
	In Care, Off ART	248.844	287.908	442.649	570.327	799.388	651.388	535.745	468.161	422.151	357.69	329.967	312.941	301.576	293.981	288.964	285.687	283.563	282.196	281.318	280.758
	In Care, Off ART (from Int --> AIDS)		0	183.53	368.607	474.802	509.508	509.888	495.833	475.389	418.229	376.535	345.798	322.446	304.53	290.861	280.56	272.903	267.29	263.226	260.314
	In Care, Off ART (from Int)		343.29	505.364	625.318	658.964	682.288	678.678	652.893	615.585	532.96	476.596	441.66	419.729	405.692	396.612	390.72	386.902	384.435	382.846	381.826
	In Care, on ART1 to 12 mo		79.2922	115.077	103.641	169.093	230.067	201.394	173.596	155.31	131.107	122.365	114.634	109.303	105.766	103.476	102.03	101.148	100.64	100.375	100.268
	In Care, on ART1 post 12 mo		0	22.1565	52.8245	78.2378	120.234	176.448	220.875	254.552	262.861	279.234	294.298	306.514	316.467	324.77	331.877	338.102	343.664	348.709	353.342
	In Care, on ART1 (from Int)		0	1.72586	9.08052	21.0123	35.241	50.4849	65.7715	80.4566	88.4914	96.2147	104.904	113.626	121.931	129.723	137.037	143.945	150.517	156.81	162.871
	In Care, on ART2		0	1.31064	6.89909	17.7347	32.4452	51.8775	74.2548	97.2899	112.991	134.327	154.112	172.084	188.462	203.45	217.208	229.87	241.55	252.349	262.355
	In Care, on ART2 (from Int)		0	0	0.763118	2.6604	5.78288	9.8113	14.4278	19.3565	23.0228	26.6572	30.7791	34.9966	39.1344	43.1571	47.0789	50.9248	54.7184	58.4786	62.2192
	Subtotal - pre-ART	248.844	631.198	1131.54	1564.25	1933.15	1843.18	1724.31	1616.89	1513.12	1308.88	1183.1	1100.4	1043.75	1004.2	976.437	956.967	943.369	933.921	927.39	922.898
	Subtotal - on ART	0	79.2922	140.27	173.208	288.738	423.77	490.016	548.925	606.965	618.473	658.798	698.728	736.523	771.761	804.577	835.231	863.991	891.089	916.723	941.056
	Subtotal lost	248.844	710.49	1271.81	1737.46	2221.89	2266.95	2214.33	2165.81	2120.09	1927.35	1841.9	1799.13	1780.27	1775.96	1781.01	1792.2	1807.36	1825.01	1844.11	1863.95
	Deaths
	Not in care		8291.45	6757.39	5525.35	2584.71	2064.97	1821.77	1646.67	1505.89	1401.15	1327.31	1276.96	1243.37	1221.28	1206.91	1197.61	1191.64	1187.81	1185.37	1183.81
	In care		1534.13	2492.5	3110.1	4430.03	3136.84	2588.54	2309.3	2103.46	1941.75	1821.42	1736.25	1677.98	1639.03	1613.39	1596.69	1585.9	1578.96	1574.51	1571.67
	ART1 to 12 mo		369.647	456.705	367.396	684.024	902.434	707.43	606.681	549.401	506.154	481.767	451.642	432.02	419.136	410.85	405.658	402.527	400.754	399.865	399.545
	ART1 post 12 mo		0	52.849	114.596	159.429	246.519	358.989	436.026	493.486	538.899	575.079	605.343	629.269	648.782	665.143	679.22	691.61	702.721	712.832	722.137
	ART2		0	4.49894	22.7112	55.7664	98.2361	154.044	216.463	278.959	339.405	404.822	462.111	513.948	561.219	604.511	644.273	680.883	714.671	745.923	774.891
	Lost from care
	In Care, Off ART		102.154	118.19	181.714	234.128	328.16	267.405	219.931	192.187	173.299	146.837	135.456	128.467	123.802	120.684	118.624	117.279	116.407	115.845	115.485
	In Care, Off ART (from Int-->AIDS)		0	0	75.3416	151.319	194.913	209.161	209.317	203.547	195.154	171.689	154.573	141.955	132.369	125.014	119.403	115.174	112.031	109.727	108.058
	In Care, Off ART (from Int)		0	140.926	207.459	256.702	270.514	280.089	278.607	268.022	252.707	218.788	195.65	181.308	172.305	166.543	162.815	160.396	158.829	157.816	157.164
	In Care, on ART1 to 12 mo		0	32.5506	47.2408	42.5462	69.4151	94.4459	82.6753	71.2636	63.7571	53.8215	50.2324	47.059	44.8706	43.4186	42.4782	41.8846	41.5228	41.3142	41.2056
	In Care, on ART1 post 12 mo		0	0	9.09557	21.6853	32.1178	49.3577	72.4344	90.6725	104.497	107.908	114.63	120.814	125.829	129.914	133.323	136.24	138.796	141.079	143.15
	In Care, on ART1 (from Int)		0	0	0.70849	3.72769	8.62586	14.467	20.7248	27.0002	33.0286	36.327	39.4976	43.0648	46.645	50.0546	53.2533	56.2559	59.0917	61.7894	64.373
	In Care, on ART2		0	0	0.538036	2.83218	7.28036	13.3192	21.2965	30.4827	39.9389	46.3846	55.1431	63.2652	70.6429	77.3665	83.5194	89.1673	94.365	99.1598	103.593
	In Care, on ART2 (from Int)		0	0	0	0.313271	1.09213	2.37396	4.02768	5.92284	7.94613	9.45122	10.9432	12.6353	14.3666	16.0653	17.7166	19.3266	20.9054	22.4627	24.0063
	Subtotal lost		102.154	291.667	522.098	713.253	912.119	930.618	909.014	889.097	870.328	791.207	756.125	738.568	730.829	729.06	731.132	735.724	741.948	749.193	757.036
	Subtotal - This period		10297.4	10055.6	9662.25	8627.21	7361.12	6561.39	6124.15	5820.29	5597.69	5401.61	5288.43	5235.16	5220.29	5229.86	5254.59	5288.28	5326.86	5367.69	5409.09

## Sheet: Model (Matrix calcs)
	TRANSITION PROBABILITY MATRIX																					PROPORTION OF 2004 POPULATION IN EACH STATE																				Number of individuals in each state
																						Period	Year	Asympt_NoCare	Asympt_InCare	Asympt_LTFU	Asympt_Dead	Int_NoCare	Int_InCare	Int_ART1	Int_ART2	Int_LTFU	Int_Dead	AIDS_NoCare	AIDS_InCare	AIDS_ART1ear	AIDS_ART1late	AIDS_ART2	AIDS_LTFU	AIDS_DEAD		Period	Year	Asympt_NoCare	Asympt_InCare	Asympt_LTFU	Asympt_Dead	Int_NoCare	Int_InCare
																						0	2004	0.339353	0.0784138	0.034704	0	0.227031	0.0581573	0.00453715	0	0.0129827	0	0.183615	0.0362073	0.0227356	0	0	0.00226222	0		0	2004	37328.9	8625.51	3817.44	0	24973.4	6397.3
																						1	2005	0.227093	0.0534655	0.046983	0.00814023	0.18637	0.0677657	0.0209019	0.00200618	0.0233167	0.00823844	0.149643	0.0588261	0.0280902	0.0186543	0.00043412	0.006459	0.0936125		1	2005	24980.3	5881.2	5168.12	895.425	20500.7	7454.22
																						2	2006	0.151969	0.0362131	0.0474406	0.00589637	0.142694	0.0560332	0.0400424	0.0056807	0.032325	0.00773698	0.12236	0.0734023	0.0225971	0.0404494	0.0021915	0.0115619	0.0914146		2	2006	16716.6	3983.45	5218.46	648.601	15696.4	6163.66
																						3	2007	0.0963122	0.0271164	0.04245	0.00424419	0.0981316	0.0479234	0.0578115	0.0108144	0.0345568	0.00657854	0.0512582	0.100903	0.0415722	0.0562741	0.00538112	0.0157951	0.0878386		3	2007	10594.3	2982.8	4669.5	466.861	10794.5	5271.57
																						4	2008	0.0610388	0.0190106	0.0363623	0.00298609	0.065846	0.0353642	0.0734045	0.0163402	0.0333875	0.00530159	0.0329793	0.0617718	0.0522066	0.086605	0.00947919	0.0197222	0.0744937		4	2008	6714.27	2091.16	3999.85	328.469	7243.06	3890.06
																						5	2009	0.038684	0.0128479	0.0298538	0.00209562	0.0434652	0.0245055	0.0857347	0.0217166	0.0296687	0.00414674	0.0220313	0.0401746	0.0351757	0.123625	0.0147602	0.0187646	0.0562684		5	2009	4255.24	1413.27	3283.92	230.518	4781.17	2695.6
																						6	2010	0.0245164	0.00849286	0.0236635	0.00146559	0.0283699	0.016435	0.0947746	0.0265318	0.0250081	0.00322425	0.014561	0.0269164	0.0241208	0.144185	0.0203476	0.0163987	0.0419958		6	2010	2696.8	934.215	2602.99	161.215	3120.69	1807.85
																						7	2011	0.0155375	0.00553596	0.0182381	0.00102107	0.0183706	0.0108149	0.100949	0.0306257	0.0204513	0.00253217	0.00951653	0.0178709	0.0168475	0.154294	0.0254303	0.014013	0.0322729		7	2011	1709.12	608.955	2006.19	112.317	2020.77	1189.64
																						8	2012	0.00984704	0.00357573	0.0137467	0.00070867	0.0118281	0.00703262	0.104814	0.034003	0.0164887	0.00203109	0.00616837	0.0117193	0.0117375	0.157757	0.029746	0.011889	0.0254027		8	2012	1083.17	393.331	1512.14	77.9537	1301.09	773.588
																						9	2013	0.00624066	0.00229563	0.0100395	0.000490067	0.00758428	0.00453767	0.107377	0.0370809	0.0125993	0.00167576	0.00397441	0.00761189	0.00853915	0.156795	0.0337154	0.00926963	0.0205273		9	2013	686.473	252.519	1104.34	53.9074	834.27	499.144
																						10	2014	0.00395508	0.00146779	0.00723512	0.000335226	0.00484843	0.00291248	0.108383	0.0394534	0.00993401	0.00141218	0.00254975	0.00491028	0.00587021	0.153273	0.0365639	0.00771027	0.0168457		10	2014	435.059	161.457	795.863	36.8748	533.327	320.373
																						11	2015	0.00250657	0.000935885	0.00515686	0.000228539	0.00309259	0.00186257	0.108322	0.0413308	0.00806324	0.00123611	0.00163061	0.00315218	0.00415179	0.147797	0.038596	0.00664	0.0143633		11	2015	275.723	102.947	567.255	25.1393	340.185	204.883
																						12	2016	0.00158857	0.000595605	0.00364174	0.000155329	0.00196938	0.0011881	0.107533	0.04285	0.00673674	0.00111668	0.00104038	0.00201655	0.00302283	0.14128	0.0399646	0.0058738	0.0126658		12	2016	174.742	65.5166	400.592	17.0862	216.632	130.691
																						13	2017	0.00100677	0.000378557	0.00255174	0.000105276	0.00125259	0.000756501	0.106253	0.0441051	0.00579262	0.0010344	0.000662661	0.00128683	0.00227822	0.134274	0.0407894	0.00530839	0.0114658		13	2017	110.745	41.6412	280.691	11.5804	137.785	83.2151
																						14	2018	0.00063805	0.00024039	0.00177608	7.11709e-05	0.000795964	0.000481065	0.104649	0.0451626	0.00511933	0.000976662	0.000421538	0.000819675	0.0017845	0.127127	0.0411681	0.00487987	0.0105847		14	2018	70.1855	26.4429	195.369	7.8288	87.556	52.9172
																						15	2019	0.000404371	0.000152558	0.00122912	4.80029e-05	0.000505458	0.00030563	0.10284	0.04607	0.00463782	0.000935181	0.000267899	0.00052142	0.00145442	0.120055	0.0411826	0.00454595	0.0099085		15	2019	44.4808	16.7814	135.203	5.28032	55.6004	33.6193
																						16	2020	0.000256274	9.67766e-05	0.000846364	3.23082e-05	0.000320818	0.000194043	0.100905	0.0468614	0.00429158	0.000904497	0.000170138	0.000331368	0.00123094	0.113187	0.0409013	0.00427779	0.0093639		16	2020	28.1901	10.6454	93.1001	3.5539	35.2899	21.3447
																						17	2021	0.000162416	6.13732e-05	0.000580263	2.17028e-05	0.000203549	0.000123137	0.0989024	0.0475612	0.00404027	0.000880991	0.000107995	0.000210437	0.00107682	0.106597	0.0403819	0.00405551	0.00890407		17	2021	17.8658	6.75105	63.8289	2.38731	22.3903	13.5451
																						18	2022	0.000102933	3.89134e-05	0.000396299	1.45529e-05	0.000129109	7.81136e-05	0.09687	0.0481869	0.00385524	0.000862268	6.85224e-05	0.000133569	0.000967805	0.100323	0.0396724	0.00386544	0.00849928		18	2022	11.3226	4.28047	43.5929	1.60082	14.202	8.5925
																						19	2023	6.52348e-05	2.46694e-05	0.000269737	9.74254e-06	8.18752e-05	4.95398e-05	0.0948341	0.0487511	0.00371627	0.000846739	4.34646e-05	8.4746e-05	0.00088817	0.0943803	0.0388131	0.00369819	0.0081309		19	2023	7.17583	2.71364	29.671	1.07168	9.00627	5.44938
	TRANSITION PROBABILITY MATRIX																					PROPORTION OF 2005 POPULATION IN EACH STATE																				Number of individuals in each state
	2005		Asympt_NoCare	Asympt_InCare	Asympt_LTFU	Asympt_Dead	Int_NoCare	Int_InCare	Int_ART1	Int_ART2	Int_LTFU	Int_Dead	AIDS_NoCare	AIDS_InCare	AIDS_ART1ear	AIDS_ART1late	AIDS_ART2	AIDS_LTFU	AIDS_DEAD	Total		Period	Year	Asympt_NoCare	Asympt_InCare	Asympt_LTFU	Asympt_Dead	Int_NoCare	Int_InCare	Int_ART1	Int_ART2	Int_LTFU	Int_Dead	AIDS_NoCare	AIDS_InCare	AIDS_ART1ear	AIDS_ART1late	AIDS_ART2	AIDS_LTFU	AIDS_DEAD		Period	Year	Asympt_NoCare	Asympt_InCare	Asympt_LTFU	Asympt_Dead	Int_NoCare	Int_InCare
	2005	Asympt_NoCare	0.669194	0.0563104	0	0.018185	0.2	0.0563104	0	0	0	0	0	0	0	0	0	0	0	1		0	2004	0	0	0	0	0	0	0	0	0	0	0	0	0	0	0	0	0		0	2004	0	0	0	0	0	0
	2005	Asympt_InCare	0	0.438142	0.306795	0.0170631	0	0.2	0.038	0	0	0	0	0	0	0	0	0	0	1		1	2005	1	0	0	0	0	0	0	0	0	0	0	0	0	0	0	0	0		1	2005	10964.4	0	0	0	0	0
	2005	Asympt_LTFU	0	0	0.660615	0.018185	0	0	0.1212	0	0.2	0	0	0	0	0	0	0	0	1		2	2006	0.669194	0.0563104	0	0.018185	0.2	0.0563104	0	0	0	0	0	0	0	0	0	0	0		2	2006	7337.29	617.408	0	199.387	2192.87	617.408
	2005	Asympt_Dead	0	0	0	0	0	0	0	0	0	0	0	0	0	0	0	0	0	0		3	2007	0.424109	0.0742107	0.0172758	0.0131302	0.22878	0.0959638	0.00937323	0	0.0102764	0.00705123	0.06	0.0366338	0.00501163	0	0	0	0		3	2007	4650.08	813.672	189.418	143.964	2508.42	1052.18
	2005	Int_NoCare	0	0	0	0	0.52195	0.0750805	0	0	0	0.0278885	0.3	0.0750805	0	0	0	0	0	1		4	2008	0.268783	0.0639104	0.0341801	0.00929286	0.193425	0.0951017	0.0278039	0.00163806	0.0256125	0.0092255	0.0727774	0.0844664	0.0270391	0.00411199	0	0.00478343	0.0394825		4	2008	2947.03	700.737	374.763	101.89	2120.78	1042.73
	2005	Int_InCare	0	0	0	0	0	0.273881	0.128456	0	0.182495	0.0261679	0	0.3	0.089	0	0	0	0	1		5	2009	0.170344	0.0478991	0.0421873	0.00659991	0.145576	0.0778176	0.0494317	0.00572735	0.0358546	0.00874613	0.0630532	0.092141	0.0496542	0.0260212	0.00104374	0.0130578	0.0684777		5	2009	1867.71	525.183	462.557	72.3638	1596.15	853.22
	2005	Int_ART1	0	0	0	0	0	0	0.971895	0.00866226	0.0143855	0.00505717	0	0	0	0	0	0	0	1		6	2010	0.107957	0.0335967	0.0425648	0.0046822	0.103175	0.0578715	0.0700417	0.0114762	0.0391663	0.00737511	0.0480272	0.0786186	0.0524409	0.0650147	0.00421864	0.0187388	0.0748439		6	2010	1183.68	368.367	466.696	51.3373	1131.24	634.524
	2005	Int_ART2	0	0	0	0	0	0	0	0.980557	0.0143855	0.00505717	0	0	0	0	0	0	0	1		7	2011	0.068419	0.0227119	0.0384263	0.00331051	0.0705689	0.0407447	0.0874808	0.0177934	0.0374342	0.00589631	0.034269	0.0597402	0.0450694	0.103676	0.00929044	0.0205621	0.0675142		7	2011	750.17	249.022	421.319	36.2977	773.743	446.74
	2005	Int_LTFU	0	0	0	0	0	0	0.1414	0.1515	0.438828	0.0278885	0	0	0	0	0	0.240383	0	1		8	2012	0.0433612	0.0150159	0.0323529	0.00233052	0.0471832	0.0277318	0.10107	0.0238766	0.0330626	0.00461064	0.0235372	0.0426095	0.0349943	0.133694	0.0152779	0.019752	0.0557271		8	2012	475.428	164.64	354.729	25.5527	517.334	304.062
	2005	Int_Dead	0	0	0	0	0	0	0	0	0	0	0	0	0	0	0	0	0	0		9	2013	0.0274806	0.00978902	0.0256528	0.00163308	0.0310703	0.0184655	0.111953	0.0299647	0.026502	0.0035955	0.0157804	0.0292571	0.0263177	0.153429	0.0220978	0.0162915	0.0442385		9	2013	301.307	107.33	281.267	17.9057	340.666	202.462
	2005	AIDS_NoCare	0	0	0	0	0	0	0	0	0	0	0.444047	0.0938507	0.0515874	0	0	0	0.410515	1		10	2014	0.0174161	0.0063233	0.0196908	0.00113327	0.0202454	0.0121162	0.119201	0.0349022	0.0211011	0.00280651	0.0104109	0.0196064	0.0185785	0.16472	0.027888	0.0135523	0.0343588		10	2014	190.957	69.3309	215.897	12.4255	221.978	132.846
	2005	AIDS_InCare	0	0	0	0	0	0	0	0	0	0	0	0.196117	0.35989	0	0	0.0588055	0.385187	1		11	2015	0.0110376	0.00405977	0.0147491	0.000782686	0.0130938	0.00787061	0.123643	0.0388792	0.0167734	0.00224948	0.00679256	0.0129277	0.0129776	0.168903	0.0326828	0.0113246	0.0270052		11	2015	121.021	44.5128	161.715	8.58165	143.565	86.2962
	2005	AIDS_ART1ear	0	0	0	0	0	0	0	0	0	0	0	0	0	0.82049	0	0.0317053	0.147805	1		12	2016	0.00699521	0.00259584	0.01084	0.000538205	0.00842322	0.00507705	0.125981	0.0420744	0.0134072	0.00186081	0.00439722	0.00842961	0.00904935	0.16821	0.0365048	0.00956754	0.0217644		12	2016	76.698	28.4617	118.854	5.90108	92.3552	55.6666
	2005	AIDS_ART1late	0	0	0	0	0	0	0	0	0	0	0	0	0	0.932853	0.0305939	0.0107977	0.0257552	1		13	2017	0.00443329	0.00165518	0.007848	0.000368628	0.00539759	0.00325891	0.126781	0.0446496	0.0108539	0.00159156	0.00283063	0.00545379	0.00635721	0.16434	0.0394324	0.00821177	0.0180887		13	2017	48.6082	18.148	86.0482	4.04177	59.1811	35.7319
	2005	AIDS_ART2	0	0	0	0	0	0	0	0	0	0	0	0	0	0	0.878342	0.0274461	0.0942122	1		14	2018	0.00280964	0.00105339	0.00561304	0.000251578	0.00344892	0.00208453	0.126483	0.0467433	0.00895495	0.00140546	0.00181475	0.00350891	0.00453877	0.158521	0.0415706	0.00717952	0.0155211		14	2018	30.8059	11.5497	61.5434	2.75839	37.8152	22.8556
	2005	AIDS_LTFU	0	0	0	0	0	0	0	0	0	0	0	0	0.1818	0	0.1919	0.215785	0.410515	1		15	2019	0.00178064	0.000669524	0.00397454	0.000171141	0.00219915	0.00133	0.125421	0.0484677	0.00756289	0.00127651	0.00116	0.00224856	0.00332095	0.151601	0.0430307	0.00639711	0.0137139		15	2019	19.5236	7.34091	43.5783	1.87645	24.1122	14.5826
	2005	AIDS_DEAD	0	0	0	0	0	0	0	0	0	0	0	0	0	0	0	0	0	0		16	2020	0.0011285	0.000425163	0.00279091	0.000116082	0.00140007	0.000847046	0.123836	0.0499103	0.00655237	0.00118643	0.000739851	0.00143671	0.00250845	0.144146	0.0439198	0.0058016	0.0124178		16	2020	12.3733	4.66164	30.6005	1.27277	15.3509	9.28731
																						17	2021	0.000715197	0.000269821	0.00194596	7.85291e-05	0.000890321	0.000538754	0.121906	0.0511377	0.00582284	0.00112261	0.000471114	0.000916037	0.00196604	0.136526	0.0443343	0.00534269	0.0114598		17	2021	7.84167	2.95842	21.3362	0.861021	9.7618	5.90709
																						18	2022	0.000453263	0.000171164	0.00134866	5.29973e-05	0.000565679	0.00034234	0.119756	0.0521992	0.00529682	0.00107643	0.00029963	0.000583145	0.001602	0.128971	0.0443586	0.00498202	0.0107232		18	2022	4.96974	1.8767	14.7872	0.581082	6.20231	3.75354
																						19	2023	0.00028726	0.000108548	0.000929835	3.56886e-05	0.000359183	0.000217381	0.117473	0.0531311	0.00491627	0.00104206	0.000190395	0.0003708	0.00135506	0.121626	0.0440651	0.00469123	0.0101304		19	2023	3.14962	1.19016	10.195	0.391303	3.93822	2.38345
	TRANSITION PROBABILITY MATRIX																					PROPORTION OF 2006 POPULATION IN EACH STATE																				Number of individuals in each state
	2006		Asympt_NoCare	Asympt_InCare	Asympt_LTFU	Asympt_Dead	Int_NoCare	Int_InCare	Int_ART1	Int_ART2	Int_LTFU	Int_Dead	AIDS_NoCare	AIDS_InCare	AIDS_ART1ear	AIDS_ART1late	AIDS_ART2	AIDS_LTFU	AIDS_DEAD	Total		Period	Year	Asympt_NoCare	Asympt_InCare	Asympt_LTFU	Asympt_Dead	Int_NoCare	Int_InCare	Int_ART1	Int_ART2	Int_LTFU	Int_Dead	AIDS_NoCare	AIDS_InCare	AIDS_ART1ear	AIDS_ART1late	AIDS_ART2	AIDS_LTFU	AIDS_DEAD		Period	Year	Asympt_NoCare	Asympt_InCare	Asympt_LTFU	Asympt_Dead	Int_NoCare	Int_InCare
	2006	Asympt_NoCare	0.669194	0.0563104	0	0.018185	0.2	0.0563104	0	0	0	0	0	0	0	0	0	0	0	1		0	2004	0	0	0	0	0	0	0	0	0	0	0	0	0	0	0	0	0		0	2004	0	0	0	0	0	0
	2006	Asympt_InCare	0	0.438142	0.306795	0.0170631	0	0.2	0.038	0	0	0	0	0	0	0	0	0	0	1		1	2005	0	0	0	0	0	0	0	0	0	0	0	0	0	0	0	0	0		1	2005	0	0	0	0	0	0
	2006	Asympt_LTFU	0	0	0.660615	0.018185	0	0	0.1212	0	0.2	0	0	0	0	0	0	0	0	1		2	2006	1	0	0	0	0	0	0	0	0	0	0	0	0	0	0	0	0		2	2006	10075.4	0	0	0	0	0
	2006	Asympt_Dead	0	0	0	0	0	0	0	0	0	0	0	0	0	0	0	0	0	0		3	2007	0.63376	0.0740274	0	0.018185	0.2	0.0740274	0	0	0	0	0	0	0	0	0	0	0		3	2007	6385.41	745.859	0	183.222	2015.09	745.859
	2006	Int_NoCare	0	0	0	0	0.52195	0.0750805	0	0	0	0.0278885	0.3	0.0750805	0	0	0	0	0	1		4	2008	0.401652	0.0793501	0.0227113	0.0127881	0.221693	0.101736	0.0123223	0	0.0135096	0.00751485	0.06	0.0419489	0.00658844	0	0	0	0		4	2008	4046.82	799.487	228.826	128.846	2233.65	1025.04
	2006	Int_InCare	0	0	0	0	0	0.273881	0.128456	0	0.182495	0.0261679	0	0.3	0.089	0	0	0	0	1		5	2009	0.254551	0.0644999	0.0393477	0.00907102	0.185569	0.0953488	0.0327229	0.00215345	0.0292143	0.00928401	0.0706514	0.0856971	0.0303098	0.00540575	0	0.0059232	0.0417629		5	2009	2564.71	649.864	396.445	91.3945	1869.69	960.681
	2006	Int_ART1	0	0	0	0	0	0	0.971895	0.00866226	0.0143855	0.00505717	0	0	0	0	0	0	0	1		6	2010	0.161324	0.0471038	0.0457819	0.00644513	0.139001	0.0761742	0.0554022	0.006821	0.038592	0.00866145	0.0605497	0.0905944	0.0503065	0.0299116	0.00130205	0.0143596	0.0690636		6	2010	1625.41	474.592	461.273	64.9375	1400.49	767.488
	2006	Int_ART2	0	0	0	0	0	0	0	0.980557	0.0143855	0.00505717	0	0	0	0	0	0	0	1		7	2011	0.102241	0.0325806	0.0446954	0.00456997	0.0982492	0.0559456	0.0764258	0.013015	0.0408882	0.0072608	0.0458816	0.0761124	0.0517326	0.0691791	0.00481436	0.0196566	0.0739758		7	2011	1030.12	328.263	450.326	46.0445	989.904	563.677
	2006	Int_LTFU	0	0	0	0	0	0	0.1414	0.1515	0.438828	0.0278885	0	0	0	0	0	0.240383	0	1		8	2012	0.0647962	0.0218435	0.039522	0.00322797	0.0670876	0.0391047	0.0939012	0.0196185	0.0383784	0.00579664	0.0326432	0.0573618	0.0438692	0.10698	0.0101172	0.0210656	0.0661036		8	2012	652.85	220.083	398.202	32.5232	675.937	393.997
	2006	Int_Dead	0	0	0	0	0	0	0	0	0	0	0	0	0	0	0	0	0	0		9	2013	0.0410652	0.0143673	0.0324112	0.00226975	0.044806	0.0264972	0.108507	0.02664	0.0319649	0.00453867	0.0223805	0.0407189	0.0344646	0.135791	0.0170528	0.0184787	0.0543359		9	2013	413.75	144.756	326.557	22.8687	451.44	266.971
	2006	AIDS_NoCare	0	0	0	0	0	0	0	0	0	0	0.444047	0.0938507	0.0515874	0	0	0	0.410515	1		10	2014	0.0260255	0.00933484	0.0254918	0.00158132	0.0294827	0.017593	0.118828	0.0325504	0.0259977	0.00351786	0.0149874	0.027877	0.0250596	0.154951	0.0234252	0.0157863	0.0426557		10	2014	262.218	94.0527	256.841	15.9325	297.051	177.257
	2006	AIDS_InCare	0	0	0	0	0	0	0	0	0	0	0	0.425589	0.130418	0	0	0.0588055	0.385187	1		11	2015	0.0164939	0.00601658	0.0194467	0.00109612	0.0192007	0.011522	0.125651	0.0374106	0.0208449	0.00277318	0.0098798	0.0186463	0.0177554	0.165108	0.028983	0.0132896	0.0332726		11	2015	166.184	60.6197	195.934	11.0439	193.455	116.089
	2006	AIDS_ART1ear	0	0	0	0	0	0	0	0	0	0	0	0	0	0.82049	0	0.0317053	0.147805	1		12	2016	0.0104532	0.00385712	0.0144962	0.000756243	0.0124134	0.00747514	0.12975	0.0413508	0.0166429	0.00224295	0.00644248	0.0122792	0.012426	0.168589	0.0335955	0.0111766	0.026301		12	2016	105.32	38.8622	146.056	7.61948	125.071	75.3153
	2006	AIDS_ART1late	0	0	0	0	0	0	0	0	0	0	0	0	0	0.932853	0.0305939	0.0107977	0.0257552	1		13	2017	0.00662481	0.00246379	0.0106133	0.00051952	0.00798336	0.00481779	0.131803	0.0445283	0.0133558	0.00187124	0.00416893	0.00799985	0.00868393	0.167464	0.0372624	0.00948072	0.0213064		13	2017	66.7479	24.8237	106.934	5.23439	80.4359	48.5413
	2006	AIDS_ART2	0	0	0	0	0	0	0	0	0	0	0	0	0	0	0.878342	0.0274461	0.0942122	1		14	2018	0.00419854	0.00156991	0.00766001	0.000355516	0.0051147	0.00309066	0.132363	0.0470975	0.0108598	0.00161293	0.0026829	0.00517267	0.0061179	0.163345	0.0400549	0.00816272	0.017792		14	2018	42.3022	15.8175	77.178	3.58198	51.5329	31.1397
	2006	AIDS_LTFU	0	0	0	0	0	0	0	0	0	0	0	0	0.1818	0	0.1919	0.215785	0.410515	1		15	2019	0.00266087	0.000998648	0.00546459	0.000242436	0.00326768	0.0019761	0.131861	0.049193	0.00900454	0.00143395	0.00171969	0.00332664	0.00438407	0.157396	0.0420755	0.00715606	0.0153296		15	2019	26.8094	10.0618	55.0582	2.44265	32.9234	19.9101
	2006	AIDS_DEAD	0	0	0	0	0	0	0	0	0	0	0	0	0	0	0	0	0	0		16	2020	0.00168635	0.000634527	0.00386118	0.000164802	0.00208336	0.00126045	0.130619	0.0509248	0.00764576	0.00130958	0.00109906	0.00213113	0.00322251	0.150425	0.0434344	0.00639172	0.0135908		16	2020	16.9907	6.39314	38.9031	1.66045	20.9908	12.6996
																						17	2021	0.00106874	0.000402849	0.00270643	0.000111709	0.00132625	0.00080259	0.128877	0.0523789	0.00666016	0.00122241	0.000700906	0.0013614	0.00244714	0.142968	0.0442371	0.00580909	0.0123385		17	2021	10.7681	4.05888	27.2684	1.12552	13.3626	8.08645
																						18	2022	0.000677327	0.000255621	0.00188416	7.55255e-05	0.000843327	0.000510405	0.126805	0.0536205	0.00594881	0.00116037	0.000446278	0.000867884	0.00192905	0.135376	0.0445787	0.0053593	0.0114084		18	2022	6.82436	2.5755	18.9838	0.760952	8.49689	5.14256
																						19	2023	0.000429263	0.000162139	0.0013041	5.09425e-05	0.000535797	0.000324294	0.124525	0.0546978	0.00543566	0.00111522	0.000283817	0.00055243	0.00158087	0.127869	0.044542	0.005005	0.0106892		19	2023	4.32501	1.63362	13.1394	0.513268	5.39839	3.26741
	TRANSITION PROBABILITY MATRIX																					PROPORTION OF 2007 POPULATION IN EACH STATE																				Number of individuals in each state
	2007		Asympt_NoCare	Asympt_InCare	Asympt_LTFU	Asympt_Dead	Int_NoCare	Int_InCare	Int_ART1	Int_ART2	Int_LTFU	Int_Dead	AIDS_NoCare	AIDS_InCare	AIDS_ART1ear	AIDS_ART1late	AIDS_ART2	AIDS_LTFU	AIDS_DEAD	Total		Period	Year	Asympt_NoCare	Asympt_InCare	Asympt_LTFU	Asympt_Dead	Int_NoCare	Int_InCare	Int_ART1	Int_ART2	Int_LTFU	Int_Dead	AIDS_NoCare	AIDS_InCare	AIDS_ART1ear	AIDS_ART1late	AIDS_ART2	AIDS_LTFU	AIDS_DEAD		Period	Year	Asympt_NoCare	Asympt_InCare	Asympt_LTFU	Asympt_Dead	Int_NoCare	Int_InCare
	2007	Asympt_NoCare	0.63376	0.0740274	0	0.018185	0.2	0.0740274	0	0	0	0	0	0	0	0	0	0	0	1		0	2004	0	0	0	0	0	0	0	0	0	0	0	0	0	0	0	0	0		0	2004	0	0	0	0	0	0
	2007	Asympt_InCare	0	0.438142	0.306795	0.0170631	0	0.2	0.038	0	0	0	0	0	0	0	0	0	0	1		1	2005	0	0	0	0	0	0	0	0	0	0	0	0	0	0	0	0	0		1	2005	0	0	0	0	0	0
	2007	Asympt_LTFU	0	0	0.660615	0.018185	0	0	0.1212	0	0.2	0	0	0	0	0	0	0	0	1		2	2006	0	0	0	0	0	0	0	0	0	0	0	0	0	0	0	0	0		2	2006	0	0	0	0	0	0
	2007	Asympt_Dead	0	0	0	0	0	0	0	0	0	0	0	0	0	0	0	0	0	0		3	2007	1	0	0	0	0	0	0	0	0	0	0	0	0	0	0	0	0		3	2007	10186	0	0	0	0	0
	2007	Int_NoCare	0	0	0	0	0.474705	0.0987032	0	0	0	0.0278885	0.3	0.0987032	0	0	0	0	0	1		4	2008	0.63376	0.0740274	0	0.018185	0.2	0.0740274	0	0	0	0	0	0	0	0	0	0	0		4	2008	6455.48	754.043	0	185.233	2037.2	754.043
	2007	Int_InCare	0	0	0	0	0	0.273881	0.128456	0	0.182495	0.0261679	0	0.3	0.089	0	0	0	0	1		5	2009	0.401652	0.0793501	0.0227113	0.0127881	0.221693	0.101736	0.0123223	0	0.0135096	0.00751485	0.06	0.0419489	0.00658844	0	0	0	0		5	2009	4091.23	808.26	231.337	130.26	2258.17	1036.29
	2007	Int_ART1	0	0	0	0	0	0	0.971895	0.00866226	0.0143855	0.00505717	0	0	0	0	0	0	0	1		6	2010	0.254551	0.0644999	0.0393477	0.00907102	0.185569	0.0953488	0.0327229	0.00215345	0.0292143	0.00928401	0.0706514	0.0856971	0.0303098	0.00540575	0	0.0059232	0.0417629		6	2010	2592.86	656.995	400.795	92.3974	1890.21	971.222
	2007	Int_ART2	0	0	0	0	0	0	0	0.980557	0.0143855	0.00505717	0	0	0	0	0	0	0	1		7	2011	0.161324	0.0471038	0.0457819	0.00644513	0.139001	0.0761742	0.0554022	0.006821	0.038592	0.00866145	0.0605497	0.0905944	0.0503065	0.0299116	0.00130205	0.0143596	0.0690636		7	2011	1643.25	479.799	466.334	65.65	1415.86	775.91
	2007	Int_LTFU	0	0	0	0	0	0	0.1414	0.1515	0.438828	0.0278885	0	0	0	0	0	0.240383	0	1		8	2012	0.102241	0.0325806	0.0446954	0.00456997	0.0982492	0.0559456	0.0764258	0.013015	0.0408882	0.0072608	0.0458816	0.0761124	0.0517326	0.0691791	0.00481436	0.0196566	0.0739758		8	2012	1041.43	331.866	455.268	46.5497	1000.77	569.862
	2007	Int_Dead	0	0	0	0	0	0	0	0	0	0	0	0	0	0	0	0	0	0		9	2013	0.0647962	0.0218435	0.0390706	0.00322797	0.0670876	0.0391047	0.0951785	0.0204445	0.0367265	0.00579664	0.0326432	0.0573618	0.0444648	0.10698	0.0109113	0.0196758	0.0661036		9	2013	660.014	222.498	397.973	32.8801	683.354	398.32
	2007	AIDS_NoCare	0	0	0	0	0	0	0	0	0	0	0.0690575	0.46884	0.0515874	0	0	0	0.410515	1		10	2014	0.0410652	0.0143673	0.0321175	0.00226154	0.044806	0.0264972	0.109422	0.0271774	0.0312467	0.00450324	0.0223805	0.0407189	0.0341699	0.13628	0.0174275	0.0179207	0.0539282		10	2014	418.29	146.345	327.149	23.036	456.394	269.9
	2007	AIDS_InCare	0	0	0	0	0	0	0	0	0	0	0	0.172217	0.38379	0	0	0.0588055	0.385187	1		11	2015	0.0260255	0.00933484	0.0253007	0.00157598	0.0294827	0.017593	0.119563	0.0329619	0.0256737	0.00350518	0.0149874	0.027877	0.0249413	0.155165	0.0236396	0.0155389	0.0424309		11	2015	265.096	95.0847	257.713	16.0529	300.311	179.202
	2007	AIDS_ART1ear	0	0	0	0	0	0	0	0	0	0	0	0	0	0.82049	0	0.0317053	0.147805	1		12	2016	0.0164939	0.00601658	0.0193224	0.00109265	0.0192007	0.011522	0.126288	0.0377649	0.0206941	0.00276995	0.0098798	0.0186463	0.0177029	0.16521	0.0291204	0.0131803	0.0331792		12	2016	168.007	61.2849	196.818	11.1297	195.578	117.363
	2007	AIDS_ART1late	0	0	0	0	0	0	0	0	0	0	0	0	0	0.932853	0.0305939	0.0107977	0.0257552	1		13	2017	0.0104532	0.00385712	0.0144154	0.000753983	0.0124134	0.00747514	0.130329	0.0416777	0.0165723	0.00224376	0.00644248	0.0122792	0.0124028	0.168642	0.0336939	0.0111277	0.0262639		13	2017	106.476	39.2886	146.835	7.68007	126.443	76.1417
	2007	AIDS_ART2	0	0	0	0	0	0	0	0	0	0	0	0	0	0	0.878342	0.0274461	0.0942122	1		14	2018	0.00662481	0.00246379	0.0105608	0.00051805	0.00798336	0.00481779	0.132343	0.0448418	0.0133245	0.00187384	0.00416893	0.00799985	0.00867356	0.167494	0.0373392	0.00945917	0.0212936		14	2018	67.4804	25.0961	107.572	5.27686	81.3185	49.074
	2007	AIDS_LTFU	0	0	0	0	0	0	0	0	0	0	0	0	0.1818	0	0.1919	0.215785	0.410515	1		15	2019	0.00419854	0.00156991	0.00762581	0.00035456	0.0051147	0.00309066	0.132876	0.0474042	0.0108491	0.00161637	0.0026829	0.00517267	0.00611333	0.163364	0.0401182	0.00815417	0.0177896		15	2019	42.7664	15.9911	77.6765	3.61155	52.0984	31.4814
	2007	AIDS_DEAD	0	0	0	0	0	0	0	0	0	0	0	0	0	0	0	0	0	0		16	2020	0.00266087	0.000998648	0.00544234	0.000241814	0.00326768	0.0019761	0.132353	0.0494963	0.00900522	0.00143779	0.00171969	0.00332664	0.00438225	0.157411	0.0421297	0.00715404	0.0153319		16	2020	27.1036	10.1722	55.4357	2.46312	33.2846	20.1285
																						17	2021	0.00168635	0.000634527	0.0038467	0.000164397	0.00208336	0.00126045	0.131095	0.0512266	0.00765303	0.00131363	0.00109906	0.00213113	0.00322209	0.150437	0.0434819	0.00639318	0.0135952		17	2021	17.1772	6.46329	39.1825	1.67455	21.2211	12.839
																						18	2022	0.00106874	0.000402849	0.00269701	0.000111446	0.00132625	0.00080259	0.129338	0.0526802	0.00667134	0.00122655	0.000700906	0.0013614	0.00244745	0.142979	0.0442796	0.00581247	0.0123439		18	2022	10.8862	4.10342	27.4717	1.13519	13.5092	8.17518
																						19	2023	0.000677327	0.000255621	0.00187804	7.53542e-05	0.000843327	0.000510405	0.127254	0.0539218	0.00596235	0.00116454	0.000446278	0.000867884	0.00192977	0.135387	0.0446171	0.00536377	0.0114141		19	2023	6.89925	2.60376	19.1297	0.767558	8.59013	5.19899
	TRANSITION PROBABILITY MATRIX																					PROPORTION OF 2008 POPULATION IN EACH STATE																				Number of individuals in each state
	2008		Asympt_NoCare	Asympt_InCare	Asympt_LTFU	Asympt_Dead	Int_NoCare	Int_InCare	Int_ART1	Int_ART2	Int_LTFU	Int_Dead	AIDS_NoCare	AIDS_InCare	AIDS_ART1ear	AIDS_ART1late	AIDS_ART2	AIDS_LTFU	AIDS_DEAD	Total		Period	Year	Asympt_NoCare	Asympt_InCare	Asympt_LTFU	Asympt_Dead	Int_NoCare	Int_InCare	Int_ART1	Int_ART2	Int_LTFU	Int_Dead	AIDS_NoCare	AIDS_InCare	AIDS_ART1ear	AIDS_ART1late	AIDS_ART2	AIDS_LTFU	AIDS_DEAD		Period	Year	Asympt_NoCare	Asympt_InCare	Asympt_LTFU	Asympt_Dead	Int_NoCare	Int_InCare
	2008	Asympt_NoCare	0.63376	0.0740274	0	0.018185	0.2	0.0740274	0	0	0	0	0	0	0	0	0	0	0	1		0	2004	0	0	0	0	0	0	0	0	0	0	0	0	0	0	0	0	0		0	2004	0	0	0	0	0	0
	2008	Asympt_InCare	0	0.438142	0.306795	0.0170631	0	0.2	0.038	0	0	0	0	0	0	0	0	0	0	1		1	2005	0	0	0	0	0	0	0	0	0	0	0	0	0	0	0	0	0		1	2005	0	0	0	0	0	0
	2008	Asympt_LTFU	0	0	0.660615	0.018185	0	0	0.1212	0	0.2	0	0	0	0	0	0	0	0	1		2	2006	0	0	0	0	0	0	0	0	0	0	0	0	0	0	0	0	0		2	2006	0	0	0	0	0	0
	2008	Asympt_Dead	0	0	0	0	0	0	0	0	0	0	0	0	0	0	0	0	0	0		3	2007	0	0	0	0	0	0	0	0	0	0	0	0	0	0	0	0	0		3	2007	0	0	0	0	0	0
	2008	Int_NoCare	0	0	0	0	0.474705	0.0987032	0	0	0	0.0278885	0.3	0.0987032	0	0	0	0	0	1		4	2008	1	0	0	0	0	0	0	0	0	0	0	0	0	0	0	0	0		4	2008	9220.12	0	0	0	0	0
	2008	Int_InCare	0	0	0	0	0	0.273881	0.128456	0	0.182495	0.0261679	0	0.3	0.089	0	0	0	0	1		5	2009	0.63376	0.0740274	0	0.018185	0.2	0.0740274	0	0	0	0	0	0	0	0	0	0	0		5	2009	5843.34	682.542	0	167.668	1844.02	682.542
	2008	Int_ART1	0	0	0	0	0	0	0.971895	0.00866226	0.0143855	0.00505717	0	0	0	0	0	0	0	1		6	2010	0.401652	0.0793501	0.0227113	0.0127881	0.221693	0.101736	0.0123223	0	0.0135096	0.00751485	0.06	0.0419489	0.00658844	0	0	0	0		6	2010	3703.28	731.618	209.401	117.908	2044.04	938.022
	2008	Int_ART2	0	0	0	0	0	0	0	0.980557	0.0143855	0.00505717	0	0	0	0	0	0	0	1		7	2011	0.254551	0.0644999	0.0393477	0.00907102	0.185569	0.0953488	0.0327229	0.00215345	0.0292143	0.00928401	0.0706514	0.0856971	0.0303098	0.00540575	0	0.0059232	0.0417629		7	2011	2346.99	594.696	362.79	83.6359	1710.97	879.127
	2008	Int_LTFU	0	0	0	0	0	0	0.1414	0.1515	0.438828	0.0278885	0	0	0	0	0	0.240383	0	1		8	2012	0.161324	0.0471038	0.0457819	0.00644513	0.139001	0.0761742	0.0554022	0.006821	0.038592	0.00866145	0.0605497	0.0905944	0.0503065	0.0299116	0.00130205	0.0143596	0.0690636		8	2012	1487.43	434.303	422.115	59.4248	1281.6	702.335
	2008	Int_Dead	0	0	0	0	0	0	0	0	0	0	0	0	0	0	0	0	0	0		9	2013	0.102241	0.0325806	0.044233	0.00456997	0.0982492	0.0559456	0.0776678	0.0137945	0.039329	0.0072608	0.0458816	0.0761124	0.0521677	0.0691791	0.00539448	0.0186414	0.0739758		9	2013	942.673	300.397	407.834	42.1357	905.869	515.826
	2008	AIDS_NoCare	0	0	0	0	0	0	0	0	0	0	0.0690575	0.46884	0.0515874	0	0	0	0.410515	1		10	2014	0.0647962	0.0218435	0.0387698	0.00321956	0.0670876	0.0391047	0.0960729	0.0209519	0.0360419	0.00576338	0.0326432	0.0573618	0.0442495	0.107337	0.011185	0.0191835	0.0658058		10	2014	597.428	201.4	357.462	29.6847	618.555	360.55
	2008	AIDS_InCare	0	0	0	0	0	0	0	0	0	0	0	0.135546	0.420461	0	0	0.0588055	0.385187	1		11	2015	0.0410652	0.0143673	0.0319218	0.00225607	0.044806	0.0264972	0.110141	0.0275652	0.030934	0.00449123	0.0223805	0.0407189	0.0340654	0.136436	0.0175645	0.0176892	0.0537292		11	2015	378.626	132.468	294.323	20.8012	413.117	244.307
	2008	AIDS_ART1ear	0	0	0	0	0	0	0	0	0	0	0	0	0	0.82049	0	0.0317053	0.147805	1		12	2016	0.0260255	0.00933484	0.0251734	0.00157242	0.0294827	0.017593	0.120185	0.0332947	0.0255259	0.00350206	0.0149874	0.027877	0.0248922	0.155225	0.0237109	0.0154323	0.0423374		12	2016	239.958	86.0684	232.102	14.4979	271.834	162.209
	2008	AIDS_ART1late	0	0	0	0	0	0	0	0	0	0	0	0	0	0.932853	0.0305939	0.0107977	0.0257552	1		13	2017	0.0164939	0.00601658	0.0192396	0.00109034	0.0192007	0.011522	0.126853	0.0380712	0.0206235	0.00277066	0.0098798	0.0186463	0.0176803	0.165226	0.0291602	0.0131304	0.0331365		13	2017	152.076	55.4736	177.391	10.053	177.033	106.234
	2008	AIDS_ART2	0	0	0	0	0	0	0	0	0	0	0	0	0	0	0.878342	0.0274461	0.0942122	1		14	2018	0.0104532	0.00385712	0.0143615	0.000752477	0.0124134	0.00747514	0.130855	0.0419709	0.0165401	0.00224619	0.00644248	0.0122792	0.0123922	0.168638	0.0337177	0.011104	0.0262442		14	2018	96.3797	35.5631	132.415	6.93793	114.453	68.9217
	2008	AIDS_LTFU	0	0	0	0	0	0	0	0	0	0	0	0	0.1818	0	0.1919	0.215785	0.410515	1		15	2019	0.00662481	0.00246379	0.0105257	0.000517071	0.00798336	0.00481779	0.132843	0.0451283	0.0133127	0.00187709	0.00416893	0.00799985	0.00866853	0.167482	0.0373544	0.00944828	0.0212844		15	2019	61.0816	22.7164	97.0483	4.76745	73.6075	44.4206
	2008	AIDS_DEAD	0	0	0	0	0	0	0	0	0	0	0	0	0	0	0	0	0	0		16	2020	0.00419854	0.00156991	0.00760301	0.000353923	0.0051147	0.00309066	0.133355	0.0476874	0.0108487	0.00162002	0.0026829	0.00517267	0.00611102	0.163349	0.0401287	0.00814988	0.0177855		16	2020	38.7111	14.4747	70.1007	3.26321	47.1582	28.4962
																						17	2021	0.00266087	0.000998648	0.00542751	0.000241399	0.00326768	0.0019761	0.132815	0.0497781	0.00901146	0.00144163	0.00171969	0.00332664	0.00438135	0.157394	0.0421374	0.00715337	0.0153304		17	2021	24.5335	9.20766	50.0423	2.22573	30.1284	18.2199
																						18	2022	0.00168635	0.000634527	0.00383706	0.000164128	0.00208336	0.00126045	0.131543	0.051508	0.00766325	0.00131756	0.00109906	0.00213113	0.00322194	0.150421	0.0434881	0.00639459	0.0135951		18	2022	15.5484	5.85041	35.3781	1.51328	19.2088	11.6215
																						19	2023	0.00106874	0.000402849	0.00269073	0.00011127	0.00132625	0.00080259	0.129774	0.0529618	0.00668398	0.00123052	0.000700906	0.0013614	0.00244775	0.142964	0.0442848	0.00581512	0.0123446		19	2023	9.85394	3.71432	24.8089	1.02593	12.2282	7.39997
	TRANSITION PROBABILITY MATRIX																					PROPORTION OF 2009 POPULATION IN EACH STATE																				Number of individuals in each state
	2009		Asympt_NoCare	Asympt_InCare	Asympt_LTFU	Asympt_Dead	Int_NoCare	Int_InCare	Int_ART1	Int_ART2	Int_LTFU	Int_Dead	AIDS_NoCare	AIDS_InCare	AIDS_ART1ear	AIDS_ART1late	AIDS_ART2	AIDS_LTFU	AIDS_DEAD	Total		Period	Year	Asympt_NoCare	Asympt_InCare	Asympt_LTFU	Asympt_Dead	Int_NoCare	Int_InCare	Int_ART1	Int_ART2	Int_LTFU	Int_Dead	AIDS_NoCare	AIDS_InCare	AIDS_ART1ear	AIDS_ART1late	AIDS_ART2	AIDS_LTFU	AIDS_DEAD		Period	Year	Asympt_NoCare	Asympt_InCare	Asympt_LTFU	Asympt_Dead	Int_NoCare	Int_InCare
	2009	Asympt_NoCare	0.63376	0.0740274	0	0.018185	0.2	0.0740274	0	0	0	0	0	0	0	0	0	0	0	1		0	2004	0	0	0	0	0	0	0	0	0	0	0	0	0	0	0	0	0		0	2004	0	0	0	0	0	0
	2009	Asympt_InCare	0	0.438142	0.306795	0.0170631	0	0.2	0.038	0	0	0	0	0	0	0	0	0	0	1		1	2005	0	0	0	0	0	0	0	0	0	0	0	0	0	0	0	0	0		1	2005	0	0	0	0	0	0
	2009	Asympt_LTFU	0	0	0.660615	0.018185	0	0	0.1212	0	0.2	0	0	0	0	0	0	0	0	1		2	2006	0	0	0	0	0	0	0	0	0	0	0	0	0	0	0	0	0		2	2006	0	0	0	0	0	0
	2009	Asympt_Dead	0	0	0	0	0	0	0	0	0	0	0	0	0	0	0	0	0	0		3	2007	0	0	0	0	0	0	0	0	0	0	0	0	0	0	0	0	0		3	2007	0	0	0	0	0	0
	2009	Int_NoCare	0	0	0	0	0.474705	0.0987032	0	0	0	0.0278885	0.3	0.0987032	0	0	0	0	0	1		4	2008	0	0	0	0	0	0	0	0	0	0	0	0	0	0	0	0	0		4	2008	0	0	0	0	0	0
	2009	Int_InCare	0	0	0	0	0	0.273881	0.128456	0	0.182495	0.0261679	0	0.3	0.089	0	0	0	0	1		5	2009	1	0	0	0	0	0	0	0	0	0	0	0	0	0	0	0	0		5	2009	8588.04	0	0	0	0	0
	2009	Int_ART1	0	0	0	0	0	0	0.971895	0.00866226	0.0143855	0.00505717	0	0	0	0	0	0	0	1		6	2010	0.63376	0.0740274	0	0.018185	0.2	0.0740274	0	0	0	0	0	0	0	0	0	0	0		6	2010	5442.76	635.751	0	156.174	1717.61	635.751
	2009	Int_ART2	0	0	0	0	0	0	0	0.980557	0.0143855	0.00505717	0	0	0	0	0	0	0	1		7	2011	0.401652	0.0793501	0.0227113	0.0127881	0.221693	0.101736	0.0123223	0	0.0135096	0.00751485	0.06	0.0419489	0.00658844	0	0	0	0		7	2011	3449.4	681.462	195.045	109.825	1903.91	873.717
	2009	Int_LTFU	0	0	0	0	0	0	0.1414	0.1515	0.438828	0.0278885	0	0	0	0	0	0.240383	0	1		8	2012	0.254551	0.0644999	0.0393477	0.00907102	0.185569	0.0953488	0.0327229	0.00215345	0.0292143	0.00928401	0.0706514	0.0856971	0.0303098	0.00540575	0	0.0059232	0.0417629		8	2012	2186.09	553.927	337.919	77.9023	1593.68	818.859
	2009	Int_Dead	0	0	0	0	0	0	0	0	0	0	0	0	0	0	0	0	0	0		9	2013	0.161324	0.0471038	0.0453845	0.00644513	0.139001	0.0761742	0.0563898	0.00741113	0.0374117	0.00866145	0.0605497	0.0905944	0.0504859	0.0299116	0.00154134	0.0139408	0.0690636		9	2013	1385.46	404.529	389.764	55.351	1193.74	654.187
	2009	AIDS_NoCare	0	0	0	0	0	0	0	0	0	0	0.0690575	0.46884	0.0515874	0	0	0	0.410515	1		10	2014	0.102241	0.0325806	0.0439745	0.00456274	0.0982492	0.0559456	0.0783846	0.0141791	0.038802	0.00723586	0.0458816	0.0761124	0.0520789	0.0693263	0.00550739	0.0183092	0.073853		10	2014	878.048	279.803	377.655	39.185	843.768	480.463
	2009	AIDS_InCare	0	0	0	0	0	0	0	0	0	0	0	0.1231	0.432907	0	0	0.0588055	0.385187	1		11	2015	0.0647962	0.0218435	0.0386016	0.00321486	0.0670876	0.0391047	0.0966505	0.0212447	0.0357961	0.00575425	0.0326432	0.0573618	0.0441791	0.107402	0.0112115	0.0190105	0.0656707		11	2015	556.472	187.593	331.512	27.6093	576.151	335.833
	2009	AIDS_ART1ear	0	0	0	0	0	0	0	0	0	0	0	0	0	0.82049	0	0.0317053	0.147805	1		12	2016	0.0410652	0.0143673	0.0318124	0.00225301	0.044806	0.0264972	0.110641	0.0278151	0.0308149	0.00448878	0.0223805	0.0407189	0.0340287	0.136438	0.0175495	0.0176042	0.0536519		12	2016	352.67	123.387	273.206	19.349	384.796	227.559
	2009	AIDS_ART1late	0	0	0	0	0	0	0	0	0	0	0	0	0	0.932853	0.0305939	0.0107977	0.0257552	1		13	2017	0.0260255	0.00933484	0.0251023	0.00157043	0.0294827	0.017593	0.120637	0.0335236	0.0254674	0.00350253	0.0149874	0.027877	0.0248741	0.155197	0.0236781	0.0153898	0.0422957		13	2017	223.508	80.168	215.579	13.4869	253.199	151.089
	2009	AIDS_ART2	0	0	0	0	0	0	0	0	0	0	0	0	0	0	0.878342	0.0274461	0.0942122	1		14	2018	0.0164939	0.00601658	0.0191933	0.00108904	0.0192007	0.011522	0.127273	0.0382895	0.0205957	0.00277247	0.0098798	0.0186463	0.0176713	0.165185	0.0291206	0.0131084	0.0331126		14	2018	141.65	51.6707	164.833	9.35274	164.896	98.9512
	2009	AIDS_LTFU	0	0	0	0	0	0	0	0	0	0	0	0	0.1818	0	0.1919	0.215785	0.410515	1		15	2019	0.0104532	0.00385712	0.0143314	0.000751635	0.0124134	0.00747514	0.131253	0.0421838	0.016529	0.00224865	0.00644248	0.0122792	0.0123875	0.168593	0.0336766	0.0110923	0.0262291		15	2019	89.7724	33.1251	123.078	6.45507	106.607	64.1968
	2009	AIDS_DEAD	0	0	0	0	0	0	0	0	0	0	0	0	0	0	0	0	0	0		16	2020	0.00662481	0.00246379	0.0105061	0.000516523	0.00798336	0.00481779	0.133224	0.0453386	0.013311	0.00187987	0.00416893	0.00799985	0.00866606	0.167436	0.0373142	0.00944214	0.0212739		16	2020	56.8942	21.1591	90.227	4.43592	68.5614	41.3754
																						17	2021	0.00419854	0.00156991	0.00759027	0.000353567	0.0051147	0.00309066	0.133722	0.0478967	0.0108527	0.00162296	0.0026829	0.00517267	0.00610972	0.163304	0.0400906	0.0081469	0.0177777		17	2021	36.0573	13.4824	65.1855	3.03645	43.9253	26.5427
																						18	2022	0.00266087	0.000998648	0.00541922	0.000241168	0.00326768	0.0019761	0.133171	0.0499872	0.00901878	0.00144466	0.00171969	0.00332664	0.00438071	0.157351	0.0421018	0.00715231	0.0153242		18	2022	22.8516	8.57643	46.5405	2.07116	28.063	16.9708
																						19	2023	0.00168635	0.000634527	0.00383167	0.000163977	0.00208336	0.00126045	0.131889	0.0517174	0.00767264	0.00132063	0.00109906	0.00213113	0.00322172	0.15038	0.0434553	0.00639473	0.0135901		19	2023	14.4825	5.44934	32.9065	1.40824	17.892	10.8248
	TRANSITION PROBABILITY MATRIX																					PROPORTION OF 2010 POPULATION IN EACH STATE																				Number of individuals in each state
	2010		Asympt_NoCare	Asympt_InCare	Asympt_LTFU	Asympt_Dead	Int_NoCare	Int_InCare	Int_ART1	Int_ART2	Int_LTFU	Int_Dead	AIDS_NoCare	AIDS_InCare	AIDS_ART1ear	AIDS_ART1late	AIDS_ART2	AIDS_LTFU	AIDS_DEAD	Total		Period	Year	Asympt_NoCare	Asympt_InCare	Asympt_LTFU	Asympt_Dead	Int_NoCare	Int_InCare	Int_ART1	Int_ART2	Int_LTFU	Int_Dead	AIDS_NoCare	AIDS_InCare	AIDS_ART1ear	AIDS_ART1late	AIDS_ART2	AIDS_LTFU	AIDS_DEAD		Period	Year	Asympt_NoCare	Asympt_InCare	Asympt_LTFU	Asympt_Dead	Int_NoCare	Int_InCare
	2010	Asympt_NoCare	0.63376	0.0740274	0	0.018185	0.2	0.0740274	0	0	0	0	0	0	0	0	0	0	0	1		0	2004	0	0	0	0	0	0	0	0	0	0	0	0	0	0	0	0	0		0	2004	0	0	0	0	0	0
	2010	Asympt_InCare	0	0.438142	0.306795	0.0170631	0	0.2	0.038	0	0	0	0	0	0	0	0	0	0	1		1	2005	0	0	0	0	0	0	0	0	0	0	0	0	0	0	0	0	0		1	2005	0	0	0	0	0	0
	2010	Asympt_LTFU	0	0	0.660615	0.018185	0	0	0.1212	0	0.2	0	0	0	0	0	0	0	0	1		2	2006	0	0	0	0	0	0	0	0	0	0	0	0	0	0	0	0	0		2	2006	0	0	0	0	0	0
	2010	Asympt_Dead	0	0	0	0	0	0	0	0	0	0	0	0	0	0	0	0	0	0		3	2007	0	0	0	0	0	0	0	0	0	0	0	0	0	0	0	0	0		3	2007	0	0	0	0	0	0
	2010	Int_NoCare	0	0	0	0	0.474705	0.0987032	0	0	0	0.0278885	0.3	0.0987032	0	0	0	0	0	1		4	2008	0	0	0	0	0	0	0	0	0	0	0	0	0	0	0	0	0		4	2008	0	0	0	0	0	0
	2010	Int_InCare	0	0	0	0	0	0.273881	0.128456	0	0.182495	0.0261679	0	0.3	0.089	0	0	0	0	1		5	2009	0	0	0	0	0	0	0	0	0	0	0	0	0	0	0	0	0		5	2009	0	0	0	0	0	0
	2010	Int_ART1	0	0	0	0	0	0	0.971895	0.00866226	0.0143855	0.00505717	0	0	0	0	0	0	0	1		6	2010	1	0	0	0	0	0	0	0	0	0	0	0	0	0	0	0	0		6	2010	8588.04	0	0	0	0	0
	2010	Int_ART2	0	0	0	0	0	0	0	0.980557	0.0143855	0.00505717	0	0	0	0	0	0	0	1		7	2011	0.63376	0.0740274	0	0.018185	0.2	0.0740274	0	0	0	0	0	0	0	0	0	0	0		7	2011	5442.76	635.751	0	156.174	1717.61	635.751
	2010	Int_LTFU	0	0	0	0	0	0	0.1414	0.1515	0.438828	0.0278885	0	0	0	0	0	0.240383	0	1		8	2012	0.401652	0.0793501	0.0227113	0.0127881	0.221693	0.101736	0.0123223	0	0.0135096	0.00751485	0.06	0.0419489	0.00658844	0	0	0	0		8	2012	3449.4	681.462	195.045	109.825	1903.91	873.717
	2010	Int_Dead	0	0	0	0	0	0	0	0	0	0	0	0	0	0	0	0	0	0		9	2013	0.254551	0.0644999	0.0391183	0.00907102	0.185569	0.0953488	0.0332252	0.00242634	0.0286685	0.00928401	0.0706514	0.0856971	0.0303098	0.00540575	0	0.0059232	0.0417629		9	2013	2186.09	553.927	335.949	77.9023	1593.68	818.859
	2010	AIDS_NoCare	0	0	0	0	0	0	0	0	0	0	0.0690575	0.46884	0.0515874	0	0	0	0.410515	1		10	2014	0.161324	0.0471038	0.0452353	0.00644095	0.139001	0.0761742	0.0567596	0.00758936	0.0371595	0.00865015	0.0605497	0.0905944	0.0504859	0.0299116	0.00154134	0.0138096	0.0690636		10	2014	1385.46	404.529	388.482	55.3152	1193.74	654.187
	2010	AIDS_InCare	0	0	0	0	0	0	0	0	0	0	0	0.1231	0.432907	0	0	0.0588055	0.385187	1		11	2015	0.102241	0.0325806	0.0438774	0.00456003	0.0982492	0.0559456	0.0786838	0.0143138	0.0386796	0.0072316	0.0458816	0.0761124	0.0520511	0.0693263	0.00547691	0.0182295	0.0737991		11	2015	878.048	279.803	376.821	39.1617	843.768	480.463
	2010	AIDS_ART1ear	0	0	0	0	0	0	0	0	0	0	0	0	0	0.82049	0	0.0317053	0.147805	1		12	2016	0.0647962	0.0218435	0.0385385	0.00321309	0.0670876	0.0391047	0.0969087	0.0213583	0.0357341	0.00575303	0.0326432	0.0573618	0.0441622	0.107379	0.0111663	0.0189677	0.065631		12	2016	556.472	187.593	330.97	27.5942	576.151	335.833
	2010	AIDS_ART1late	0	0	0	0	0	0	0	0	0	0	0	0	0	0.932853	0.0305939	0.0107977	0.0257552	1		13	2017	0.0410652	0.0143673	0.0317714	0.00225186	0.044806	0.0264972	0.110873	0.0279181	0.0307829	0.00448893	0.0223805	0.0407189	0.0340197	0.136403	0.0174991	0.0175811	0.0536271		13	2017	352.67	123.387	272.854	19.3391	384.796	227.559
	2010	AIDS_ART2	0	0	0	0	0	0	0	0	0	0	0	0	0	0	0.878342	0.0274461	0.0942122	1		14	2018	0.0260255	0.00933484	0.0250756	0.00156969	0.0294827	0.017593	0.120853	0.0336211	0.0254513	0.00350333	0.0149874	0.027877	0.0248692	0.155157	0.0236274	0.0153767	0.0422792		14	2018	223.508	80.168	215.35	13.4805	253.199	151.089
	2010	AIDS_LTFU	0	0	0	0	0	0	0	0	0	0	0	0	0.1818	0	0.1919	0.215785	0.410515	1		15	2019	0.0164939	0.00601658	0.0191759	0.00108856	0.0192007	0.011522	0.127476	0.0383843	0.0205884	0.0027736	0.0098798	0.0186463	0.0176685	0.165144	0.0290718	0.0131006	0.0331007		15	2019	141.65	51.6707	164.683	9.34856	164.896	98.9512
	2010	AIDS_DEAD	0	0	0	0	0	0	0	0	0	0	0	0	0	0	0	0	0	0		16	2020	0.0104532	0.00385712	0.0143201	0.000751319	0.0124134	0.00747514	0.131447	0.0422772	0.0165269	0.00224995	0.00644248	0.0122792	0.0123859	0.168552	0.0336306	0.0110876	0.0262198		16	2020	89.7724	33.1251	122.981	6.45236	106.607	64.1968
																						17	2021	0.00662481	0.00246379	0.0104988	0.000516317	0.00798336	0.00481779	0.133411	0.0454315	0.0133121	0.00188127	0.00416893	0.00799985	0.00866505	0.167396	0.0372715	0.0094392	0.0212663		17	2021	56.8942	21.1591	90.1638	4.43415	68.5614	41.3754
																						18	2022	0.00419854	0.00156991	0.00758548	0.000353433	0.0051147	0.00309066	0.133903	0.0479896	0.0108556	0.00162441	0.0026829	0.00517267	0.00610909	0.163266	0.0400511	0.0081451	0.0177713		18	2022	36.0573	13.4824	65.1444	3.0353	43.9253	26.5427
																						19	2023	0.00266087	0.000998648	0.00541611	0.000241081	0.00326768	0.0019761	0.133347	0.0500803	0.00902294	0.00144613	0.00171969	0.00332664	0.00438033	0.157315	0.0420656	0.00715125	0.0153187		19	2023	22.8516	8.57643	46.5138	2.07041	28.063	16.9708
	TRANSITION PROBABILITY MATRIX																					PROPORTION OF 2011 POPULATION IN EACH STATE																				Number of individuals in each state
	2011		Asympt_NoCare	Asympt_InCare	Asympt_LTFU	Asympt_Dead	Int_NoCare	Int_InCare	Int_ART1	Int_ART2	Int_LTFU	Int_Dead	AIDS_NoCare	AIDS_InCare	AIDS_ART1ear	AIDS_ART1late	AIDS_ART2	AIDS_LTFU	AIDS_DEAD	Total		Period	Year	Asympt_NoCare	Asympt_InCare	Asympt_LTFU	Asympt_Dead	Int_NoCare	Int_InCare	Int_ART1	Int_ART2	Int_LTFU	Int_Dead	AIDS_NoCare	AIDS_InCare	AIDS_ART1ear	AIDS_ART1late	AIDS_ART2	AIDS_LTFU	AIDS_DEAD		Period	Year	Asympt_NoCare	Asympt_InCare	Asympt_LTFU	Asympt_Dead	Int_NoCare	Int_InCare
	2011	Asympt_NoCare	0.63376	0.0740274	0	0.018185	0.2	0.0740274	0	0	0	0	0	0	0	0	0	0	0	1		0	2004	0	0	0	0	0	0	0	0	0	0	0	0	0	0	0	0	0		0	2004	0	0	0	0	0	0
	2011	Asympt_InCare	0	0.438142	0.306795	0.0170631	0	0.2	0.038	0	0	0	0	0	0	0	0	0	0	1		1	2005	0	0	0	0	0	0	0	0	0	0	0	0	0	0	0	0	0		1	2005	0	0	0	0	0	0
	2011	Asympt_LTFU	0	0	0.660615	0.018185	0	0	0.1212	0	0.2	0	0	0	0	0	0	0	0	1		2	2006	0	0	0	0	0	0	0	0	0	0	0	0	0	0	0	0	0		2	2006	0	0	0	0	0	0
	2011	Asympt_Dead	0	0	0	0	0	0	0	0	0	0	0	0	0	0	0	0	0	0		3	2007	0	0	0	0	0	0	0	0	0	0	0	0	0	0	0	0	0		3	2007	0	0	0	0	0	0
	2011	Int_NoCare	0	0	0	0	0.474705	0.0987032	0	0	0	0.0278885	0.3	0.0987032	0	0	0	0	0	1		4	2008	0	0	0	0	0	0	0	0	0	0	0	0	0	0	0	0	0		4	2008	0	0	0	0	0	0
	2011	Int_InCare	0	0	0	0	0	0.273881	0.128456	0	0.182495	0.0261679	0	0.3	0.089	0	0	0	0	1		5	2009	0	0	0	0	0	0	0	0	0	0	0	0	0	0	0	0	0		5	2009	0	0	0	0	0	0
	2011	Int_ART1	0	0	0	0	0	0	0.971895	0.00866226	0.0143855	0.00505717	0	0	0	0	0	0	0	1		6	2010	0	0	0	0	0	0	0	0	0	0	0	0	0	0	0	0	0		6	2010	0	0	0	0	0	0
	2011	Int_ART2	0	0	0	0	0	0	0	0.980557	0.0143855	0.00505717	0	0	0	0	0	0	0	1		7	2011	1	0	0	0	0	0	0	0	0	0	0	0	0	0	0	0	0		7	2011	8588.04	0	0	0	0	0
	2011	Int_LTFU	0	0	0	0	0	0	0.1414	0.1515	0.438828	0.0278885	0	0	0	0	0	0.240383	0	1		8	2012	0.63376	0.0740274	0	0.018185	0.2	0.0740274	0	0	0	0	0	0	0	0	0	0	0		8	2012	5442.76	635.751	0	156.174	1717.61	635.751
	2011	Int_Dead	0	0	0	0	0	0	0	0	0	0	0	0	0	0	0	0	0	0		9	2013	0.401652	0.0793501	0.0227113	0.0127881	0.221693	0.101736	0.0123223	0	0.0135096	0.00751485	0.06	0.0419489	0.00658844	0	0	0	0		9	2013	3449.4	681.462	195.045	109.825	1903.91	873.717
	2011	AIDS_NoCare	0	0	0	0	0	0	0	0	0	0	0.0690575	0.46884	0.0515874	0	0	0	0.410515	1		10	2014	0.254551	0.0644999	0.0391183	0.00907102	0.185569	0.0953488	0.0332252	0.00242634	0.0286685	0.00928401	0.0706514	0.0856971	0.0303098	0.00540575	0	0.0059232	0.0417629		10	2014	2186.09	553.927	335.949	77.9023	1593.68	818.859
	2011	AIDS_InCare	0	0	0	0	0	0	0	0	0	0	0	0.1231	0.432907	0	0	0.0588055	0.385187	1		11	2015	0.161324	0.0471038	0.0452353	0.00644095	0.139001	0.0761742	0.0567596	0.00758936	0.0371595	0.00865015	0.0605497	0.0905944	0.0504859	0.0299116	0.00154134	0.0138096	0.0690636		11	2015	1385.46	404.529	388.482	55.3152	1193.74	654.187
	2011	AIDS_ART1ear	0	0	0	0	0	0	0	0	0	0	0	0	0	0.82049	0	0.0317053	0.147805	1		12	2016	0.102241	0.0325806	0.0438774	0.00456003	0.0982492	0.0559456	0.0786838	0.0143138	0.0386796	0.0072316	0.0458816	0.0761124	0.0520511	0.0693263	0.00547691	0.0182295	0.0737991		12	2016	878.048	279.803	376.821	39.1617	843.768	480.463
	2011	AIDS_ART1late	0	0	0	0	0	0	0	0	0	0	0	0	0	0.932853	0.0305939	0.0107977	0.0257552	1		13	2017	0.0647962	0.0218435	0.0385385	0.00321309	0.0670876	0.0391047	0.0969087	0.0213583	0.0357341	0.00575303	0.0326432	0.0573618	0.0441622	0.107379	0.0111663	0.0189677	0.065631		13	2017	556.472	187.593	330.97	27.5942	576.151	335.833
	2011	AIDS_ART2	0	0	0	0	0	0	0	0	0	0	0	0	0	0	0.878342	0.0274461	0.0942122	1		14	2018	0.0410652	0.0143673	0.0317714	0.00225186	0.044806	0.0264972	0.110873	0.0279181	0.0307829	0.00448893	0.0223805	0.0407189	0.0340197	0.136403	0.0174991	0.0175811	0.0536271		14	2018	352.67	123.387	272.854	19.3391	384.796	227.559
	2011	AIDS_LTFU	0	0	0	0	0	0	0	0	0	0	0	0	0.1818	0	0.1919	0.215785	0.410515	1		15	2019	0.0260255	0.00933484	0.0250756	0.00156969	0.0294827	0.017593	0.120853	0.0336211	0.0254513	0.00350333	0.0149874	0.027877	0.0248692	0.155157	0.0236274	0.0153767	0.0422792		15	2019	223.508	80.168	215.35	13.4805	253.199	151.089
	2011	AIDS_DEAD	0	0	0	0	0	0	0	0	0	0	0	0	0	0	0	0	0	0		16	2020	0.0164939	0.00601658	0.0191759	0.00108856	0.0192007	0.011522	0.127476	0.0383843	0.0205884	0.0027736	0.0098798	0.0186463	0.0176685	0.165144	0.0290718	0.0131006	0.0331007		16	2020	141.65	51.6707	164.683	9.34856	164.896	98.9512
																						17	2021	0.0104532	0.00385712	0.0143201	0.000751319	0.0124134	0.00747514	0.131447	0.0422772	0.0165269	0.00224995	0.00644248	0.0122792	0.0123859	0.168552	0.0336306	0.0110876	0.0262198		17	2021	89.7724	33.1251	122.981	6.45236	106.607	64.1968
																						18	2022	0.00662481	0.00246379	0.0104988	0.000516317	0.00798336	0.00481779	0.133411	0.0454315	0.0133121	0.00188127	0.00416893	0.00799985	0.00866505	0.167396	0.0372715	0.0094392	0.0212663		18	2022	56.8942	21.1591	90.1638	4.43415	68.5614	41.3754
																						19	2023	0.00419854	0.00156991	0.00758548	0.000353433	0.0051147	0.00309066	0.133903	0.0479896	0.0108556	0.00162441	0.0026829	0.00517267	0.00610909	0.163266	0.0400511	0.0081451	0.0177713		19	2023	36.0573	13.4824	65.1444	3.0353	43.9253	26.5427
	TRANSITION PROBABILITY MATRIX																					PROPORTION OF 2012 POPULATION IN EACH STATE																				Number of individuals in each state
	2012		Asympt_NoCare	Asympt_InCare	Asympt_LTFU	Asympt_Dead	Int_NoCare	Int_InCare	Int_ART1	Int_ART2	Int_LTFU	Int_Dead	AIDS_NoCare	AIDS_InCare	AIDS_ART1ear	AIDS_ART1late	AIDS_ART2	AIDS_LTFU	AIDS_DEAD	Total		Period	Year	Asympt_NoCare	Asympt_InCare	Asympt_LTFU	Asympt_Dead	Int_NoCare	Int_InCare	Int_ART1	Int_ART2	Int_LTFU	Int_Dead	AIDS_NoCare	AIDS_InCare	AIDS_ART1ear	AIDS_ART1late	AIDS_ART2	AIDS_LTFU	AIDS_DEAD		Period	Year	Asympt_NoCare	Asympt_InCare	Asympt_LTFU	Asympt_Dead	Int_NoCare	Int_InCare
	2012	Asympt_NoCare	0.63376	0.0740274	0	0.018185	0.2	0.0740274	0	0	0	0	0	0	0	0	0	0	0	1		0	2004	0	0	0	0	0	0	0	0	0	0	0	0	0	0	0	0	0		0	2004	0	0	0	0	0	0
	2012	Asympt_InCare	0	0.438142	0.306795	0.0170631	0	0.2	0.038	0	0	0	0	0	0	0	0	0	0	1		1	2005	0	0	0	0	0	0	0	0	0	0	0	0	0	0	0	0	0		1	2005	0	0	0	0	0	0
	2012	Asympt_LTFU	0	0	0.660615	0.018185	0	0	0.1212	0	0.2	0	0	0	0	0	0	0	0	1		2	2006	0	0	0	0	0	0	0	0	0	0	0	0	0	0	0	0	0		2	2006	0	0	0	0	0	0
	2012	Asympt_Dead	0	0	0	0	0	0	0	0	0	0	0	0	0	0	0	0	0	0		3	2007	0	0	0	0	0	0	0	0	0	0	0	0	0	0	0	0	0		3	2007	0	0	0	0	0	0
	2012	Int_NoCare	0	0	0	0	0.474705	0.0987032	0	0	0	0.0278885	0.3	0.0987032	0	0	0	0	0	1		4	2008	0	0	0	0	0	0	0	0	0	0	0	0	0	0	0	0	0		4	2008	0	0	0	0	0	0
	2012	Int_InCare	0	0	0	0	0	0.273881	0.128456	0	0.182495	0.0261679	0	0.3	0.089	0	0	0	0	1		5	2009	0	0	0	0	0	0	0	0	0	0	0	0	0	0	0	0	0		5	2009	0	0	0	0	0	0
	2012	Int_ART1	0	0	0	0	0	0	0.971895	0.00866226	0.0143855	0.00505717	0	0	0	0	0	0	0	1		6	2010	0	0	0	0	0	0	0	0	0	0	0	0	0	0	0	0	0		6	2010	0	0	0	0	0	0
	2012	Int_ART2	0	0	0	0	0	0	0	0.980557	0.0143855	0.00505717	0	0	0	0	0	0	0	1		7	2011	0	0	0	0	0	0	0	0	0	0	0	0	0	0	0	0	0		7	2011	0	0	0	0	0	0
	2012	Int_LTFU	0	0	0	0	0	0	0.1414	0.1515	0.438828	0.0278885	0	0	0	0	0	0.240383	0	1		8	2012	1	0	0	0	0	0	0	0	0	0	0	0	0	0	0	0	0		8	2012	8588.04	0	0	0	0	0
	2012	Int_Dead	0	0	0	0	0	0	0	0	0	0	0	0	0	0	0	0	0	0		9	2013	0.63376	0.0740274	0	0.018185	0.2	0.0740274	0	0	0	0	0	0	0	0	0	0	0		9	2013	5442.76	635.751	0	156.174	1717.61	635.751
	2012	AIDS_NoCare	0	0	0	0	0	0	0	0	0	0	0.0690575	0.46884	0.0515874	0	0	0	0.410515	1		10	2014	0.401652	0.0793501	0.0227113	0.0127881	0.221693	0.101736	0.0123223	0	0.0135096	0.00751485	0.06	0.0419489	0.00658844	0	0	0	0		10	2014	3449.4	681.462	195.045	109.825	1903.91	873.717
	2012	AIDS_InCare	0	0	0	0	0	0	0	0	0	0	0	0.1231	0.432907	0	0	0.0588055	0.385187	1		11	2015	0.254551	0.0644999	0.0391183	0.00907102	0.185569	0.0953488	0.0332252	0.00242634	0.0286685	0.00928401	0.0706514	0.0856971	0.0303098	0.00540575	0	0.0059232	0.0417629		11	2015	2186.09	553.927	335.949	77.9023	1593.68	818.859
	2012	AIDS_ART1ear	0	0	0	0	0	0	0	0	0	0	0	0	0	0.82049	0	0.0317053	0.147805	1		12	2016	0.161324	0.0471038	0.0452353	0.00644095	0.139001	0.0761742	0.0567596	0.00758936	0.0371595	0.00865015	0.0605497	0.0905944	0.0504859	0.0299116	0.00154134	0.0138096	0.0690636		12	2016	1385.46	404.529	388.482	55.3152	1193.74	654.187
	2012	AIDS_ART1late	0	0	0	0	0	0	0	0	0	0	0	0	0	0.932853	0.0305939	0.0107977	0.0257552	1		13	2017	0.102241	0.0325806	0.0438774	0.00456003	0.0982492	0.0559456	0.0786838	0.0143138	0.0386796	0.0072316	0.0458816	0.0761124	0.0520511	0.0693263	0.00547691	0.0182295	0.0737991		13	2017	878.048	279.803	376.821	39.1617	843.768	480.463
	2012	AIDS_ART2	0	0	0	0	0	0	0	0	0	0	0	0	0	0	0.878342	0.0274461	0.0942122	1		14	2018	0.0647962	0.0218435	0.0385385	0.00321309	0.0670876	0.0391047	0.0969087	0.0213583	0.0357341	0.00575303	0.0326432	0.0573618	0.0441622	0.107379	0.0111663	0.0189677	0.065631		14	2018	556.472	187.593	330.97	27.5942	576.151	335.833
	2012	AIDS_LTFU	0	0	0	0	0	0	0	0	0	0	0	0	0.1818	0	0.1919	0.215785	0.410515	1		15	2019	0.0410652	0.0143673	0.0317714	0.00225186	0.044806	0.0264972	0.110873	0.0279181	0.0307829	0.00448893	0.0223805	0.0407189	0.0340197	0.136403	0.0174991	0.0175811	0.0536271		15	2019	352.67	123.387	272.854	19.3391	384.796	227.559
	2012	AIDS_DEAD	0	0	0	0	0	0	0	0	0	0	0	0	0	0	0	0	0	0		16	2020	0.0260255	0.00933484	0.0250756	0.00156969	0.0294827	0.017593	0.120853	0.0336211	0.0254513	0.00350333	0.0149874	0.027877	0.0248692	0.155157	0.0236274	0.0153767	0.0422792		16	2020	223.508	80.168	215.35	13.4805	253.199	151.089
																						17	2021	0.0164939	0.00601658	0.0191759	0.00108856	0.0192007	0.011522	0.127476	0.0383843	0.0205884	0.0027736	0.0098798	0.0186463	0.0176685	0.165144	0.0290718	0.0131006	0.0331007		17	2021	141.65	51.6707	164.683	9.34856	164.896	98.9512
																						18	2022	0.0104532	0.00385712	0.0143201	0.000751319	0.0124134	0.00747514	0.131447	0.0422772	0.0165269	0.00224995	0.00644248	0.0122792	0.0123859	0.168552	0.0336306	0.0110876	0.0262198		18	2022	89.7724	33.1251	122.981	6.45236	106.607	64.1968
																						19	2023	0.00662481	0.00246379	0.0104988	0.000516317	0.00798336	0.00481779	0.133411	0.0454315	0.0133121	0.00188127	0.00416893	0.00799985	0.00866505	0.167396	0.0372715	0.0094392	0.0212663		19	2023	56.8942	21.1591	90.1638	4.43415	68.5614	41.3754
	TRANSITION PROBABILITY MATRIX																					PROPORTION OF 2013 POPULATION IN EACH STATE																				Number of individuals in each state
	2013		Asympt_NoCare	Asympt_InCare	Asympt_LTFU	Asympt_Dead	Int_NoCare	Int_InCare	Int_ART1	Int_ART2	Int_LTFU	Int_Dead	AIDS_NoCare	AIDS_InCare	AIDS_ART1ear	AIDS_ART1late	AIDS_ART2	AIDS_LTFU	AIDS_DEAD	Total		Period	Year	Asympt_NoCare	Asympt_InCare	Asympt_LTFU	Asympt_Dead	Int_NoCare	Int_InCare	Int_ART1	Int_ART2	Int_LTFU	Int_Dead	AIDS_NoCare	AIDS_InCare	AIDS_ART1ear	AIDS_ART1late	AIDS_ART2	AIDS_LTFU	AIDS_DEAD		Period	Year	Asympt_NoCare	Asympt_InCare	Asympt_LTFU	Asympt_Dead	Int_NoCare	Int_InCare
	2013	Asympt_NoCare	0.63376	0.0740274	0	0.018185	0.2	0.0740274	0	0	0	0	0	0	0	0	0	0	0	1		0	2004	0	0	0	0	0	0	0	0	0	0	0	0	0	0	0	0	0		0	2004	0	0	0	0	0	0
	2013	Asympt_InCare	0	0.438142	0.306795	0.0170631	0	0.2	0.038	0	0	0	0	0	0	0	0	0	0	1		1	2005	0	0	0	0	0	0	0	0	0	0	0	0	0	0	0	0	0		1	2005	0	0	0	0	0	0
	2013	Asympt_LTFU	0	0	0.650515	0.018185	0	0	0.1313	0	0.2	0	0	0	0	0	0	0	0	1		2	2006	0	0	0	0	0	0	0	0	0	0	0	0	0	0	0	0	0		2	2006	0	0	0	0	0	0
	2013	Asympt_Dead	0	0	0	0	0	0	0	0	0	0	0	0	0	0	0	0	0	0		3	2007	0	0	0	0	0	0	0	0	0	0	0	0	0	0	0	0	0		3	2007	0	0	0	0	0	0
	2013	Int_NoCare	0	0	0	0	0.474705	0.0987032	0	0	0	0.0278885	0.3	0.0987032	0	0	0	0	0	1		4	2008	0	0	0	0	0	0	0	0	0	0	0	0	0	0	0	0	0		4	2008	0	0	0	0	0	0
	2013	Int_InCare	0	0	0	0	0	0.273881	0.128456	0	0.182495	0.0261679	0	0.3	0.089	0	0	0	0	1		5	2009	0	0	0	0	0	0	0	0	0	0	0	0	0	0	0	0	0		5	2009	0	0	0	0	0	0
	2013	Int_ART1	0	0	0	0	0	0	0.971895	0.00866226	0.0143855	0.00505717	0	0	0	0	0	0	0	1		6	2010	0	0	0	0	0	0	0	0	0	0	0	0	0	0	0	0	0		6	2010	0	0	0	0	0	0
	2013	Int_ART2	0	0	0	0	0	0	0	0.980557	0.0143855	0.00505717	0	0	0	0	0	0	0	1		7	2011	0	0	0	0	0	0	0	0	0	0	0	0	0	0	0	0	0		7	2011	0	0	0	0	0	0
	2013	Int_LTFU	0	0	0	0	0	0	0.1616	0.1717	0.398428	0.0278885	0	0	0	0	0	0.240383	0	1		8	2012	0	0	0	0	0	0	0	0	0	0	0	0	0	0	0	0	0		8	2012	0	0	0	0	0	0
	2013	Int_Dead	0	0	0	0	0	0	0	0	0	0	0	0	0	0	0	0	0	0		9	2013	1	0	0	0	0	0	0	0	0	0	0	0	0	0	0	0	0		9	2013	8588.04	0	0	0	0	0
	2013	AIDS_NoCare	0	0	0	0	0	0	0	0	0	0	0.0690575	0.46884	0.0515874	0	0	0	0.410515	1		10	2014	0.63376	0.0740274	0	0.018185	0.2	0.0740274	0	0	0	0	0	0	0	0	0	0	0		10	2014	5442.76	635.751	0	156.174	1717.61	635.751
	2013	AIDS_InCare	0	0	0	0	0	0	0	0	0	0	0	0.1231	0.432907	0	0	0.0588055	0.385187	1		11	2015	0.401652	0.0793501	0.0227113	0.0127881	0.221693	0.101736	0.0123223	0	0.0135096	0.00751485	0.06	0.0419489	0.00658844	0	0	0	0		11	2015	3449.4	681.462	195.045	109.825	1903.91	873.717
	2013	AIDS_ART1ear	0	0	0	0	0	0	0	0	0	0	0	0	0	0.82049	0	0.0317053	0.147805	1		12	2016	0.254551	0.0644999	0.0391183	0.00907102	0.185569	0.0953488	0.0332252	0.00242634	0.0286685	0.00928401	0.0706514	0.0856971	0.0303098	0.00540575	0	0.0059232	0.0417629		12	2016	2186.09	553.927	335.949	77.9023	1593.68	818.859
	2013	AIDS_ART1late	0	0	0	0	0	0	0	0	0	0	0	0	0	0.932853	0.0305939	0.0107977	0.0257552	1		13	2017	0.161324	0.0471038	0.0452353	0.00644095	0.139001	0.0761742	0.0567596	0.00758936	0.0371595	0.00865015	0.0605497	0.0905944	0.0504859	0.0299116	0.00154134	0.0138096	0.0690636		13	2017	1385.46	404.529	388.482	55.3152	1193.74	654.187
	2013	AIDS_ART2	0	0	0	0	0	0	0	0	0	0	0	0	0	0	0.878342	0.0274461	0.0942122	1		14	2018	0.102241	0.0325806	0.0438774	0.00456003	0.0982492	0.0559456	0.0786838	0.0143138	0.0386796	0.0072316	0.0458816	0.0761124	0.0520511	0.0693263	0.00547691	0.0182295	0.0737991		14	2018	878.048	279.803	376.821	39.1617	843.768	480.463
	2013	AIDS_LTFU	0	0	0	0	0	0	0	0	0	0	0	0	0.2121	0	0.2323	0.145085	0.410515	1		15	2019	0.0647962	0.0218435	0.0385385	0.00321309	0.0670876	0.0391047	0.0969087	0.0213583	0.0357341	0.00575303	0.0326432	0.0573618	0.0441622	0.107379	0.0111663	0.0189677	0.065631		15	2019	556.472	187.593	330.97	27.5942	576.151	335.833
	2013	AIDS_DEAD	0	0	0	0	0	0	0	0	0	0	0	0	0	0	0	0	0	0		16	2020	0.0410652	0.0143673	0.0317714	0.00225186	0.044806	0.0264972	0.110873	0.0279181	0.0307829	0.00448893	0.0223805	0.0407189	0.0340197	0.136403	0.0174991	0.0175811	0.0536271		16	2020	352.67	123.387	272.854	19.3391	384.796	227.559
																						17	2021	0.0260255	0.00933484	0.0250756	0.00156969	0.0294827	0.017593	0.120853	0.0336211	0.0254513	0.00350333	0.0149874	0.027877	0.0248692	0.155157	0.0236274	0.0153767	0.0422792		17	2021	223.508	80.168	215.35	13.4805	253.199	151.089
																						18	2022	0.0164939	0.00601658	0.0191759	0.00108856	0.0192007	0.011522	0.127476	0.0383843	0.0205884	0.0027736	0.0098798	0.0186463	0.0176685	0.165144	0.0290718	0.0131006	0.0331007		18	2022	141.65	51.6707	164.683	9.34856	164.896	98.9512
																						19	2023	0.0104532	0.00385712	0.0143201	0.000751319	0.0124134	0.00747514	0.131447	0.0422772	0.0165269	0.00224995	0.00644248	0.0122792	0.0123859	0.168552	0.0336306	0.0110876	0.0262198		19	2023	89.7724	33.1251	122.981	6.45236	106.607	64.1968
																						PROPORTION OF 2014 POPULATION IN EACH STATE																				Number of individuals in each state
																						Period	Year	Asympt_NoCare	Asympt_InCare	Asympt_LTFU	Asympt_Dead	Int_NoCare	Int_InCare	Int_ART1	Int_ART2	Int_LTFU	Int_Dead	AIDS_NoCare	AIDS_InCare	AIDS_ART1ear	AIDS_ART1late	AIDS_ART2	AIDS_LTFU	AIDS_DEAD		Period	Year	Asympt_NoCare	Asympt_InCare	Asympt_LTFU	Asympt_Dead	Int_NoCare	Int_InCare
																						0	2004	0	0	0	0	0	0	0	0	0	0	0	0	0	0	0	0	0		0	2004	0	0	0	0	0	0
																						1	2005	0	0	0	0	0	0	0	0	0	0	0	0	0	0	0	0	0		1	2005	0	0	0	0	0	0
																						2	2006	0	0	0	0	0	0	0	0	0	0	0	0	0	0	0	0	0		2	2006	0	0	0	0	0	0
																						3	2007	0	0	0	0	0	0	0	0	0	0	0	0	0	0	0	0	0		3	2007	0	0	0	0	0	0
																						4	2008	0	0	0	0	0	0	0	0	0	0	0	0	0	0	0	0	0		4	2008	0	0	0	0	0	0
																						5	2009	0	0	0	0	0	0	0	0	0	0	0	0	0	0	0	0	0		5	2009	0	0	0	0	0	0
																						6	2010	0	0	0	0	0	0	0	0	0	0	0	0	0	0	0	0	0		6	2010	0	0	0	0	0	0
																						7	2011	0	0	0	0	0	0	0	0	0	0	0	0	0	0	0	0	0		7	2011	0	0	0	0	0	0
																						8	2012	0	0	0	0	0	0	0	0	0	0	0	0	0	0	0	0	0		8	2012	0	0	0	0	0	0
																						9	2013	0	0	0	0	0	0	0	0	0	0	0	0	0	0	0	0	0		9	2013	0	0	0	0	0	0
																						10	2014	1	0	0	0	0	0	0	0	0	0	0	0	0	0	0	0	0		10	2014	8588.04	0	0	0	0	0
																						11	2015	0.63376	0.0740274	0	0.018185	0.2	0.0740274	0	0	0	0	0	0	0	0	0	0	0		11	2015	5442.76	635.751	0	156.174	1717.61	635.751
																						12	2016	0.401652	0.0793501	0.0227113	0.0127881	0.221693	0.101736	0.0123223	0	0.0135096	0.00751485	0.06	0.0419489	0.00658844	0	0	0	0		12	2016	3449.4	681.462	195.045	109.825	1903.91	873.717
																						13	2017	0.254551	0.0644999	0.0391183	0.00907102	0.185569	0.0953488	0.0332252	0.00242634	0.0286685	0.00928401	0.0706514	0.0856971	0.0303098	0.00540575	0	0.0059232	0.0417629		13	2017	2186.09	553.927	335.949	77.9023	1593.68	818.859
																						14	2018	0.161324	0.0471038	0.0452353	0.00644095	0.139001	0.0761742	0.0567596	0.00758936	0.0371595	0.00865015	0.0605497	0.0905944	0.0504859	0.0299116	0.00154134	0.0138096	0.0690636		14	2018	1385.46	404.529	388.482	55.3152	1193.74	654.187
																						15	2019	0.102241	0.0325806	0.0438774	0.00456003	0.0982492	0.0559456	0.0786838	0.0143138	0.0386796	0.0072316	0.0458816	0.0761124	0.0520511	0.0693263	0.00547691	0.0182295	0.0737991		15	2019	878.048	279.803	376.821	39.1617	843.768	480.463
																						16	2020	0.0647962	0.0218435	0.0385385	0.00321309	0.0670876	0.0391047	0.0969087	0.0213583	0.0357341	0.00575303	0.0326432	0.0573618	0.0441622	0.107379	0.0111663	0.0189677	0.065631		16	2020	556.472	187.593	330.97	27.5942	576.151	335.833
																						17	2021	0.0410652	0.0143673	0.0317714	0.00225186	0.044806	0.0264972	0.110873	0.0279181	0.0307829	0.00448893	0.0223805	0.0407189	0.0340197	0.136403	0.0174991	0.0175811	0.0536271		17	2021	352.67	123.387	272.854	19.3391	384.796	227.559
																						18	2022	0.0260255	0.00933484	0.0250756	0.00156969	0.0294827	0.017593	0.120853	0.0336211	0.0254513	0.00350333	0.0149874	0.027877	0.0248692	0.155157	0.0236274	0.0153767	0.0422792		18	2022	223.508	80.168	215.35	13.4805	253.199	151.089
																						19	2023	0.0164939	0.00601658	0.0191759	0.00108856	0.0192007	0.011522	0.127476	0.0383843	0.0205884	0.0027736	0.0098798	0.0186463	0.0176685	0.165144	0.0290718	0.0131006	0.0331007		19	2023	141.65	51.6707	164.683	9.34856	164.896	98.9512
																						PROPORTION OF 2015 POPULATION IN EACH STATE																				Number of individuals in each state
																						Period	Year	Asympt_NoCare	Asympt_InCare	Asympt_LTFU	Asympt_Dead	Int_NoCare	Int_InCare	Int_ART1	Int_ART2	Int_LTFU	Int_Dead	AIDS_NoCare	AIDS_InCare	AIDS_ART1ear	AIDS_ART1late	AIDS_ART2	AIDS_LTFU	AIDS_DEAD		Period	Year	Asympt_NoCare	Asympt_InCare	Asympt_LTFU	Asympt_Dead	Int_NoCare	Int_InCare
																						0	2004	0	0	0	0	0	0	0	0	0	0	0	0	0	0	0	0	0		0	2004	0	0	0	0	0	0
																						1	2005	0	0	0	0	0	0	0	0	0	0	0	0	0	0	0	0	0		1	2005	0	0	0	0	0	0
																						2	2006	0	0	0	0	0	0	0	0	0	0	0	0	0	0	0	0	0		2	2006	0	0	0	0	0	0
																						3	2007	0	0	0	0	0	0	0	0	0	0	0	0	0	0	0	0	0		3	2007	0	0	0	0	0	0
																						4	2008	0	0	0	0	0	0	0	0	0	0	0	0	0	0	0	0	0		4	2008	0	0	0	0	0	0
																						5	2009	0	0	0	0	0	0	0	0	0	0	0	0	0	0	0	0	0		5	2009	0	0	0	0	0	0
																						6	2010	0	0	0	0	0	0	0	0	0	0	0	0	0	0	0	0	0		6	2010	0	0	0	0	0	0
																						7	2011	0	0	0	0	0	0	0	0	0	0	0	0	0	0	0	0	0		7	2011	0	0	0	0	0	0
																						8	2012	0	0	0	0	0	0	0	0	0	0	0	0	0	0	0	0	0		8	2012	0	0	0	0	0	0
																						9	2013	0	0	0	0	0	0	0	0	0	0	0	0	0	0	0	0	0		9	2013	0	0	0	0	0	0
																						10	2014	0	0	0	0	0	0	0	0	0	0	0	0	0	0	0	0	0		10	2014	0	0	0	0	0	0
																						11	2015	1	0	0	0	0	0	0	0	0	0	0	0	0	0	0	0	0		11	2015	8588.04	0	0	0	0	0
																						12	2016	0.63376	0.0740274	0	0.018185	0.2	0.0740274	0	0	0	0	0	0	0	0	0	0	0		12	2016	5442.76	635.751	0	156.174	1717.61	635.751
																						13	2017	0.401652	0.0793501	0.0227113	0.0127881	0.221693	0.101736	0.0123223	0	0.0135096	0.00751485	0.06	0.0419489	0.00658844	0	0	0	0		13	2017	3449.4	681.462	195.045	109.825	1903.91	873.717
																						14	2018	0.254551	0.0644999	0.0391183	0.00907102	0.185569	0.0953488	0.0332252	0.00242634	0.0286685	0.00928401	0.0706514	0.0856971	0.0303098	0.00540575	0	0.0059232	0.0417629		14	2018	2186.09	553.927	335.949	77.9023	1593.68	818.859
																						15	2019	0.161324	0.0471038	0.0452353	0.00644095	0.139001	0.0761742	0.0567596	0.00758936	0.0371595	0.00865015	0.0605497	0.0905944	0.0504859	0.0299116	0.00154134	0.0138096	0.0690636		15	2019	1385.46	404.529	388.482	55.3152	1193.74	654.187
																						16	2020	0.102241	0.0325806	0.0438774	0.00456003	0.0982492	0.0559456	0.0786838	0.0143138	0.0386796	0.0072316	0.0458816	0.0761124	0.0520511	0.0693263	0.00547691	0.0182295	0.0737991		16	2020	878.048	279.803	376.821	39.1617	843.768	480.463
																						17	2021	0.0647962	0.0218435	0.0385385	0.00321309	0.0670876	0.0391047	0.0969087	0.0213583	0.0357341	0.00575303	0.0326432	0.0573618	0.0441622	0.107379	0.0111663	0.0189677	0.065631		17	2021	556.472	187.593	330.97	27.5942	576.151	335.833
																						18	2022	0.0410652	0.0143673	0.0317714	0.00225186	0.044806	0.0264972	0.110873	0.0279181	0.0307829	0.00448893	0.0223805	0.0407189	0.0340197	0.136403	0.0174991	0.0175811	0.0536271		18	2022	352.67	123.387	272.854	19.3391	384.796	227.559
																						19	2023	0.0260255	0.00933484	0.0250756	0.00156969	0.0294827	0.017593	0.120853	0.0336211	0.0254513	0.00350333	0.0149874	0.027877	0.0248692	0.155157	0.0236274	0.0153767	0.0422792		19	2023	223.508	80.168	215.35	13.4805	253.199	151.089
																						PROPORTION OF 2016 POPULATION IN EACH STATE																				Number of individuals in each state
																						Period	Year	Asympt_NoCare	Asympt_InCare	Asympt_LTFU	Asympt_Dead	Int_NoCare	Int_InCare	Int_ART1	Int_ART2	Int_LTFU	Int_Dead	AIDS_NoCare	AIDS_InCare	AIDS_ART1ear	AIDS_ART1late	AIDS_ART2	AIDS_LTFU	AIDS_DEAD		Period	Year	Asympt_NoCare	Asympt_InCare	Asympt_LTFU	Asympt_Dead	Int_NoCare	Int_InCare
																						0	2004	0	0	0	0	0	0	0	0	0	0	0	0	0	0	0	0	0		0	2004	0	0	0	0	0	0
																						1	2005	0	0	0	0	0	0	0	0	0	0	0	0	0	0	0	0	0		1	2005	0	0	0	0	0	0
																						2	2006	0	0	0	0	0	0	0	0	0	0	0	0	0	0	0	0	0		2	2006	0	0	0	0	0	0
																						3	2007	0	0	0	0	0	0	0	0	0	0	0	0	0	0	0	0	0		3	2007	0	0	0	0	0	0
																						4	2008	0	0	0	0	0	0	0	0	0	0	0	0	0	0	0	0	0		4	2008	0	0	0	0	0	0
																						5	2009	0	0	0	0	0	0	0	0	0	0	0	0	0	0	0	0	0		5	2009	0	0	0	0	0	0
																						6	2010	0	0	0	0	0	0	0	0	0	0	0	0	0	0	0	0	0		6	2010	0	0	0	0	0	0
																						7	2011	0	0	0	0	0	0	0	0	0	0	0	0	0	0	0	0	0		7	2011	0	0	0	0	0	0
																						8	2012	0	0	0	0	0	0	0	0	0	0	0	0	0	0	0	0	0		8	2012	0	0	0	0	0	0
																						9	2013	0	0	0	0	0	0	0	0	0	0	0	0	0	0	0	0	0		9	2013	0	0	0	0	0	0
																						10	2014	0	0	0	0	0	0	0	0	0	0	0	0	0	0	0	0	0		10	2014	0	0	0	0	0	0
																						11	2015	0	0	0	0	0	0	0	0	0	0	0	0	0	0	0	0	0		11	2015	0	0	0	0	0	0
																						12	2016	1	0	0	0	0	0	0	0	0	0	0	0	0	0	0	0	0		12	2016	8588.04	0	0	0	0	0
																						13	2017	0.63376	0.0740274	0	0.018185	0.2	0.0740274	0	0	0	0	0	0	0	0	0	0	0		13	2017	5442.76	635.751	0	156.174	1717.61	635.751
																						14	2018	0.401652	0.0793501	0.0227113	0.0127881	0.221693	0.101736	0.0123223	0	0.0135096	0.00751485	0.06	0.0419489	0.00658844	0	0	0	0		14	2018	3449.4	681.462	195.045	109.825	1903.91	873.717
																						15	2019	0.254551	0.0644999	0.0391183	0.00907102	0.185569	0.0953488	0.0332252	0.00242634	0.0286685	0.00928401	0.0706514	0.0856971	0.0303098	0.00540575	0	0.0059232	0.0417629		15	2019	2186.09	553.927	335.949	77.9023	1593.68	818.859
																						16	2020	0.161324	0.0471038	0.0452353	0.00644095	0.139001	0.0761742	0.0567596	0.00758936	0.0371595	0.00865015	0.0605497	0.0905944	0.0504859	0.0299116	0.00154134	0.0138096	0.0690636		16	2020	1385.46	404.529	388.482	55.3152	1193.74	654.187
																						17	2021	0.102241	0.0325806	0.0438774	0.00456003	0.0982492	0.0559456	0.0786838	0.0143138	0.0386796	0.0072316	0.0458816	0.0761124	0.0520511	0.0693263	0.00547691	0.0182295	0.0737991		17	2021	878.048	279.803	376.821	39.1617	843.768	480.463
																						18	2022	0.0647962	0.0218435	0.0385385	0.00321309	0.0670876	0.0391047	0.0969087	0.0213583	0.0357341	0.00575303	0.0326432	0.0573618	0.0441622	0.107379	0.0111663	0.0189677	0.065631		18	2022	556.472	187.593	330.97	27.5942	576.151	335.833
																						19	2023	0.0410652	0.0143673	0.0317714	0.00225186	0.044806	0.0264972	0.110873	0.0279181	0.0307829	0.00448893	0.0223805	0.0407189	0.0340197	0.136403	0.0174991	0.0175811	0.0536271		19	2023	352.67	123.387	272.854	19.3391	384.796	227.559
																						PROPORTION OF 2017 POPULATION IN EACH STATE																				Number of individuals in each state
																						Period	Year	Asympt_NoCare	Asympt_InCare	Asympt_LTFU	Asympt_Dead	Int_NoCare	Int_InCare	Int_ART1	Int_ART2	Int_LTFU	Int_Dead	AIDS_NoCare	AIDS_InCare	AIDS_ART1ear	AIDS_ART1late	AIDS_ART2	AIDS_LTFU	AIDS_DEAD		Period	Year	Asympt_NoCare	Asympt_InCare	Asympt_LTFU	Asympt_Dead	Int_NoCare	Int_InCare
																						0	2004	0	0	0	0	0	0	0	0	0	0	0	0	0	0	0	0	0		0	2004	0	0	0	0	0	0
																						1	2005	0	0	0	0	0	0	0	0	0	0	0	0	0	0	0	0	0		1	2005	0	0	0	0	0	0
																						2	2006	0	0	0	0	0	0	0	0	0	0	0	0	0	0	0	0	0		2	2006	0	0	0	0	0	0
																						3	2007	0	0	0	0	0	0	0	0	0	0	0	0	0	0	0	0	0		3	2007	0	0	0	0	0	0
																						4	2008	0	0	0	0	0	0	0	0	0	0	0	0	0	0	0	0	0		4	2008	0	0	0	0	0	0
																						5	2009	0	0	0	0	0	0	0	0	0	0	0	0	0	0	0	0	0		5	2009	0	0	0	0	0	0
																						6	2010	0	0	0	0	0	0	0	0	0	0	0	0	0	0	0	0	0		6	2010	0	0	0	0	0	0
																						7	2011	0	0	0	0	0	0	0	0	0	0	0	0	0	0	0	0	0		7	2011	0	0	0	0	0	0
																						8	2012	0	0	0	0	0	0	0	0	0	0	0	0	0	0	0	0	0		8	2012	0	0	0	0	0	0
																						9	2013	0	0	0	0	0	0	0	0	0	0	0	0	0	0	0	0	0		9	2013	0	0	0	0	0	0
																						10	2014	0	0	0	0	0	0	0	0	0	0	0	0	0	0	0	0	0		10	2014	0	0	0	0	0	0
																						11	2015	0	0	0	0	0	0	0	0	0	0	0	0	0	0	0	0	0		11	2015	0	0	0	0	0	0
																						12	2016	0	0	0	0	0	0	0	0	0	0	0	0	0	0	0	0	0		12	2016	0	0	0	0	0	0
																						13	2017	1	0	0	0	0	0	0	0	0	0	0	0	0	0	0	0	0		13	2017	8588.04	0	0	0	0	0
																						14	2018	0.63376	0.0740274	0	0.018185	0.2	0.0740274	0	0	0	0	0	0	0	0	0	0	0		14	2018	5442.76	635.751	0	156.174	1717.61	635.751
																						15	2019	0.401652	0.0793501	0.0227113	0.0127881	0.221693	0.101736	0.0123223	0	0.0135096	0.00751485	0.06	0.0419489	0.00658844	0	0	0	0		15	2019	3449.4	681.462	195.045	109.825	1903.91	873.717
																						16	2020	0.254551	0.0644999	0.0391183	0.00907102	0.185569	0.0953488	0.0332252	0.00242634	0.0286685	0.00928401	0.0706514	0.0856971	0.0303098	0.00540575	0	0.0059232	0.0417629		16	2020	2186.09	553.927	335.949	77.9023	1593.68	818.859
																						17	2021	0.161324	0.0471038	0.0452353	0.00644095	0.139001	0.0761742	0.0567596	0.00758936	0.0371595	0.00865015	0.0605497	0.0905944	0.0504859	0.0299116	0.00154134	0.0138096	0.0690636		17	2021	1385.46	404.529	388.482	55.3152	1193.74	654.187
																						18	2022	0.102241	0.0325806	0.0438774	0.00456003	0.0982492	0.0559456	0.0786838	0.0143138	0.0386796	0.0072316	0.0458816	0.0761124	0.0520511	0.0693263	0.00547691	0.0182295	0.0737991		18	2022	878.048	279.803	376.821	39.1617	843.768	480.463
																						19	2023	0.0647962	0.0218435	0.0385385	0.00321309	0.0670876	0.0391047	0.0969087	0.0213583	0.0357341	0.00575303	0.0326432	0.0573618	0.0441622	0.107379	0.0111663	0.0189677	0.065631		19	2023	556.472	187.593	330.97	27.5942	576.151	335.833
																						PROPORTION OF 2018 POPULATION IN EACH STATE																				Number of individuals in each state
																						Period	Year	Asympt_NoCare	Asympt_InCare	Asympt_LTFU	Asympt_Dead	Int_NoCare	Int_InCare	Int_ART1	Int_ART2	Int_LTFU	Int_Dead	AIDS_NoCare	AIDS_InCare	AIDS_ART1ear	AIDS_ART1late	AIDS_ART2	AIDS_LTFU	AIDS_DEAD		Period	Year	Asympt_NoCare	Asympt_InCare	Asympt_LTFU	Asympt_Dead	Int_NoCare	Int_InCare
																						0	2004	0	0	0	0	0	0	0	0	0	0	0	0	0	0	0	0	0		0	2004	0	0	0	0	0	0
																						1	2005	0	0	0	0	0	0	0	0	0	0	0	0	0	0	0	0	0		1	2005	0	0	0	0	0	0
																						2	2006	0	0	0	0	0	0	0	0	0	0	0	0	0	0	0	0	0		2	2006	0	0	0	0	0	0
																						3	2007	0	0	0	0	0	0	0	0	0	0	0	0	0	0	0	0	0		3	2007	0	0	0	0	0	0
																						4	2008	0	0	0	0	0	0	0	0	0	0	0	0	0	0	0	0	0		4	2008	0	0	0	0	0	0
																						5	2009	0	0	0	0	0	0	0	0	0	0	0	0	0	0	0	0	0		5	2009	0	0	0	0	0	0
																						6	2010	0	0	0	0	0	0	0	0	0	0	0	0	0	0	0	0	0		6	2010	0	0	0	0	0	0
																						7	2011	0	0	0	0	0	0	0	0	0	0	0	0	0	0	0	0	0		7	2011	0	0	0	0	0	0
																						8	2012	0	0	0	0	0	0	0	0	0	0	0	0	0	0	0	0	0		8	2012	0	0	0	0	0	0
																						9	2013	0	0	0	0	0	0	0	0	0	0	0	0	0	0	0	0	0		9	2013	0	0	0	0	0	0
																						10	2014	0	0	0	0	0	0	0	0	0	0	0	0	0	0	0	0	0		10	2014	0	0	0	0	0	0
																						11	2015	0	0	0	0	0	0	0	0	0	0	0	0	0	0	0	0	0		11	2015	0	0	0	0	0	0
																						12	2016	0	0	0	0	0	0	0	0	0	0	0	0	0	0	0	0	0		12	2016	0	0	0	0	0	0
																						13	2017	0	0	0	0	0	0	0	0	0	0	0	0	0	0	0	0	0		13	2017	0	0	0	0	0	0
																						14	2018	1	0	0	0	0	0	0	0	0	0	0	0	0	0	0	0	0		14	2018	8588.04	0	0	0	0	0
																						15	2019	0.63376	0.0740274	0	0.018185	0.2	0.0740274	0	0	0	0	0	0	0	0	0	0	0		15	2019	5442.76	635.751	0	156.174	1717.61	635.751
																						16	2020	0.401652	0.0793501	0.0227113	0.0127881	0.221693	0.101736	0.0123223	0	0.0135096	0.00751485	0.06	0.0419489	0.00658844	0	0	0	0		16	2020	3449.4	681.462	195.045	109.825	1903.91	873.717
																						17	2021	0.254551	0.0644999	0.0391183	0.00907102	0.185569	0.0953488	0.0332252	0.00242634	0.0286685	0.00928401	0.0706514	0.0856971	0.0303098	0.00540575	0	0.0059232	0.0417629		17	2021	2186.09	553.927	335.949	77.9023	1593.68	818.859
																						18	2022	0.161324	0.0471038	0.0452353	0.00644095	0.139001	0.0761742	0.0567596	0.00758936	0.0371595	0.00865015	0.0605497	0.0905944	0.0504859	0.0299116	0.00154134	0.0138096	0.0690636		18	2022	1385.46	404.529	388.482	55.3152	1193.74	654.187
																						19	2023	0.102241	0.0325806	0.0438774	0.00456003	0.0982492	0.0559456	0.0786838	0.0143138	0.0386796	0.0072316	0.0458816	0.0761124	0.0520511	0.0693263	0.00547691	0.0182295	0.0737991		19	2023	878.048	279.803	376.821	39.1617	843.768	480.463
																						PROPORTION OF 2019 POPULATION IN EACH STATE																				Number of individuals in each state
																						Period	Year	Asympt_NoCare	Asympt_InCare	Asympt_LTFU	Asympt_Dead	Int_NoCare	Int_InCare	Int_ART1	Int_ART2	Int_LTFU	Int_Dead	AIDS_NoCare	AIDS_InCare	AIDS_ART1ear	AIDS_ART1late	AIDS_ART2	AIDS_LTFU	AIDS_DEAD		Period	Year	Asympt_NoCare	Asympt_InCare	Asympt_LTFU	Asympt_Dead	Int_NoCare	Int_InCare
																						0	2004	0	0	0	0	0	0	0	0	0	0	0	0	0	0	0	0	0		0	2004	0	0	0	0	0	0
																						1	2005	0	0	0	0	0	0	0	0	0	0	0	0	0	0	0	0	0		1	2005	0	0	0	0	0	0
																						2	2006	0	0	0	0	0	0	0	0	0	0	0	0	0	0	0	0	0		2	2006	0	0	0	0	0	0
																						3	2007	0	0	0	0	0	0	0	0	0	0	0	0	0	0	0	0	0		3	2007	0	0	0	0	0	0
																						4	2008	0	0	0	0	0	0	0	0	0	0	0	0	0	0	0	0	0		4	2008	0	0	0	0	0	0
																						5	2009	0	0	0	0	0	0	0	0	0	0	0	0	0	0	0	0	0		5	2009	0	0	0	0	0	0
																						6	2010	0	0	0	0	0	0	0	0	0	0	0	0	0	0	0	0	0		6	2010	0	0	0	0	0	0
																						7	2011	0	0	0	0	0	0	0	0	0	0	0	0	0	0	0	0	0		7	2011	0	0	0	0	0	0
																						8	2012	0	0	0	0	0	0	0	0	0	0	0	0	0	0	0	0	0		8	2012	0	0	0	0	0	0
																						9	2013	0	0	0	0	0	0	0	0	0	0	0	0	0	0	0	0	0		9	2013	0	0	0	0	0	0
																						10	2014	0	0	0	0	0	0	0	0	0	0	0	0	0	0	0	0	0		10	2014	0	0	0	0	0	0
																						11	2015	0	0	0	0	0	0	0	0	0	0	0	0	0	0	0	0	0		11	2015	0	0	0	0	0	0
																						12	2016	0	0	0	0	0	0	0	0	0	0	0	0	0	0	0	0	0		12	2016	0	0	0	0	0	0
																						13	2017	0	0	0	0	0	0	0	0	0	0	0	0	0	0	0	0	0		13	2017	0	0	0	0	0	0
																						14	2018	0	0	0	0	0	0	0	0	0	0	0	0	0	0	0	0	0		14	2018	0	0	0	0	0	0
																						15	2019	1	0	0	0	0	0	0	0	0	0	0	0	0	0	0	0	0		15	2019	8588.04	0	0	0	0	0
																						16	2020	0.63376	0.0740274	0	0.018185	0.2	0.0740274	0	0	0	0	0	0	0	0	0	0	0		16	2020	5442.76	635.751	0	156.174	1717.61	635.751
																						17	2021	0.401652	0.0793501	0.0227113	0.0127881	0.221693	0.101736	0.0123223	0	0.0135096	0.00751485	0.06	0.0419489	0.00658844	0	0	0	0		17	2021	3449.4	681.462	195.045	109.825	1903.91	873.717
																						18	2022	0.254551	0.0644999	0.0391183	0.00907102	0.185569	0.0953488	0.0332252	0.00242634	0.0286685	0.00928401	0.0706514	0.0856971	0.0303098	0.00540575	0	0.0059232	0.0417629		18	2022	2186.09	553.927	335.949	77.9023	1593.68	818.859
																						19	2023	0.161324	0.0471038	0.0452353	0.00644095	0.139001	0.0761742	0.0567596	0.00758936	0.0371595	0.00865015	0.0605497	0.0905944	0.0504859	0.0299116	0.00154134	0.0138096	0.0690636		19	2023	1385.46	404.529	388.482	55.3152	1193.74	654.187
																						PROPORTION OF 2020 POPULATION IN EACH STATE																				Number of individuals in each state
																						Period	Year	Asympt_NoCare	Asympt_InCare	Asympt_LTFU	Asympt_Dead	Int_NoCare	Int_InCare	Int_ART1	Int_ART2	Int_LTFU	Int_Dead	AIDS_NoCare	AIDS_InCare	AIDS_ART1ear	AIDS_ART1late	AIDS_ART2	AIDS_LTFU	AIDS_DEAD		Period	Year	Asympt_NoCare	Asympt_InCare	Asympt_LTFU	Asympt_Dead	Int_NoCare	Int_InCare
																						0	2004	0	0	0	0	0	0	0	0	0	0	0	0	0	0	0	0	0		0	2004	0	0	0	0	0	0
																						1	2005	0	0	0	0	0	0	0	0	0	0	0	0	0	0	0	0	0		1	2005	0	0	0	0	0	0
																						2	2006	0	0	0	0	0	0	0	0	0	0	0	0	0	0	0	0	0		2	2006	0	0	0	0	0	0
																						3	2007	0	0	0	0	0	0	0	0	0	0	0	0	0	0	0	0	0		3	2007	0	0	0	0	0	0
																						4	2008	0	0	0	0	0	0	0	0	0	0	0	0	0	0	0	0	0		4	2008	0	0	0	0	0	0
																						5	2009	0	0	0	0	0	0	0	0	0	0	0	0	0	0	0	0	0		5	2009	0	0	0	0	0	0
																						6	2010	0	0	0	0	0	0	0	0	0	0	0	0	0	0	0	0	0		6	2010	0	0	0	0	0	0
																						7	2011	0	0	0	0	0	0	0	0	0	0	0	0	0	0	0	0	0		7	2011	0	0	0	0	0	0
																						8	2012	0	0	0	0	0	0	0	0	0	0	0	0	0	0	0	0	0		8	2012	0	0	0	0	0	0
																						9	2013	0	0	0	0	0	0	0	0	0	0	0	0	0	0	0	0	0		9	2013	0	0	0	0	0	0
																						10	2014	0	0	0	0	0	0	0	0	0	0	0	0	0	0	0	0	0		10	2014	0	0	0	0	0	0
																						11	2015	0	0	0	0	0	0	0	0	0	0	0	0	0	0	0	0	0		11	2015	0	0	0	0	0	0
																						12	2016	0	0	0	0	0	0	0	0	0	0	0	0	0	0	0	0	0		12	2016	0	0	0	0	0	0
																						13	2017	0	0	0	0	0	0	0	0	0	0	0	0	0	0	0	0	0		13	2017	0	0	0	0	0	0
																						14	2018	0	0	0	0	0	0	0	0	0	0	0	0	0	0	0	0	0		14	2018	0	0	0	0	0	0
																						15	2019	0	0	0	0	0	0	0	0	0	0	0	0	0	0	0	0	0		15	2019	0	0	0	0	0	0
																						16	2020	1	0	0	0	0	0	0	0	0	0	0	0	0	0	0	0	0		16	2020	8588.04	0	0	0	0	0
																						17	2021	0.63376	0.0740274	0	0.018185	0.2	0.0740274	0	0	0	0	0	0	0	0	0	0	0		17	2021	5442.76	635.751	0	156.174	1717.61	635.751
																						18	2022	0.401652	0.0793501	0.0227113	0.0127881	0.221693	0.101736	0.0123223	0	0.0135096	0.00751485	0.06	0.0419489	0.00658844	0	0	0	0		18	2022	3449.4	681.462	195.045	109.825	1903.91	873.717
																						19	2023	0.254551	0.0644999	0.0391183	0.00907102	0.185569	0.0953488	0.0332252	0.00242634	0.0286685	0.00928401	0.0706514	0.0856971	0.0303098	0.00540575	0	0.0059232	0.0417629		19	2023	2186.09	553.927	335.949	77.9023	1593.68	818.859
																						PROPORTION OF 2021 POPULATION IN EACH STATE																				Number of individuals in each state
																						Period	Year	Asympt_NoCare	Asympt_InCare	Asympt_LTFU	Asympt_Dead	Int_NoCare	Int_InCare	Int_ART1	Int_ART2	Int_LTFU	Int_Dead	AIDS_NoCare	AIDS_InCare	AIDS_ART1ear	AIDS_ART1late	AIDS_ART2	AIDS_LTFU	AIDS_DEAD		Period	Year	Asympt_NoCare	Asympt_InCare	Asympt_LTFU	Asympt_Dead	Int_NoCare	Int_InCare
																						0	2004	0	0	0	0	0	0	0	0	0	0	0	0	0	0	0	0	0		0	2004	0	0	0	0	0	0
																						1	2005	0	0	0	0	0	0	0	0	0	0	0	0	0	0	0	0	0		1	2005	0	0	0	0	0	0
																						2	2006	0	0	0	0	0	0	0	0	0	0	0	0	0	0	0	0	0		2	2006	0	0	0	0	0	0
																						3	2007	0	0	0	0	0	0	0	0	0	0	0	0	0	0	0	0	0		3	2007	0	0	0	0	0	0
																						4	2008	0	0	0	0	0	0	0	0	0	0	0	0	0	0	0	0	0		4	2008	0	0	0	0	0	0
																						5	2009	0	0	0	0	0	0	0	0	0	0	0	0	0	0	0	0	0		5	2009	0	0	0	0	0	0
																						6	2010	0	0	0	0	0	0	0	0	0	0	0	0	0	0	0	0	0		6	2010	0	0	0	0	0	0
																						7	2011	0	0	0	0	0	0	0	0	0	0	0	0	0	0	0	0	0		7	2011	0	0	0	0	0	0
																						8	2012	0	0	0	0	0	0	0	0	0	0	0	0	0	0	0	0	0		8	2012	0	0	0	0	0	0
																						9	2013	0	0	0	0	0	0	0	0	0	0	0	0	0	0	0	0	0		9	2013	0	0	0	0	0	0
																						10	2014	0	0	0	0	0	0	0	0	0	0	0	0	0	0	0	0	0		10	2014	0	0	0	0	0	0
																						11	2015	0	0	0	0	0	0	0	0	0	0	0	0	0	0	0	0	0		11	2015	0	0	0	0	0	0
																						12	2016	0	0	0	0	0	0	0	0	0	0	0	0	0	0	0	0	0		12	2016	0	0	0	0	0	0
																						13	2017	0	0	0	0	0	0	0	0	0	0	0	0	0	0	0	0	0		13	2017	0	0	0	0	0	0
																						14	2018	0	0	0	0	0	0	0	0	0	0	0	0	0	0	0	0	0		14	2018	0	0	0	0	0	0
																						15	2019	0	0	0	0	0	0	0	0	0	0	0	0	0	0	0	0	0		15	2019	0	0	0	0	0	0
																						16	2020	0	0	0	0	0	0	0	0	0	0	0	0	0	0	0	0	0		16	2020	0	0	0	0	0	0
																						17	2021	1	0	0	0	0	0	0	0	0	0	0	0	0	0	0	0	0		17	2021	8588.04	0	0	0	0	0
																						18	2022	0.63376	0.0740274	0	0.018185	0.2	0.0740274	0	0	0	0	0	0	0	0	0	0	0		18	2022	5442.76	635.751	0	156.174	1717.61	635.751
																						19	2023	0.401652	0.0793501	0.0227113	0.0127881	0.221693	0.101736	0.0123223	0	0.0135096	0.00751485	0.06	0.0419489	0.00658844	0	0	0	0		19	2023	3449.4	681.462	195.045	109.825	1903.91	873.717
																						PROPORTION OF 2022 POPULATION IN EACH STATE																				Number of individuals in each state
																						Period	Year	Asympt_NoCare	Asympt_InCare	Asympt_LTFU	Asympt_Dead	Int_NoCare	Int_InCare	Int_ART1	Int_ART2	Int_LTFU	Int_Dead	AIDS_NoCare	AIDS_InCare	AIDS_ART1ear	AIDS_ART1late	AIDS_ART2	AIDS_LTFU	AIDS_DEAD		Period	Year	Asympt_NoCare	Asympt_InCare	Asympt_LTFU	Asympt_Dead	Int_NoCare	Int_InCare
																						0	2004	0	0	0	0	0	0	0	0	0	0	0	0	0	0	0	0	0		0	2004	0	0	0	0	0	0
																						1	2005	0	0	0	0	0	0	0	0	0	0	0	0	0	0	0	0	0		1	2005	0	0	0	0	0	0
																						2	2006	0	0	0	0	0	0	0	0	0	0	0	0	0	0	0	0	0		2	2006	0	0	0	0	0	0
																						3	2007	0	0	0	0	0	0	0	0	0	0	0	0	0	0	0	0	0		3	2007	0	0	0	0	0	0
																						4	2008	0	0	0	0	0	0	0	0	0	0	0	0	0	0	0	0	0		4	2008	0	0	0	0	0	0
																						5	2009	0	0	0	0	0	0	0	0	0	0	0	0	0	0	0	0	0		5	2009	0	0	0	0	0	0
																						6	2010	0	0	0	0	0	0	0	0	0	0	0	0	0	0	0	0	0		6	2010	0	0	0	0	0	0
																						7	2011	0	0	0	0	0	0	0	0	0	0	0	0	0	0	0	0	0		7	2011	0	0	0	0	0	0
																						8	2012	0	0	0	0	0	0	0	0	0	0	0	0	0	0	0	0	0		8	2012	0	0	0	0	0	0
																						9	2013	0	0	0	0	0	0	0	0	0	0	0	0	0	0	0	0	0		9	2013	0	0	0	0	0	0
																						10	2014	0	0	0	0	0	0	0	0	0	0	0	0	0	0	0	0	0		10	2014	0	0	0	0	0	0
																						11	2015	0	0	0	0	0	0	0	0	0	0	0	0	0	0	0	0	0		11	2015	0	0	0	0	0	0
																						12	2016	0	0	0	0	0	0	0	0	0	0	0	0	0	0	0	0	0		12	2016	0	0	0	0	0	0
																						13	2017	0	0	0	0	0	0	0	0	0	0	0	0	0	0	0	0	0		13	2017	0	0	0	0	0	0
																						14	2018	0	0	0	0	0	0	0	0	0	0	0	0	0	0	0	0	0		14	2018	0	0	0	0	0	0
																						15	2019	0	0	0	0	0	0	0	0	0	0	0	0	0	0	0	0	0		15	2019	0	0	0	0	0	0
																						16	2020	0	0	0	0	0	0	0	0	0	0	0	0	0	0	0	0	0		16	2020	0	0	0	0	0	0
																						17	2021	0	0	0	0	0	0	0	0	0	0	0	0	0	0	0	0	0		17	2021	0	0	0	0	0	0
																						18	2022	1	0	0	0	0	0	0	0	0	0	0	0	0	0	0	0	0		18	2022	8588.04	0	0	0	0	0
																						19	2023	0.63376	0.0740274	0	0.018185	0.2	0.0740274	0	0	0	0	0	0	0	0	0	0	0		19	2023	5442.76	635.751	0	156.174	1717.61	635.751
																						PROPORTION OF 2023 POPULATION IN EACH STATE																				Number of individuals in each state
																						Period	Year	Asympt_NoCare	Asympt_InCare	Asympt_LTFU	Asympt_Dead	Int_NoCare	Int_InCare	Int_ART1	Int_ART2	Int_LTFU	Int_Dead	AIDS_NoCare	AIDS_InCare	AIDS_ART1ear	AIDS_ART1late	AIDS_ART2	AIDS_LTFU	AIDS_DEAD		Period	Year	Asympt_NoCare	Asympt_InCare	Asympt_LTFU	Asympt_Dead	Int_NoCare	Int_InCare
																						0	2004	0	0	0	0	0	0	0	0	0	0	0	0	0	0	0	0	0		0	2004	0	0	0	0	0	0
																						1	2005	0	0	0	0	0	0	0	0	0	0	0	0	0	0	0	0	0		1	2005	0	0	0	0	0	0
																						2	2006	0	0	0	0	0	0	0	0	0	0	0	0	0	0	0	0	0		2	2006	0	0	0	0	0	0
																						3	2007	0	0	0	0	0	0	0	0	0	0	0	0	0	0	0	0	0		3	2007	0	0	0	0	0	0
																						4	2008	0	0	0	0	0	0	0	0	0	0	0	0	0	0	0	0	0		4	2008	0	0	0	0	0	0
																						5	2009	0	0	0	0	0	0	0	0	0	0	0	0	0	0	0	0	0		5	2009	0	0	0	0	0	0
																						6	2010	0	0	0	0	0	0	0	0	0	0	0	0	0	0	0	0	0		6	2010	0	0	0	0	0	0
																						7	2011	0	0	0	0	0	0	0	0	0	0	0	0	0	0	0	0	0		7	2011	0	0	0	0	0	0
																						8	2012	0	0	0	0	0	0	0	0	0	0	0	0	0	0	0	0	0		8	2012	0	0	0	0	0	0
																						9	2013	0	0	0	0	0	0	0	0	0	0	0	0	0	0	0	0	0		9	2013	0	0	0	0	0	0
																						10	2014	0	0	0	0	0	0	0	0	0	0	0	0	0	0	0	0	0		10	2014	0	0	0	0	0	0
																						11	2015	0	0	0	0	0	0	0	0	0	0	0	0	0	0	0	0	0		11	2015	0	0	0	0	0	0
																						12	2016	0	0	0	0	0	0	0	0	0	0	0	0	0	0	0	0	0		12	2016	0	0	0	0	0	0
																						13	2017	0	0	0	0	0	0	0	0	0	0	0	0	0	0	0	0	0		13	2017	0	0	0	0	0	0
																						14	2018	0	0	0	0	0	0	0	0	0	0	0	0	0	0	0	0	0		14	2018	0	0	0	0	0	0
																						15	2019	0	0	0	0	0	0	0	0	0	0	0	0	0	0	0	0	0		15	2019	0	0	0	0	0	0
																						16	2020	0	0	0	0	0	0	0	0	0	0	0	0	0	0	0	0	0		16	2020	0	0	0	0	0	0
																						17	2021	0	0	0	0	0	0	0	0	0	0	0	0	0	0	0	0	0		17	2021	0	0	0	0	0	0
																						18	2022	0	0	0	0	0	0	0	0	0	0	0	0	0	0	0	0	0		18	2022	0	0	0	0	0	0
																						19	2023	1	0	0	0	0	0	0	0	0	0	0	0	0	0	0	0	0		19	2023	8588.04	0	0	0	0	0
																																										Number of individuals in each state (2004-2023)
																																										Period	Year	Asympt_NoCare	Asympt_InCare	Asympt_LTFU	Asympt_Dead	Int_NoCare	Int_InCare
																																										0	2004	37328.9	8625.51	3817.44	0	24973.4	6397.3
																																										1	2005	35944.6	5881.2	5168.12	895.425	20500.7	7454.22
																																										2	2006	34129.4	4600.85	5218.46	847.988	17889.3	6781.06
																																										3	2007	31815.8	4542.33	4858.92	794.047	15318	7069.61
																																										4	2008	29383.7	4345.43	4603.44	744.438	13634.7	6711.88
																																										5	2009	27210.3	4079.12	4374.26	692.205	12349.2	6228.33
																																										6	2010	25832.8	3801.54	4141.15	643.968	11304.3	5754.86
																																										7	2011	24959.9	3577.95	3902	609.944	10532.8	5364.56
																																										8	2012	24406.6	3415.36	3675.42	585.905	9991.93	5072.17
																																										9	2013	24056	3303.17	3438.73	568.949	9624.54	4865.24
																																										10	2014	23833.8	3228.06	3250.34	556.355	9380.01	4723.9
																																										11	2015	23692.9	3178.7	3104.75	547.606	9219.49	4629.59
																																										12	2016	23603.7	3146.65	2994.9	541.555	9115.12	4567.61
																																										13	2017	23547.1	3126	2913.6	537.388	9047.73	4527.32
																																										14	2018	23511.3	3112.76	2854.38	534.528	9004.42	4501.32
																																										15	2019	23488.5	3104.31	2811.8	532.574	8976.69	4484.62
																																										16	2020	23474.1	3098.92	2781.5	531.242	8958.99	4473.94
																																										17	2021	23465	3095.5	2760.14	530.337	8947.7	4467.12
																																										18	2022	23459.2	3093.32	2745.2	529.724	8940.52	4462.78
																																										19	2023	23455.6	3091.94	2734.81	529.31	8935.96	4460.02
[truncated: 62 more columns]

[truncated: 14 more sheets: Diff (SN-SC), Diff (SN-Matrix), Diff (SC-Matrix), Errors, SCF Output (diff), Output1 (diff), Output2 (diff), TPM Summary Measures, SCF (name) Summary Measures, SCF (cell) Summary Measures, SCF Summary Measures (diff), Summary Measures (diff1), Summary Measures (diff2), Log]
